# Supplementary material for: A comprehensive profile of the tilapia ( Oreochromis niloticus ) circular RNA and circRNA–miRNA network in the pathogenesis of meningoencephalitis of teleosts
Source: Royal Society of Chemistry journal article supplement (doi:10.1039/c9mo00025a), 2019-05-02
Supplement: c9mo00025a1.zip [file c9mo00025a1.zip]

## Sheet: Sheet1
CircRNA ID	PBS-Br (TPM)	Sa-Br (TPM)	PBS-Br (count)	Sa-Br (count)	CircRNA-host Gene	Chromosome	Strand	Start	End	Length	CircRNA Type
novel_circ_000001	132.698	31.5124	10	2	GeneID_100690862	NC_031965.1	-	37241	50195	1955	annot_exons
novel_circ_000002	26.5396	31.5124	2	2	GeneID_100690862	NC_031965.1	-	38522	39050	443	annot_exons
novel_circ_000003	0	31.5124	0	2	GeneID_100690862	NC_031965.1	-	38522	42864	1115	annot_exons
novel_circ_000004	0	31.5124	0	2	GeneID_100690862	NC_031965.1	-	40152	42864	672	annot_exons
novel_circ_000005	26.5396	0	2	0	GeneID_100690862	NC_031965.1	-	56219	89269	650	annot_exons
novel_circ_000006	0	31.5124	0	2	GeneID_102081337	NC_031965.1	-	475607	480427	1092	annot_exons
novel_circ_000008	53.0793	0	4	0	GeneID_100708568	NC_031965.1	+	562080	563081	730	annot_exons
novel_circ_000014	39.8094	15.7562	3	1	GeneID_100710887	NC_031965.1	+	863357	866276	690	annot_exons
novel_circ_000015	39.8094	47.2687	3	3	GeneID_102081252	NC_031965.1	+	912130	913336	340	annot_exons
novel_circ_000016	0	63.0249	0	4	GeneID_102081252	NC_031965.1	+	912130	927735	1042	annot_exons
novel_circ_000017	92.8887	31.5124	7	2	GeneID_102081252	NC_031965.1	+	916284	931770	825	annot_exons
novel_circ_000018	145.968	94.5373	11	6	GeneID_100710622	NC_031965.1	-	952026	959010	829	annot_exons
novel_circ_000022	0	31.5124	0	2	GeneID_100697279	NC_031965.1	-	1578667	1600657	4430	annot_exons
novel_circ_000024	13.2698	47.2687	1	3	GeneID_100697279	NC_031965.1	-	1589898	1593912	2609	annot_exons
novel_circ_000025	411.364	646.005	31	41	GeneID_100697279	NC_031965.1	-	1589898	1594595	2722	annot_exons
novel_circ_000026	79.6189	47.2687	6	3	GeneID_100697279	NC_031965.1	-	1589898	1596158	2746	annot_exons
novel_circ_000027	1048.32	1118.69	79	71	GeneID_100697279	NC_031965.1	-	1589898	1600657	2972	annot_exons
novel_circ_000028	0	31.5124	0	2	GeneID_100697279	NC_031965.1	-	1660255	1673665	336	annot_exons
novel_circ_000029	26.5396	31.5124	2	2	GeneID_100697279	NC_031965.1	-	1670033	1673665	254	annot_exons
novel_circ_000030	13.2698	126.05	1	8	GeneID_100697279	NC_031965.1	-	1720458	1782740	1195	annot_exons
novel_circ_000031	26.5396	47.2687	2	3	GeneID_100697279	NC_031965.1	-	1738787	1773159	900	annot_exons
novel_circ_000032	26.5396	110.294	2	7	GeneID_100697279	NC_031965.1	-	1751887	1773159	822	annot_exons
novel_circ_000033	26.5396	47.2687	2	3	GeneID_100697279	NC_031965.1	-	1751887	1782740	1050	annot_exons
novel_circ_000034	79.6189	31.5124	6	2	GeneID_100697279	NC_031965.1	-	1768962	1773159	385	annot_exons
novel_circ_000035	79.6189	141.806	6	9	GeneID_100697279	NC_031965.1	-	1768962	1782740	613	annot_exons
novel_circ_000036	39.8094	47.2687	3	3	GeneID_100696207	NC_031965.1	+	2081307	2114537	439	annot_exons
novel_circ_000037	39.8094	63.0249	3	4	GeneID_100696207	NC_031965.1	+	2106624	2111272	227	annot_exons
novel_circ_000038	26.5396	15.7562	2	1	GeneID_100696207	NC_031965.1	+	2106624	2128217	1043	annot_exons
novel_circ_000039	0	47.2687	0	3	GeneID_100696207	NC_031965.1	+	2121612	2128217	596	annot_exons
novel_circ_000040	238.857	63.0249	18	4	GeneID_102076095	NC_031965.1	-	2191138	2195266	549	annot_exons
novel_circ_000041	39.8094	15.7562	3	1	GeneID_100705180	NC_031965.1	+	2722254	2778736	419	annot_exons
novel_circ_000042	0	31.5124	0	2	GeneID_100705180	NC_031965.1	+	2722254	2805099	1116	annot_exons
novel_circ_000043	0	94.5373	0	6	GeneID_100705180	NC_031965.1	+	2751029	2805099	965	annot_exons
novel_circ_000044	0	47.2687	0	3	GeneID_100705180	NC_031965.1	+	2788745	2805099	697	annot_exons
novel_circ_000045	66.3491	0	5	0	GeneID_100705180	NC_031965.1	+	2794189	2805099	541	annot_exons
novel_circ_000047	26.5396	31.5124	2	2	GeneID_100705180	NC_031965.1	+	2878181	2950725	486	annot_exons
novel_circ_000048	0	31.5124	0	2	GeneID_100701401	NC_031965.1	-	3550358	3552686	701	annot_exons
novel_circ_000049	26.5396	0	2	0	GeneID_100701672	NC_031965.1	+	3597960	3602775	864	annot_exons
novel_circ_000050	39.8094	31.5124	3	2	GeneID_100701672	NC_031965.1	+	3597960	3607300	1061	annot_exons
novel_circ_000051	39.8094	94.5373	3	6	GeneID_100702482	NC_031965.1	+	3788802	3789499	277	annot_exons
novel_circ_000052	53.0793	0	4	0	GeneID_100702482	NC_031965.1	+	3800497	3807627	745	annot_exons
novel_circ_000054	0	31.5124	0	2	GeneID_100702482	NC_031965.1	+	3813130	3821588	2406	annot_exons
novel_circ_000055	26.5396	0	2	0	GeneID_100702482	NC_031965.1	+	3824769	3827397	321	annot_exons
novel_circ_000056	26.5396	31.5124	2	2	GeneID_100699600	NC_031965.1	-	3835215	3837244	445	annot_exons
novel_circ_000057	26.5396	78.7811	2	5	GeneID_100703837	NC_031965.1	+	4050505	4071852	799	annot_exons
novel_circ_000058	0	31.5124	0	2	GeneID_100703837	NC_031965.1	+	4050505	4081283	1025	annot_exons
novel_circ_000059	79.6189	31.5124	6	2	GeneID_100703837	NC_031965.1	+	4071671	4081283	408	annot_exons
novel_circ_000061	26.5396	78.7811	2	5	GeneID_100704374	NC_031965.1	+	4351713	4353076	317	annot_exons
novel_circ_000062	66.3491	31.5124	5	2	GeneID_100704374	NC_031965.1	+	4351713	4356202	508	annot_exons
novel_circ_000063	13.2698	47.2687	1	3	GeneID_100704374	NC_031965.1	+	4351713	4375325	2504	annot_exons
novel_circ_000064	26.5396	0	2	0	GeneID_100704374	NC_031965.1	+	4356069	4368509	2007	annot_exons
novel_circ_000065	13.2698	47.2687	1	3	GeneID_100704374	NC_031965.1	+	4387015	4393333	1677	annot_exons
novel_circ_000066	26.5396	0	2	0	GeneID_100704374	NC_031965.1	+	4395718	4403296	886	annot_exons
novel_circ_000068	53.0793	0	4	0	GeneID_100701326	NC_031965.1	-	4816729	4817177	349	annot_exons
novel_circ_000070	981.966	913.861	74	58	GeneID_100694351	NC_031965.1	+	5155934	5163997	425	annot_exons
novel_circ_000071	66.3491	31.5124	5	2	GeneID_100694351	NC_031965.1	+	5155934	5180873	639	annot_exons
novel_circ_000072	26.5396	141.806	2	9	GeneID_100694351	NC_031965.1	+	5155934	5184858	742	annot_exons
novel_circ_000073	0	110.294	0	7	GeneID_100694351	NC_031965.1	+	5155934	5201656	954	annot_exons
novel_circ_000074	26.5396	31.5124	2	2	GeneID_100694351	NC_031965.1	+	5155934	5225757	1393	annot_exons
novel_circ_000076	26.5396	0	2	0	GeneID_100694351	NC_031965.1	+	5210804	5216874	212	annot_exons
novel_circ_000077	39.8094	252.1	3	16	GeneID_102083001	NC_031965.1	+	5415495	5429503	884	annot_exons
novel_circ_000078	238.857	0	18	0	GeneID_102083001	NC_031965.1	+	5415495	5471391	2099	annot_exons
novel_circ_000081	0	31.5124	0	2	GeneID_102083001	NC_031965.1	+	5422312	5424134	277	annot_exons
novel_circ_000082	39.8094	15.7562	3	1	GeneID_102083001	NC_031965.1	+	5422312	5426187	514	annot_exons
novel_circ_000083	650.221	346.637	49	22	GeneID_102083001	NC_031965.1	+	5422312	5429503	694	annot_exons
novel_circ_000084	79.6189	0	6	0	GeneID_102083001	NC_031965.1	+	5422312	5448783	1131	annot_exons
novel_circ_000085	26.5396	0	2	0	GeneID_102083001	NC_031965.1	+	5441710	5470024	842	annot_exons
novel_circ_000086	26.5396	0	2	0	GeneID_102083001	NC_031965.1	+	5448636	5471391	926	annot_exons
novel_circ_000087	252.126	15.7562	19	1	GeneID_102083001	NC_031965.1	+	5462261	5471391	586	annot_exons
novel_circ_000088	79.6189	31.5124	6	2	GeneID_102083001	NC_031965.1	+	5469815	5471391	416	annot_exons
novel_circ_000089	26.5396	0	2	0	GeneID_102083001	NC_031965.1	+	5469815	5484698	615	annot_exons
novel_circ_000092	13.2698	31.5124	1	2	GeneID_100690785	NC_031965.1	+	5888003	5891625	660	annot_exons
novel_circ_000093	79.6189	47.2687	6	3	GeneID_100690510	NC_031965.1	+	5910241	5916762	280	annot_exons
novel_circ_000094	26.5396	0	2	0	GeneID_100691318	NC_031965.1	+	5972536	5973232	536	annot_exons
novel_circ_000095	26.5396	0	2	0	GeneID_100691932	NC_031965.1	-	6042269	6044195	688	annot_exons
novel_circ_000096	53.0793	47.2687	4	3	GeneID_100691932	NC_031965.1	-	6042269	6048169	778	annot_exons
novel_circ_000097	265.396	220.587	20	14	GeneID_100691932	NC_031965.1	-	6042269	6048896	1061	annot_exons
novel_circ_000098	92.8887	141.806	7	9	GeneID_100691932	NC_031965.1	-	6042269	6054899	2077	annot_exons
novel_circ_000099	79.6189	31.5124	6	2	GeneID_100691932	NC_031965.1	-	6048514	6050598	687	annot_exons
novel_circ_000100	39.8094	31.5124	3	2	GeneID_100691932	NC_031965.1	-	6048514	6054899	1299	annot_exons
novel_circ_000101	39.8094	63.0249	3	4	GeneID_100698347	NC_031965.1	-	6258861	6265933	866	annot_exons
novel_circ_000102	145.968	31.5124	11	2	GeneID_102079740	NC_031965.1	+	6333956	6339026	352	annot_exons
novel_circ_000103	782.919	94.5373	59	6	GeneID_102079740	NC_031965.1	+	6333956	6404246	453	annot_exons
novel_circ_000104	0	63.0249	0	4	GeneID_102079740	NC_031965.1	+	6337966	6404246	347	annot_exons
novel_circ_000105	26.5396	0	2	0	GeneID_100698957	NC_031965.1	-	6559191	6593403	2299	annot_exons
novel_circ_000106	53.0793	0	4	0	GeneID_100698957	NC_031965.1	-	6559904	6574555	2087	annot_exons
novel_circ_000107	66.3491	0	5	0	GeneID_100696549	NC_031965.1	+	7466770	7473544	216	annot_exons
novel_circ_000108	53.0793	47.2687	4	3	GeneID_100696549	NC_031965.1	+	7497191	7515160	369	annot_exons
novel_circ_000109	39.8094	78.7811	3	5	GeneID_100696549	NC_031965.1	+	7497191	7524070	474	annot_exons
novel_circ_000110	26.5396	0	2	0	GeneID_100696549	NC_031965.1	+	7509885	7524070	411	annot_exons
novel_circ_000111	53.0793	157.562	4	10	GeneID_100696549	NC_031965.1	+	7509885	7527248	486	annot_exons
novel_circ_000112	106.159	63.0249	8	4	GeneID_100695233	NC_031965.1	-	7773631	7776123	791	annot_exons
novel_circ_000115	39.8094	15.7562	3	1	GeneID_100695233	NC_031965.1	-	7783017	7791656	893	annot_exons
novel_circ_000116	39.8094	0	3	0	GeneID_100695233	NC_031965.1	-	7783017	7793681	2023	annot_exons
novel_circ_000117	66.3491	0	5	0	GeneID_100695233	NC_031965.1	-	7790513	7793681	1372	annot_exons
novel_circ_000118	53.0793	0	4	0	GeneID_100701659	NC_031965.1	+	8034212	8035254	416	annot_exons
novel_circ_000119	26.5396	47.2687	2	3	GeneID_100701386	NC_031965.1	-	8076961	8091515	318	annot_exons
novel_circ_000120	39.8094	94.5373	3	6	GeneID_100701386	NC_031965.1	-	8089256	8091515	234	annot_exons
novel_circ_000122	26.5396	0	2	0	GeneID_100693894	NC_031965.1	-	8384520	8387451	812	annot_exons
novel_circ_000123	0	31.5124	0	2	GeneID_100693366	NC_031965.1	-	8446197	8453707	635	annot_exons
novel_circ_000124	13.2698	63.0249	1	4	GeneID_100693366	NC_031965.1	-	8470421	8470873	276	annot_exons
novel_circ_000126	26.5396	47.2687	2	3	GeneID_100691922	NC_031965.1	-	8670378	8687193	4618	annot_exons
novel_circ_000127	26.5396	0	2	0	GeneID_100691922	NC_031965.1	-	8684942	8691715	572	annot_exons
novel_circ_000128	53.0793	63.0249	4	4	GeneID_100691922	NC_031965.1	-	8693675	8705757	1150	annot_exons
novel_circ_000129	53.0793	0	4	0	GeneID_100691922	NC_031965.1	-	8701346	8711740	879	annot_exons
novel_circ_000130	79.6189	220.587	6	14	GeneID_100691655	NC_031965.1	-	8825880	8856472	1113	annot_exons
novel_circ_000131	13.2698	63.0249	1	4	GeneID_100690579	NC_031965.1	-	9033374	9043476	2748	annot_exons
novel_circ_000132	0	31.5124	0	2	GeneID_100690579	NC_031965.1	-	9034188	9040485	2244	annot_exons
novel_circ_000133	79.6189	31.5124	6	2	GeneID_100690579	NC_031965.1	-	9038716	9041686	1984	annot_exons
novel_circ_000134	0	47.2687	0	3	GeneID_100712392	NC_031965.1	+	9212506	9215662	955	annot_exons
novel_circ_000136	0	31.5124	0	2	GeneID_100691845	NC_031965.1	-	9721216	9722240	262	annot_exons
novel_circ_000137	39.8094	15.7562	3	1	GeneID_100692112	NC_031965.1	-	9751208	9751767	359	annot_exons
novel_circ_000138	26.5396	0	2	0	GeneID_100693385	NC_031965.1	+	10058167	10061409	792	annot_exons
novel_circ_000139	0	31.5124	0	2	GeneID_100701590	NC_031965.1	+	10319032	10325627	1446	annot_exons
novel_circ_000140	305.206	709.03	23	45	GeneID_100711158	NC_031965.1	-	10660621	10662123	1384	annot_exons
novel_circ_000141	0	31.5124	0	2	GeneID_100708753	NC_031965.1	+	11029635	11031077	624	annot_exons
novel_circ_000142	39.8094	0	3	0	GeneID_100709294	NC_031965.1	-	11064830	11068252	280	annot_exons
novel_circ_000143	53.0793	204.831	4	13	GeneID_100709294	NC_031965.1	-	11068096	11069545	377	annot_exons
novel_circ_000144	26.5396	0	2	0	GeneID_100709832	NC_031965.1	+	11114061	11119912	774	annot_exons
novel_circ_000146	0	31.5124	0	2	GeneID_100710099	NC_031965.1	-	11206859	11213605	979	annot_exons
novel_circ_000147	26.5396	31.5124	2	2	GeneID_100690695	NC_031965.1	+	11306170	11308238	529	annot_exons
novel_circ_000148	0	31.5124	0	2	GeneID_100690695	NC_031965.1	+	11312842	11313842	597	annot_exons
novel_circ_000149	39.8094	15.7562	3	1	GeneID_100710362	NC_031965.1	-	11328461	11329992	368	annot_exons
novel_circ_000151	106.159	63.0249	8	4	GeneID_100700193	NC_031965.1	-	11586611	11595858	1980	annot_exons
novel_circ_000152	1419.87	2032.55	107	129	GeneID_100700193	NC_031965.1	-	11588853	11590234	1189	annot_exons
novel_circ_000153	26.5396	0	2	0	GeneID_100700193	NC_031965.1	-	11592611	11595858	447	annot_exons
novel_circ_000154	13.2698	31.5124	1	2	GeneID_100699925	NC_031965.1	+	11625489	11629668	832	annot_exons
novel_circ_000155	26.5396	0	2	0	GeneID_100699925	NC_031965.1	+	11628297	11629668	568	annot_exons
novel_circ_000156	0	31.5124	0	2	GeneID_100699925	NC_031965.1	+	11646189	11646828	371	annot_exons
novel_circ_000157	0	31.5124	0	2	GeneID_100699658	NC_031965.1	-	11658719	11669626	4503	annot_exons
novel_circ_000162	26.5396	47.2687	2	3	GeneID_102079875	NC_031965.1	+	12291387	12297559	1577	annot_exons
novel_circ_000163	39.8094	31.5124	3	2	GeneID_102079875	NC_031965.1	+	12295271	12297559	1391	annot_exons
novel_circ_000164	13.2698	31.5124	1	2	GeneID_102079875	NC_031965.1	+	12309966	12316790	2924	annot_exons
novel_circ_000166	53.0793	31.5124	4	2	GeneID_100694597	NC_031965.1	-	12350842	12355049	708	annot_exons
novel_circ_000167	39.8094	0	3	0	GeneID_100694597	NC_031965.1	-	12353898	12355049	399	annot_exons
novel_circ_000168	13.2698	31.5124	1	2	GeneID_100694597	NC_031965.1	-	12353898	12361991	935	annot_exons
novel_circ_000169	0	63.0249	0	4	GeneID_100694597	NC_031965.1	-	12358776	12361991	536	annot_exons
novel_circ_000175	26.5396	0	2	0	GeneID_100693785	NC_031965.1	+	12768125	12821483	510	annot_exons
novel_circ_000177	862.538	441.174	65	28	GeneID_100698850	NC_031965.1	-	13613594	13614260	232	annot_exons
novel_circ_000182	39.8094	126.05	3	8	GeneID_100698578	NC_031965.1	-	13955616	13956386	422	annot_exons
novel_circ_000183	53.0793	0	4	0	GeneID_100690554	NC_031965.1	-	14102416	14106368	378	annot_exons
novel_circ_000184	53.0793	0	4	0	GeneID_100690286	NC_031965.1	-	14128748	14137156	394	annot_exons
novel_circ_000187	39.8094	31.5124	3	2	GeneID_100710764	NC_031965.1	+	14275701	14308933	1117	annot_exons
novel_circ_000188	39.8094	47.2687	3	3	GeneID_100710496	NC_031965.1	-	14441958	14472997	612	annot_exons
novel_circ_000190	0	31.5124	0	2	GeneID_100710496	NC_031965.1	-	14470607	14493334	441	annot_exons
novel_circ_000191	26.5396	0	2	0	GeneID_100710496	NC_031965.1	-	14470607	14546393	992	annot_exons
novel_circ_000193	53.0793	31.5124	4	2	GeneID_100710496	NC_031965.1	-	14493169	14507729	558	annot_exons
novel_circ_000194	53.0793	0	4	0	GeneID_100710496	NC_031965.1	-	14493169	14546393	717	annot_exons
novel_circ_000195	53.0793	31.5124	4	2	GeneID_100709700	NC_031965.1	-	14841966	14843103	507	annot_exons
novel_circ_000196	26.5396	0	2	0	GeneID_100709700	NC_031965.1	-	14855670	14856404	541	annot_exons
novel_circ_000198	13.2698	78.7811	1	5	GeneID_100694056	NC_031965.1	-	15083565	15089803	368	annot_exons
novel_circ_000199	53.0793	0	4	0	GeneID_100708079	NC_031965.1	-	15127151	15127742	332	annot_exons
novel_circ_000200	53.0793	0	4	0	GeneID_100708079	NC_031965.1	-	15127151	15127823	413	annot_exons
novel_circ_000201	92.8887	157.562	7	10	GeneID_100708079	NC_031965.1	-	15127151	15129929	569	annot_exons
novel_circ_000203	39.8094	31.5124	3	2	GeneID_100707810	NC_031965.1	+	15241595	15248612	526	annot_exons
novel_circ_000206	66.3491	47.2687	5	3	GeneID_100691003	NC_031965.1	+	15705824	15720312	508	annot_exons
novel_circ_000207	132.698	63.0249	10	4	GeneID_100705147	NC_031965.1	+	15951961	15957759	216	annot_exons
novel_circ_000208	225.587	47.2687	17	3	GeneID_100704341	NC_031965.1	-	16107580	16110742	490	annot_exons
novel_circ_000209	26.5396	63.0249	2	4	GeneID_100706174	NC_031965.1	+	16334344	16336449	648	annot_exons
novel_circ_000210	0	31.5124	0	2	GeneID_100705642	NC_031965.1	+	16630686	16632177	247	annot_exons
novel_circ_000211	53.0793	0	4	0	GeneID_100704842	NC_031965.1	-	16764209	16769055	401	annot_exons
novel_circ_000212	26.5396	0	2	0	GeneID_100704842	NC_031965.1	-	16786990	16820447	792	annot_exons
novel_circ_000213	252.126	173.318	19	11	GeneID_100704842	NC_031965.1	-	16803008	16820447	665	annot_exons
novel_circ_000214	53.0793	31.5124	4	2	GeneID_100704842	NC_031965.1	-	16805101	16820447	579	annot_exons
novel_circ_000215	0	31.5124	0	2	GeneID_100704842	NC_031965.1	-	16805101	16837660	1619	annot_exons
novel_circ_000216	265.396	472.687	20	30	GeneID_100704842	NC_031965.1	-	16811612	16820447	445	annot_exons
novel_circ_000218	703.3	724.786	53	46	GeneID_100704842	NC_031965.1	-	16819815	16820447	226	annot_exons
novel_circ_000219	0	47.2687	0	3	GeneID_100704842	NC_031965.1	-	16819815	16837660	1266	annot_exons
novel_circ_000220	53.0793	173.318	4	11	GeneID_100704842	NC_031965.1	-	16825693	16829404	450	annot_exons
novel_circ_000221	53.0793	15.7562	4	1	GeneID_100704842	NC_031965.1	-	16825693	16837660	1040	annot_exons
novel_circ_000222	66.3491	31.5124	5	2	GeneID_100704842	NC_031965.1	-	16829235	16837660	760	annot_exons
novel_circ_000223	26.5396	0	2	0	GeneID_100704842	NC_031965.1	-	16832042	16837660	590	annot_exons
novel_circ_000224	39.8094	110.294	3	7	GeneID_100704842	NC_031965.1	-	16835679	16837660	448	annot_exons
novel_circ_000225	0	31.5124	0	2	GeneID_100704034	NC_031965.1	+	17104594	17109355	585	annot_exons
novel_circ_000226	0	47.2687	0	3	GeneID_100704034	NC_031965.1	+	17104594	17112488	729	annot_exons
novel_circ_000227	66.3491	15.7562	5	1	GeneID_100704034	NC_031965.1	+	17109199	17114756	383	annot_exons
novel_circ_000228	0	47.2687	0	3	GeneID_100704034	NC_031965.1	+	17112345	17124245	1140	annot_exons
novel_circ_000229	53.0793	31.5124	4	2	GeneID_100704034	NC_031965.1	+	17129679	17130541	196	annot_exons
novel_circ_000230	0	31.5124	0	2	GeneID_100704034	NC_031965.1	+	17132942	17134580	661	annot_exons
novel_circ_000231	26.5396	0	2	0	GeneID_100704034	NC_031965.1	+	17136932	17142842	435	annot_exons
novel_circ_000233	0	31.5124	0	2	GeneID_100698737	NC_031965.1	-	17566513	17573858	2631	annot_exons
novel_circ_000234	39.8094	0	3	0	GeneID_100698737	NC_031965.1	-	17566534	17570892	1909	annot_exons
novel_circ_000235	0	31.5124	0	2	GeneID_100697933	NC_031965.1	-	17719385	17737077	1970	annot_exons
novel_circ_000236	26.5396	0	2	0	GeneID_100697933	NC_031965.1	-	17728130	17730124	267	annot_exons
novel_circ_000237	79.6189	31.5124	6	2	GeneID_100697933	NC_031965.1	-	17728130	17737077	1847	annot_exons
novel_circ_000238	26.5396	31.5124	2	2	GeneID_100697404	NC_031965.1	+	17846641	17868479	849	annot_exons
novel_circ_000239	66.3491	15.7562	5	1	GeneID_100697404	NC_031965.1	+	17854816	17856061	215	annot_exons
novel_circ_000241	0	63.0249	0	4	GeneID_100697404	NC_031965.1	+	17854816	17860611	397	annot_exons
novel_circ_000242	172.508	31.5124	13	2	GeneID_100697404	NC_031965.1	+	17854816	17868479	745	annot_exons
novel_circ_000243	66.3491	0	5	0	GeneID_100697404	NC_031965.1	+	17854816	17894822	1004	annot_exons
novel_circ_000244	26.5396	0	2	0	GeneID_100697404	NC_031965.1	+	17868132	17894822	607	annot_exons
novel_circ_000245	26.5396	31.5124	2	2	GeneID_100697404	NC_031965.1	+	17873385	17901397	1012	annot_exons
novel_circ_000246	0	31.5124	0	2	GeneID_100697404	NC_031965.1	+	17894687	17901397	889	annot_exons
novel_circ_000248	0	31.5124	0	2	GeneID_100696074	NC_031965.1	+	18108334	18117492	475	annot_exons
novel_circ_000249	26.5396	0	2	0	GeneID_100696074	NC_031965.1	+	18123558	18138292	1995	annot_exons
novel_circ_000250	106.159	31.5124	8	2	GeneID_100696074	NC_031965.1	+	18131478	18140599	1392	annot_exons
novel_circ_000251	185.777	110.294	14	7	GeneID_100696074	NC_031965.1	+	18137454	18143712	1316	annot_exons
novel_circ_000252	26.5396	15.7562	2	1	GeneID_100694759	NC_031965.1	+	18176251	18203841	571	annot_exons
novel_circ_000253	172.508	47.2687	13	3	GeneID_100694759	NC_031965.1	+	18200263	18203841	449	annot_exons
novel_circ_000254	0	31.5124	0	2	GeneID_100694759	NC_031965.1	+	18230290	18270007	1068	annot_exons
novel_circ_000255	26.5396	0	2	0	GeneID_100694759	NC_031965.1	+	18250410	18270007	702	annot_exons
novel_circ_000256	0	110.294	0	7	GeneID_100694759	NC_031965.1	+	18269902	18278965	982	annot_exons
novel_circ_000258	0	31.5124	0	2	GeneID_100694224	NC_031965.1	+	18461885	18464521	1191	annot_exons
novel_circ_000259	0	63.0249	0	4	GeneID_100694224	NC_031965.1	+	18464432	18464961	246	annot_exons
novel_circ_000262	0	31.5124	0	2	GeneID_100693681	NC_031965.1	-	18747156	18754321	968	annot_exons
novel_circ_000263	0	63.0249	0	4	GeneID_102078235	NC_031965.1	-	18772878	18775296	1089	annot_exons
novel_circ_000264	53.0793	173.318	4	11	GeneID_102078235	NC_031965.1	-	18772878	18775299	1092	annot_exons
novel_circ_000266	13.2698	31.5124	1	2	GeneID_100693420	NC_031965.1	-	18811531	18814300	1427	annot_exons
novel_circ_000267	172.508	220.587	13	14	GeneID_100694490	NC_031965.1	-	18975521	18978697	934	annot_exons
novel_circ_000268	53.0793	0	4	0	GeneID_100694490	NC_031965.1	-	18977168	18981049	1171	annot_exons
novel_circ_000269	13.2698	31.5124	1	2	GeneID_100694490	NC_031965.1	-	19017054	19022696	490	annot_exons
novel_circ_000270	53.0793	0	4	0	GeneID_100694490	NC_031965.1	-	19017054	19043777	576	annot_exons
novel_circ_000271	172.508	267.856	13	17	GeneID_100693421	NC_031965.1	-	19219957	19229786	664	annot_exons
novel_circ_000272	0	63.0249	0	4	GeneID_100693421	NC_031965.1	-	19221972	19229786	351	annot_exons
novel_circ_000273	53.0793	31.5124	4	2	GeneID_100692874	NC_031965.1	-	19402950	19403968	144	annot_exons
novel_circ_000274	0	31.5124	0	2	GeneID_100692062	NC_031965.1	-	19554364	19555887	521	annot_exons
novel_circ_000275	26.5396	0	2	0	GeneID_100691255	NC_031965.1	+	19638210	19640037	794	annot_exons
novel_circ_000276	26.5396	0	2	0	GeneID_100690991	NC_031965.1	+	19696513	19702273	333	annot_exons
novel_circ_000277	0	31.5124	0	2	GeneID_100690991	NC_031965.1	+	19696513	19707377	507	annot_exons
novel_circ_000278	13.2698	63.0249	1	4	GeneID_100690991	NC_031965.1	+	19707109	19709176	554	annot_exons
novel_circ_000279	185.777	31.5124	14	2	GeneID_102076553	NC_031965.1	-	19978082	19978990	338	annot_exons
novel_circ_000280	0	31.5124	0	2	GeneID_102076553	NC_031965.1	-	20020908	20046485	726	annot_exons
novel_circ_000281	92.8887	15.7562	7	1	GeneID_102076553	NC_031965.1	-	20020908	20052324	3823	annot_exons
novel_circ_000282	145.968	220.587	11	14	GeneID_102076553	NC_031965.1	-	20045992	20052324	3591	annot_exons
novel_circ_000283	0	63.0249	0	4	GeneID_100690182	NC_031965.1	-	20355240	20358940	1408	annot_exons
novel_circ_000284	26.5396	0	2	0	GeneID_100712534	NC_031965.1	-	20381861	20407647	1625	annot_exons
novel_circ_000285	26.5396	0	2	0	GeneID_100711017	NC_031965.1	-	20426489	20427588	566	annot_exons
novel_circ_000286	106.159	94.5373	8	6	GeneID_100711017	NC_031965.1	-	20426489	20427590	568	annot_exons
novel_circ_000287	66.3491	31.5124	5	2	GeneID_100711017	NC_031965.1	-	20426770	20427590	471	annot_exons
novel_circ_000288	26.5396	157.562	2	10	GeneID_100712266	NC_031965.1	+	20444796	20447555	537	annot_exons
novel_circ_000289	26.5396	0	2	0	GeneID_100711729	NC_031965.1	+	20510991	20528621	1809	annot_exons
novel_circ_000290	0	78.7811	0	5	GeneID_100711457	NC_031965.1	-	20547714	20550525	412	annot_exons
novel_circ_000292	53.0793	47.2687	4	3	GeneID_100711457	NC_031965.1	-	20565203	20572263	1093	annot_exons
novel_circ_000294	39.8094	0	3	0	GeneID_100710655	NC_031965.1	+	20640011	20650232	429	annot_exons
novel_circ_000295	26.5396	157.562	2	10	GeneID_100709496	NC_031965.1	-	20847886	20852869	598	annot_exons
novel_circ_000296	26.5396	94.5373	2	6	GeneID_100709496	NC_031965.1	-	20847886	20892896	949	annot_exons
novel_circ_000297	0	31.5124	0	2	GeneID_100709496	NC_031965.1	-	20851476	20872051	488	annot_exons
novel_circ_000300	26.5396	0	2	0	GeneID_100708783	NC_031965.1	+	21055150	21059873	1644	annot_exons
novel_circ_000302	26.5396	0	2	0	GeneID_100707702	NC_031965.1	+	21204250	21208496	759	annot_exons
novel_circ_000303	0	31.5124	0	2	GeneID_100707702	NC_031965.1	+	21206534	21208698	838	annot_exons
novel_circ_000306	0	31.5124	0	2	GeneID_100705046	NC_031965.1	+	21394024	21449317	981	annot_exons
novel_circ_000307	26.5396	94.5373	2	6	GeneID_100705046	NC_031965.1	+	21427305	21436984	401	annot_exons
novel_circ_000310	66.3491	47.2687	5	3	GeneID_102077336	NC_031965.1	+	21627299	21629030	284	annot_exons
novel_circ_000311	0	31.5124	0	2	GeneID_100703422	NC_031965.1	+	21660662	21662363	287	annot_exons
novel_circ_000313	66.3491	0	5	0	GeneID_100703151	NC_031965.1	-	21889139	21890340	864	annot_exons
novel_circ_000314	53.0793	0	4	0	GeneID_100703151	NC_031965.1	-	21889139	21892329	1226	annot_exons
novel_circ_000315	13.2698	63.0249	1	4	GeneID_100703151	NC_031965.1	-	21889139	21897192	1435	annot_exons
novel_circ_000316	411.364	535.711	31	34	GeneID_100703151	NC_031965.1	-	21896984	21904295	407	annot_exons
novel_circ_000317	0	31.5124	0	2	GeneID_100702345	NC_031965.1	-	22545794	22547503	1052	annot_exons
novel_circ_000318	26.5396	0	2	0	GeneID_100700455	NC_031965.1	-	22611685	22616326	346	annot_exons
novel_circ_000319	53.0793	0	4	0	GeneID_100700455	NC_031965.1	-	22611685	22629723	587	annot_exons
novel_circ_000321	610.411	929.617	46	59	GeneID_100700179	NC_031965.1	-	22707287	22711375	956	annot_exons
novel_circ_000323	66.3491	47.2687	5	3	GeneID_100698835	NC_031965.1	-	22937592	22943498	405	annot_exons
novel_circ_000324	0	31.5124	0	2	GeneID_100698835	NC_031965.1	-	22939934	22943498	298	annot_exons
novel_circ_000325	0	31.5124	0	2	GeneID_100698036	NC_031965.1	-	23143620	23148354	549	annot_exons
novel_circ_000326	13.2698	31.5124	1	2	GeneID_100698036	NC_031965.1	-	23181231	23185983	883	annot_exons
novel_circ_000327	26.5396	0	2	0	GeneID_100698036	NC_031965.1	-	23190688	23195579	858	annot_exons
novel_circ_000328	53.0793	0	4	0	GeneID_100698036	NC_031965.1	-	23204343	23206210	383	annot_exons
novel_circ_000329	92.8887	0	7	0	GeneID_100698036	NC_031965.1	-	23237791	23239625	522	annot_exons
novel_circ_000330	39.8094	47.2687	3	3	GeneID_100698036	NC_031965.1	-	23245486	23252450	852	annot_exons
novel_circ_000331	0	31.5124	0	2	GeneID_100698036	NC_031965.1	-	23252310	23265109	727	annot_exons
novel_circ_000332	92.8887	63.0249	7	4	GeneID_100698036	NC_031965.1	-	23260148	23265109	586	annot_exons
novel_circ_000333	79.6189	47.2687	6	3	GeneID_100698036	NC_031965.1	-	23300304	23313445	594	annot_exons
novel_circ_000334	915.617	756.299	69	48	GeneID_100698036	NC_031965.1	-	23312158	23313445	403	annot_exons
novel_circ_000336	106.159	78.7811	8	5	GeneID_100694179	NC_031965.1	+	23835583	23841874	357	annot_exons
novel_circ_000338	106.159	15.7562	8	1	GeneID_100695244	NC_031965.1	-	23993027	23993536	437	annot_exons
novel_circ_000339	26.5396	31.5124	2	2	GeneID_100695244	NC_031965.1	-	24009534	24010533	640	annot_exons
novel_circ_000340	26.5396	0	2	0	GeneID_100706775	NC_031965.1	-	24117730	24118383	320	annot_exons
novel_circ_000341	0	31.5124	0	2	GeneID_100698166	NC_031965.1	+	24209247	24214686	474	annot_exons
novel_circ_000342	26.5396	0	2	0	GeneID_100698430	NC_031965.1	+	24266775	24272781	269	annot_exons
novel_circ_000343	26.5396	0	2	0	GeneID_100699774	NC_031965.1	-	24392248	24394402	585	annot_exons
novel_circ_000344	26.5396	78.7811	2	5	GeneID_102077314	NC_031965.1	-	24414990	24419249	1512	annot_exons
novel_circ_000345	13.2698	31.5124	1	2	GeneID_100700311	NC_031965.1	-	24468907	24470965	474	annot_exons
novel_circ_000347	305.206	441.174	23	28	GeneID_100701402	NC_031965.1	+	24566118	24569410	385	annot_exons
novel_circ_000348	0	31.5124	0	2	GeneID_100701673	NC_031965.1	-	24639781	24650134	3105	annot_exons
novel_circ_000349	0	63.0249	0	4	GeneID_100701673	NC_031965.1	-	24649958	24651074	299	annot_exons
novel_circ_000350	132.698	110.294	10	7	GeneID_100701673	NC_031965.1	-	24658243	24679524	1161	annot_exons
novel_circ_000351	26.5396	15.7562	2	1	GeneID_100701673	NC_031965.1	-	24660344	24679524	965	annot_exons
novel_circ_000352	26.5396	0	2	0	GeneID_100701673	NC_031965.1	-	24662146	24666903	456	annot_exons
novel_circ_000353	92.8887	47.2687	7	3	GeneID_100701673	NC_031965.1	-	24665509	24679524	515	annot_exons
novel_circ_000354	0	63.0249	0	4	GeneID_100701673	NC_031965.1	-	24665509	24685870	697	annot_exons
novel_circ_000356	92.8887	63.0249	7	4	GeneID_100701673	NC_031965.1	-	24679320	24685870	387	annot_exons
novel_circ_000357	66.3491	0	5	0	GeneID_100701673	NC_031965.1	-	24679320	24699372	1338	annot_exons
novel_circ_000358	119.428	63.0249	9	4	GeneID_100701673	NC_031965.1	-	24685689	24699372	1133	annot_exons
novel_circ_000360	199.047	110.294	15	7	GeneID_100703564	NC_031965.1	-	24857452	24862598	835	annot_exons
novel_circ_000361	0	31.5124	0	2	GeneID_100703564	NC_031965.1	-	24857452	24881254	1679	annot_exons
novel_circ_000362	0	31.5124	0	2	GeneID_100704106	NC_031965.1	-	25104914	25116630	648	annot_exons
novel_circ_000363	0	47.2687	0	3	GeneID_100704642	NC_031965.1	+	25342512	25352081	660	annot_exons
novel_circ_000364	0	31.5124	0	2	GeneID_100705181	NC_031965.1	+	25451816	25452225	323	annot_exons
novel_circ_000366	106.159	31.5124	8	2	GeneID_100698371	NC_031965.1	+	25758856	25776654	315	annot_exons
novel_circ_000367	835.998	393.905	63	25	GeneID_100698371	NC_031965.1	+	25810822	25813389	330	annot_exons
novel_circ_000368	26.5396	94.5373	2	6	GeneID_100698371	NC_031965.1	+	25810822	25825981	600	annot_exons
novel_circ_000369	79.6189	78.7811	6	5	GeneID_100698371	NC_031965.1	+	25810822	25830709	1230	annot_exons
novel_circ_000370	398.094	346.637	30	22	GeneID_100698371	NC_031965.1	+	25810822	25836621	1646	annot_exons
novel_circ_000371	159.238	94.5373	12	6	GeneID_100698371	NC_031965.1	+	25810822	25851027	2160	annot_exons
novel_circ_000372	79.6189	31.5124	6	2	GeneID_100698371	NC_031965.1	+	25810822	25857079	2291	annot_exons
novel_circ_000373	0	47.2687	0	3	GeneID_100698371	NC_031965.1	+	25810822	25872638	2400	annot_exons
novel_circ_000374	13.2698	31.5124	1	2	GeneID_100698371	NC_031965.1	+	25810822	25872647	2409	annot_exons
novel_circ_000375	79.6189	0	6	0	GeneID_100698371	NC_031965.1	+	25813257	25836621	1449	annot_exons
novel_circ_000376	0	31.5124	0	2	GeneID_100698371	NC_031965.1	+	25813257	25851027	1963	annot_exons
novel_circ_000377	66.3491	47.2687	5	3	GeneID_100698371	NC_031965.1	+	25825712	25836621	1316	annot_exons
novel_circ_000378	26.5396	31.5124	2	2	GeneID_100698371	NC_031965.1	+	25825712	25851027	1830	annot_exons
novel_circ_000379	0	31.5124	0	2	GeneID_100698371	NC_031965.1	+	25825712	25857079	1961	annot_exons
novel_circ_000380	53.0793	78.7811	4	5	GeneID_100698371	NC_031965.1	+	25836033	25836621	416	annot_exons
novel_circ_000381	53.0793	0	4	0	GeneID_100698371	NC_031965.1	+	25836033	25872647	1179	annot_exons
novel_circ_000382	265.396	15.7562	20	1	GeneID_100698371	NC_031965.1	+	25845720	25851027	514	annot_exons
novel_circ_000383	26.5396	0	2	0	GeneID_100698371	NC_031965.1	+	25850068	25872638	549	annot_exons
novel_circ_000384	0	63.0249	0	4	GeneID_100698371	NC_031965.1	+	25850068	25872647	558	annot_exons
novel_circ_000388	384.825	362.393	29	23	GeneID_100699439	NC_031965.1	-	26232480	26236508	1266	annot_exons
novel_circ_000389	0	31.5124	0	2	GeneID_100699439	NC_031965.1	-	26240943	26242418	514	annot_exons
novel_circ_000390	79.6189	15.7562	6	1	GeneID_100699439	NC_031965.1	-	26254493	26261542	1346	annot_exons
novel_circ_000391	0	31.5124	0	2	GeneID_100700242	NC_031965.1	+	26350522	26350902	295	annot_exons
novel_circ_000392	477.713	567.224	36	36	GeneID_100700520	NC_031965.1	+	26450320	26451462	312	annot_exons
novel_circ_000394	39.8094	0	3	0	GeneID_100696842	NC_031965.1	-	26719864	26720727	491	annot_exons
novel_circ_000395	26.5396	0	2	0	GeneID_100696842	NC_031965.1	-	26727605	26728660	521	annot_exons
novel_circ_000396	106.159	47.2687	8	3	GeneID_100703767	NC_031965.1	+	27051053	27056933	541	annot_exons
novel_circ_000397	106.159	15.7562	8	1	GeneID_100703767	NC_031965.1	+	27051053	27061500	838	annot_exons
novel_circ_000399	66.3491	0	5	0	GeneID_100708842	NC_031965.1	+	27426196	27435830	1026	annot_exons
novel_circ_000400	39.8094	141.806	3	9	GeneID_100708842	NC_031965.1	+	27430902	27435830	678	annot_exons
novel_circ_000401	26.5396	47.2687	2	3	GeneID_100709925	NC_031965.1	-	27561346	27565303	1168	annot_exons
novel_circ_000403	13.2698	63.0249	1	4	GeneID_100710449	NC_031965.1	+	27732200	27751149	825	annot_exons
novel_circ_000404	145.968	110.294	11	7	GeneID_100710449	NC_031965.1	+	27736139	27755186	975	annot_exons
novel_circ_000405	39.8094	0	3	0	GeneID_100710449	NC_031965.1	+	27745188	27746394	322	annot_exons
novel_circ_000406	159.238	126.05	12	8	GeneID_100710449	NC_031965.1	+	27745188	27755186	895	annot_exons
novel_circ_000407	13.2698	31.5124	1	2	GeneID_100710449	NC_031965.1	+	27746247	27750502	361	annot_exons
novel_circ_000408	145.968	94.5373	11	6	GeneID_100710449	NC_031965.1	+	27746247	27755186	721	annot_exons
novel_circ_000409	13.2698	31.5124	1	2	GeneID_100710449	NC_031965.1	+	27746250	27755186	718	annot_exons
novel_circ_000410	26.5396	0	2	0	GeneID_100710449	NC_031965.1	+	27755043	27759419	294	annot_exons
novel_circ_000411	39.8094	0	3	0	GeneID_100711792	NC_031965.1	-	28410874	28435213	469	annot_exons
novel_circ_000412	53.0793	0	4	0	GeneID_100711792	NC_031965.1	-	28410874	28438952	595	annot_exons
novel_circ_000413	26.5396	0	2	0	GeneID_100711792	NC_031965.1	-	28426984	28435213	344	annot_exons
novel_circ_000416	26.5396	31.5124	2	2	GeneID_100712059	NC_031965.1	+	28564066	28576143	666	annot_exons
novel_circ_000417	26.5396	0	2	0	GeneID_100712059	NC_031965.1	+	28573975	28580430	843	annot_exons
novel_circ_000418	26.5396	0	2	0	GeneID_100702680	NC_031965.1	-	29105898	29110501	814	annot_exons
novel_circ_000419	26.5396	0	2	0	GeneID_100703219	NC_031965.1	-	29142594	29147390	971	annot_exons
novel_circ_000421	145.968	78.7811	11	5	GeneID_100691314	NC_031965.1	+	29447323	29449573	771	annot_exons
novel_circ_000422	0	31.5124	0	2	GeneID_100691314	NC_031965.1	+	29453321	29458713	1511	annot_exons
novel_circ_000423	185.777	63.0249	14	4	GeneID_109202667	NC_031965.1	+	29498729	29501565	519	annot_exons
novel_circ_000424	0	31.5124	0	2	GeneID_109202667	NC_031965.1	+	29498729	29502880	729	annot_exons
novel_circ_000425	119.428	0	9	0	GeneID_109202667	NC_031965.1	+	29498729	29508561	920	annot_exons
novel_circ_000426	66.3491	0	5	0	GeneID_109202667	NC_031965.1	+	29498729	29515282	1090	annot_exons
novel_circ_000427	0	31.5124	0	2	GeneID_109202667	NC_031965.1	+	29498729	29527945	1347	annot_exons
novel_circ_000428	13.2698	126.05	1	8	GeneID_109202667	NC_031965.1	+	29498729	29549998	2424	annot_exons
novel_circ_000429	0	63.0249	0	4	GeneID_109202667	NC_031965.1	+	29515113	29549998	1504	annot_exons
novel_circ_000430	26.5396	0	2	0	GeneID_109202667	NC_031965.1	+	29523556	29534144	1211	annot_exons
novel_circ_000431	159.238	189.075	12	12	GeneID_109202667	NC_031965.1	+	29523556	29549998	1334	annot_exons
novel_circ_000432	185.777	220.587	14	14	GeneID_100692121	NC_031965.1	-	29589184	29594169	451	annot_exons
novel_circ_000434	92.8887	31.5124	7	2	GeneID_100694561	NC_031965.1	-	30364422	30369009	447	annot_exons
novel_circ_000435	26.5396	47.2687	2	3	GeneID_100694561	NC_031965.1	-	30368017	30369009	227	annot_exons
novel_circ_000436	53.0793	0	4	0	GeneID_100694561	NC_031965.1	-	30394281	30395162	265	annot_exons
novel_circ_000437	53.0793	0	4	0	GeneID_100694828	NC_031965.1	-	30411672	30428780	908	annot_exons
novel_circ_000440	26.5396	0	2	0	GeneID_100696408	NC_031965.1	-	30717423	30718284	458	annot_exons
novel_circ_000442	26.5396	31.5124	2	2	GeneID_100697740	NC_031965.1	+	30953667	30956931	505	annot_exons
novel_circ_000444	26.5396	0	2	0	GeneID_100698004	NC_031965.1	-	31183425	31266504	1140	annot_exons
novel_circ_000445	119.428	236.343	9	15	GeneID_100698004	NC_031965.1	-	31196352	31203113	548	annot_exons
novel_circ_000446	79.6189	157.562	6	10	GeneID_100698004	NC_031965.1	-	31196352	31220399	737	annot_exons
novel_circ_000447	0	31.5124	0	2	GeneID_100698004	NC_031965.1	-	31196352	31266504	884	annot_exons
novel_circ_000448	0	47.2687	0	3	GeneID_100698004	NC_031965.1	-	31198517	31220399	493	annot_exons
novel_circ_000449	0	31.5124	0	2	GeneID_100698004	NC_031965.1	-	31198517	31278479	1395	annot_exons
novel_circ_000450	26.5396	0	2	0	GeneID_100698004	NC_031965.1	-	31202983	31291290	1291	annot_exons
novel_circ_000451	39.8094	0	3	0	GeneID_100698004	NC_031965.1	-	31220211	31270120	651	annot_exons
novel_circ_000452	225.587	78.7811	17	5	GeneID_100698004	NC_031965.1	-	31264070	31270120	462	annot_exons
novel_circ_000453	119.428	31.5124	9	2	GeneID_100698004	NC_031965.1	-	31264070	31278479	902	annot_exons
novel_circ_000454	26.5396	0	2	0	GeneID_100698004	NC_031965.1	-	31264079	31278479	893	annot_exons
novel_circ_000455	185.777	78.7811	14	5	GeneID_100698004	NC_031965.1	-	31276093	31278479	440	annot_exons
novel_circ_000456	53.0793	63.0249	4	4	GeneID_100698004	NC_031965.1	-	31276093	31291290	509	annot_exons
novel_circ_000457	26.5396	0	2	0	GeneID_100700960	NC_031965.1	-	31891804	31893030	397	annot_exons
novel_circ_000458	26.5396	0	2	0	GeneID_100710631	NC_031965.1	-	32054169	32065636	1235	annot_exons
novel_circ_000459	26.5396	0	2	0	GeneID_100703123	NC_031965.1	-	32106824	32107963	1044	annot_exons
novel_circ_000460	26.5396	31.5124	2	2	GeneID_102083000	NC_031965.1	-	32136999	32142647	654	annot_exons
novel_circ_000461	225.587	346.637	17	22	GeneID_102083000	NC_031965.1	-	32141150	32142647	425	annot_exons
novel_circ_000462	159.238	220.587	12	14	GeneID_102083000	NC_031965.1	-	32141150	32146202	626	annot_exons
novel_circ_000463	106.159	15.7562	8	1	GeneID_100710896	NC_031965.1	-	32165222	32171515	326	annot_exons
novel_circ_000464	39.8094	31.5124	3	2	GeneID_100710896	NC_031965.1	-	32189640	32251515	636	annot_exons
novel_circ_000465	39.8094	0	3	0	GeneID_100710896	NC_031965.1	-	32211020	32213260	260	annot_exons
novel_circ_000466	39.8094	31.5124	3	2	GeneID_100710896	NC_031965.1	-	32211020	32251515	513	annot_exons
novel_circ_000467	26.5396	0	2	0	GeneID_100703670	NC_031965.1	+	32317337	32328019	544	annot_exons
novel_circ_000468	26.5396	15.7562	2	1	GeneID_100703670	NC_031965.1	+	32317337	32337222	902	annot_exons
novel_circ_000470	79.6189	0	6	0	GeneID_100711431	NC_031965.1	-	32954957	32977900	3286	annot_exons
novel_circ_000471	26.5396	0	2	0	GeneID_100711431	NC_031965.1	-	32955604	32963423	2211	annot_exons
novel_circ_000472	437.904	378.149	33	24	GeneID_100711431	NC_031965.1	-	32959772	32963423	1959	annot_exons
novel_circ_000473	79.6189	31.5124	6	2	GeneID_100711431	NC_031965.1	-	32959772	32984150	2683	annot_exons
novel_circ_000474	743.11	1024.15	56	65	GeneID_100711431	NC_031965.1	-	32970973	32977900	604	annot_exons
novel_circ_000475	145.968	141.806	11	9	GeneID_100711431	NC_031965.1	-	32970973	32984150	724	annot_exons
novel_circ_000476	26.5396	31.5124	2	2	GeneID_100711431	NC_031965.1	-	32970973	33009495	1016	annot_exons
novel_circ_000477	0	94.5373	0	6	GeneID_100711431	NC_031965.1	-	32977278	32977900	356	annot_exons
novel_circ_000479	79.6189	141.806	6	9	GeneID_100705016	NC_031965.1	+	33319308	33320097	709	annot_exons
novel_circ_000480	132.698	0	10	0	GeneID_100705016	NC_031965.1	+	33321243	33323978	1217	annot_exons
novel_circ_000482	39.8094	78.7811	3	5	GeneID_100690420	NC_031965.1	+	34092741	34098922	872	annot_exons
novel_circ_000483	0	31.5124	0	2	GeneID_100690420	NC_031965.1	+	34095047	34095736	352	annot_exons
novel_circ_000485	132.698	283.612	10	18	GeneID_102078972	NC_031965.1	+	34342069	34346781	629	annot_exons
novel_circ_000486	119.428	15.7562	9	1	GeneID_102078972	NC_031965.1	+	34342069	34379060	1134	annot_exons
novel_circ_000487	769.649	141.806	58	9	GeneID_102078972	NC_031965.1	+	34353866	34360875	362	annot_exons
novel_circ_000488	1446.41	661.761	109	42	GeneID_102078972	NC_031965.1	+	34353866	34379060	505	annot_exons
novel_circ_000489	26.5396	15.7562	2	1	GeneID_102078972	NC_031965.1	+	34360626	34379060	393	annot_exons
novel_circ_000490	66.3491	31.5124	5	2	GeneID_102078972	NC_031965.1	+	34393563	34404944	854	annot_exons
novel_circ_000491	132.698	31.5124	10	2	GeneID_102078972	NC_031965.1	+	34408073	34421309	709	annot_exons
novel_circ_000492	0	31.5124	0	2	GeneID_102078972	NC_031965.1	+	34511029	34545144	1039	annot_exons
novel_circ_000493	0	31.5124	0	2	GeneID_102078972	NC_031965.1	+	34528063	34536115	446	annot_exons
novel_circ_000494	26.5396	0	2	0	GeneID_102078972	NC_031965.1	+	34535935	34545144	426	annot_exons
novel_circ_000496	39.8094	0	3	0	GeneID_100707143	NC_031965.1	-	34595362	34612940	517	annot_exons
novel_circ_000497	53.0793	0	4	0	GeneID_100707143	NC_031965.1	-	34612809	34623011	599	annot_exons
novel_circ_000498	0	31.5124	0	2	GeneID_100707143	NC_031965.1	-	34612809	34644811	1217	annot_exons
novel_circ_000499	26.5396	157.562	2	10	GeneID_100707412	NC_031965.1	-	34701391	34706014	2549	annot_exons
novel_circ_000500	53.0793	15.7562	4	1	GeneID_100707950	NC_031965.1	-	34794396	34797290	1069	annot_exons
novel_circ_000501	79.6189	0	6	0	GeneID_100709027	NC_031965.1	-	34913471	34915246	356	annot_exons
novel_circ_000502	26.5396	0	2	0	GeneID_109202851	NC_031965.1	+	35241025	35246235	671	annot_exons
novel_circ_000503	26.5396	0	2	0	GeneID_109202851	NC_031965.1	+	35243956	35246235	559	annot_exons
novel_circ_000504	0	31.5124	0	2	GeneID_100710633	NC_031965.1	-	35526530	35529567	525	annot_exons
novel_circ_000505	13.2698	31.5124	1	2	GeneID_100690155	NC_031965.1	-	35886623	35889624	1179	annot_exons
novel_circ_000506	66.3491	0	5	0	GeneID_100691227	NC_031965.1	-	36088985	36090868	1037	annot_exons
novel_circ_000507	26.5396	0	2	0	GeneID_100691421	NC_031965.1	-	36588776	36590800	280	annot_exons
novel_circ_000508	26.5396	0	2	0	GeneID_100691421	NC_031965.1	-	36634577	36636278	440	annot_exons
novel_circ_000509	145.968	141.806	11	9	GeneID_100691689	NC_031965.1	-	36668225	36669734	979	annot_exons
novel_circ_000511	53.0793	63.0249	4	4	GeneID_100691689	NC_031965.1	-	36687496	36695271	858	annot_exons
novel_circ_000512	26.5396	47.2687	2	3	GeneID_100691689	NC_031965.1	-	36707281	36747194	613	annot_exons
novel_circ_000513	26.5396	0	2	0	GeneID_100691689	NC_031965.1	-	36718618	36747194	538	annot_exons
novel_circ_000514	13.2698	63.0249	1	4	GeneID_100691689	NC_031965.1	-	36734633	36747194	411	annot_exons
novel_circ_000516	0	31.5124	0	2	GeneID_100691959	NC_031965.1	+	36848621	36849392	450	annot_exons
novel_circ_000519	185.777	173.318	14	11	GeneID_100694558	NC_031965.1	+	37083631	37084779	810	annot_exons
novel_circ_000520	53.0793	0	4	0	GeneID_100694558	NC_031965.1	+	37083631	37094090	1470	annot_exons
novel_circ_000521	92.8887	110.294	7	7	GeneID_100697204	NC_031965.1	+	37592882	37610474	190	annot_exons
novel_circ_000522	92.8887	0	7	0	GeneID_100697204	NC_031965.1	+	37592882	37610544	225	annot_exons
novel_circ_000523	92.8887	0	7	0	GeneID_100697204	NC_031965.1	+	37592882	37638619	325	annot_exons
novel_circ_000525	39.8094	63.0249	3	4	GeneID_100697204	NC_031965.1	+	37700876	37710035	1908	annot_exons
novel_circ_000531	0	31.5124	0	2	GeneID_100708216	NC_031966.1	-	2350405	2358706	1411	annot_exons
novel_circ_000532	26.5396	0	2	0	GeneID_100708216	NC_031966.1	-	2354195	2358706	685	annot_exons
novel_circ_000533	39.8094	0	3	0	GeneID_102082998	NC_031966.1	+	2382827	2385946	557	annot_exons
novel_circ_000534	106.159	126.05	8	8	GeneID_100709020	NC_031966.1	+	2455803	2456473	556	annot_exons
novel_circ_000537	291.936	330.881	22	21	GeneID_100710800	NC_031966.1	+	2622507	2641383	2767	annot_exons
novel_circ_000538	650.221	772.055	49	49	GeneID_100710800	NC_031966.1	+	2629032	2641383	2545	annot_exons
novel_circ_000542	106.159	94.5373	8	6	GeneID_100711066	NC_031966.1	+	2683520	2686228	480	annot_exons
novel_circ_000543	0	63.0249	0	4	GeneID_100695335	NC_031966.1	+	2728605	2735316	843	annot_exons
novel_circ_000544	0	31.5124	0	2	GeneID_102081539	NC_031966.1	+	3045616	3046956	272	annot_exons
novel_circ_000545	39.8094	0	3	0	GeneID_100691030	NC_031966.1	-	3479918	3481827	1815	annot_exons
novel_circ_000546	0	63.0249	0	4	GeneID_100691030	NC_031966.1	-	3479918	3490796	2146	annot_exons
novel_circ_000548	26.5396	31.5124	2	2	GeneID_100691836	NC_031966.1	+	3545674	3564553	874	annot_exons
novel_circ_000549	238.857	299.368	18	19	GeneID_100711650	NC_031966.1	+	4301928	4307562	316	annot_exons
novel_circ_000550	132.698	15.7562	10	1	GeneID_100711650	NC_031966.1	+	4304909	4307562	219	annot_exons
novel_circ_000551	106.159	31.5124	8	2	GeneID_100711921	NC_031966.1	+	4667583	4670006	744	annot_exons
novel_circ_000552	106.159	110.294	8	7	GeneID_100707986	NC_031966.1	+	4752967	4754546	476	annot_exons
novel_circ_000553	53.0793	94.5373	4	6	GeneID_100707986	NC_031966.1	+	4757352	4758721	295	annot_exons
novel_circ_000554	53.0793	31.5124	4	2	GeneID_100707986	NC_031966.1	+	4757352	4773570	722	annot_exons
novel_circ_000555	185.777	220.587	14	14	GeneID_100707986	NC_031966.1	+	4795097	4802912	504	annot_exons
novel_circ_000556	159.238	63.0249	12	4	GeneID_100707986	NC_031966.1	+	4801056	4802912	306	annot_exons
novel_circ_000557	26.5396	0	2	0	GeneID_100708792	NC_031966.1	+	4841962	4844636	1125	annot_exons
novel_circ_000559	53.0793	0	4	0	GeneID_100697342	NC_031966.1	+	6113292	6125718	1268	annot_exons
novel_circ_000560	39.8094	31.5124	3	2	GeneID_100697342	NC_031966.1	+	6115411	6122355	794	annot_exons
novel_circ_000561	26.5396	0	2	0	GeneID_100697608	NC_031966.1	-	6197140	6241518	4138	annot_exons
novel_circ_000564	26.5396	0	2	0	GeneID_100697608	NC_031966.1	-	6238583	6262559	5477	annot_exons
novel_circ_000566	0	31.5124	0	2	GeneID_100697608	NC_031966.1	-	6248733	6250109	487	annot_exons
novel_circ_000567	66.3491	78.7811	5	5	GeneID_100697608	NC_031966.1	-	6257831	6259155	520	annot_exons
novel_circ_000568	0	31.5124	0	2	GeneID_100697608	NC_031966.1	-	6257831	6262559	579	annot_exons
novel_circ_000569	636.951	803.567	48	51	GeneID_100697608	NC_031966.1	-	6267931	6274379	3579	annot_exons
novel_circ_000570	0	31.5124	0	2	GeneID_100692713	NC_031966.1	+	6338513	6338953	349	annot_exons
novel_circ_000571	26.5396	0	2	0	GeneID_100697877	NC_031966.1	-	6373533	6380342	362	annot_exons
novel_circ_000572	92.8887	94.5373	7	6	GeneID_100697877	NC_031966.1	-	6373533	6418261	875	annot_exons
novel_circ_000573	26.5396	15.7562	2	1	GeneID_100697877	NC_031966.1	-	6394085	6395618	221	annot_exons
novel_circ_000574	0	110.294	0	7	GeneID_100697877	NC_031966.1	-	6402695	6418261	292	annot_exons
novel_circ_000575	0	31.5124	0	2	GeneID_100700015	NC_031966.1	+	6991874	6994966	244	annot_exons
novel_circ_000577	318.476	598.736	24	38	GeneID_100700286	NC_031966.1	+	7477096	7484489	3022	annot_exons
novel_circ_000582	39.8094	15.7562	3	1	GeneID_100694511	NC_031966.1	-	8722261	8730200	512	annot_exons
novel_circ_000583	26.5396	15.7562	2	1	GeneID_100694511	NC_031966.1	-	8744444	8766450	810	annot_exons
novel_circ_000584	185.777	220.587	14	14	GeneID_100694511	NC_031966.1	-	8755586	8766450	619	annot_exons
novel_circ_000585	809.459	850.836	61	54	GeneID_100694511	NC_031966.1	-	8762411	8766450	458	annot_exons
novel_circ_000586	53.0793	0	4	0	GeneID_100694511	NC_031966.1	-	8764240	8766450	324	annot_exons
novel_circ_000588	0	31.5124	0	2	GeneID_100695038	NC_031966.1	+	9027336	9062225	791	annot_exons
novel_circ_000589	0	47.2687	0	3	GeneID_100695038	NC_031966.1	+	9061325	9066926	424	annot_exons
novel_circ_000595	0	31.5124	0	2	GeneID_100694047	NC_031966.1	-	9492931	9493311	260	annot_exons
novel_circ_000596	26.5396	31.5124	2	2	GeneID_100694047	NC_031966.1	-	9498441	9505750	370	annot_exons
novel_circ_000597	53.0793	47.2687	4	3	GeneID_100698744	NC_031966.1	-	10039434	10041169	585	annot_exons
novel_circ_000598	26.5396	0	2	0	GeneID_100698744	NC_031966.1	-	10039434	10049153	812	annot_exons
novel_circ_000600	0	63.0249	0	4	GeneID_100690275	NC_031966.1	+	10165291	10167297	433	annot_exons
novel_circ_000601	0	31.5124	0	2	GeneID_100712359	NC_031966.1	-	10522626	10531789	5195	annot_exons
novel_circ_000602	26.5396	0	2	0	GeneID_100712359	NC_031966.1	-	10528783	10545066	1586	annot_exons
novel_circ_000603	26.5396	78.7811	2	5	GeneID_100712359	NC_031966.1	-	10542409	10554997	1843	annot_exons
novel_circ_000604	66.3491	31.5124	5	2	GeneID_100712359	NC_031966.1	-	10548153	10549378	613	annot_exons
novel_circ_000605	26.5396	0	2	0	GeneID_100697410	NC_031966.1	+	10710522	10727438	1347	annot_exons
novel_circ_000607	0	31.5124	0	2	GeneID_100711287	NC_031966.1	+	11656964	11667729	1736	annot_exons
novel_circ_000608	0	47.2687	0	3	GeneID_100711287	NC_031966.1	+	11656964	11680404	3761	annot_exons
novel_circ_000609	53.0793	0	4	0	GeneID_100711287	NC_031966.1	+	11674792	11677213	605	annot_exons
novel_circ_000610	53.0793	15.7562	4	1	GeneID_100692338	NC_031966.1	-	11798032	11798553	93	annot_exons
novel_circ_000611	199.047	94.5373	15	6	GeneID_100692338	NC_031966.1	-	11838380	11843771	265	annot_exons
novel_circ_000613	26.5396	0	2	0	GeneID_100691888	NC_031966.1	-	11919178	11984960	807	annot_exons
novel_circ_000614	26.5396	31.5124	2	2	GeneID_100691888	NC_031966.1	-	11928137	11947107	380	annot_exons
novel_circ_000615	53.0793	15.7562	4	1	GeneID_100691888	NC_031966.1	-	11933909	11984960	399	annot_exons
novel_circ_000616	26.5396	63.0249	2	4	GeneID_100709961	NC_031966.1	+	12200743	12206681	318	annot_exons
novel_circ_000617	0	63.0249	0	4	GeneID_100709961	NC_031966.1	+	12271585	12277836	383	annot_exons
novel_circ_000618	0	31.5124	0	2	GeneID_100709961	NC_031966.1	+	12275871	12277836	233	annot_exons
novel_circ_000619	26.5396	0	2	0	GeneID_100709689	NC_031966.1	-	12445604	12446400	395	annot_exons
novel_circ_000621	26.5396	0	2	0	GeneID_100709689	NC_031966.1	-	12448057	12450276	961	annot_exons
novel_circ_000622	0	31.5124	0	2	GeneID_100709689	NC_031966.1	-	12449170	12449589	269	annot_exons
novel_circ_000624	13.2698	31.5124	1	2	GeneID_100709150	NC_031966.1	-	12593812	12596292	1350	annot_exons
novel_circ_000627	66.3491	63.0249	5	4	GeneID_100534557	NC_031966.1	-	12852179	12854607	578	annot_exons
novel_circ_000628	53.0793	31.5124	4	2	GeneID_100534557	NC_031966.1	-	12852179	12860917	818	annot_exons
novel_circ_000630	92.8887	0	7	0	GeneID_100708153	NC_031966.1	-	12902344	12919692	1072	annot_exons
novel_circ_000631	66.3491	78.7811	5	5	GeneID_100708153	NC_031966.1	-	12902344	12922739	1201	annot_exons
novel_circ_000632	79.6189	0	6	0	GeneID_100708153	NC_031966.1	-	12905778	12919692	779	annot_exons
novel_circ_000633	119.428	31.5124	9	2	GeneID_100708153	NC_031966.1	-	12905778	12922739	908	annot_exons
novel_circ_000634	26.5396	94.5373	2	6	GeneID_100708153	NC_031966.1	-	12912653	12922739	531	annot_exons
novel_circ_000635	464.444	504.199	35	32	GeneID_100707075	NC_031966.1	+	13082534	13085265	766	annot_exons
novel_circ_000636	13.2698	31.5124	1	2	GeneID_100707075	NC_031966.1	+	13082534	13131354	1269	annot_exons
novel_circ_000637	0	31.5124	0	2	GeneID_100707075	NC_031966.1	+	13131129	13149415	806	annot_exons
novel_circ_000638	26.5396	0	2	0	GeneID_100707075	NC_031966.1	+	13139412	13157523	1286	annot_exons
novel_circ_000639	13.2698	31.5124	1	2	GeneID_100707075	NC_031966.1	+	13153543	13157523	706	annot_exons
novel_circ_000640	39.8094	31.5124	3	2	GeneID_100707075	NC_031966.1	+	13153543	13164243	892	annot_exons
novel_circ_000641	26.5396	0	2	0	GeneID_100707075	NC_031966.1	+	13164058	13178389	1389	annot_exons
novel_circ_000642	0	31.5124	0	2	GeneID_100707075	NC_031966.1	+	13169265	13173986	337	annot_exons
novel_circ_000644	66.3491	31.5124	5	2	GeneID_100705216	NC_031966.1	+	14178139	14180561	536	annot_exons
novel_circ_000647	119.428	47.2687	9	3	GeneID_100703331	NC_031966.1	+	14657847	14666299	534	annot_exons
novel_circ_000648	39.8094	15.7562	3	1	GeneID_100703331	NC_031966.1	+	14663473	14669449	514	annot_exons
novel_circ_000649	0	31.5124	0	2	GeneID_100703331	NC_031966.1	+	14666225	14669449	363	annot_exons
novel_circ_000650	53.0793	15.7562	4	1	GeneID_100703331	NC_031966.1	+	14677961	14698631	1416	annot_exons
novel_circ_000652	119.428	157.562	9	10	GeneID_100709872	NC_031966.1	+	15362650	15411201	651	annot_exons
novel_circ_000653	79.6189	0	6	0	GeneID_100709872	NC_031966.1	+	15362650	15425028	1305	annot_exons
novel_circ_000654	26.5396	0	2	0	GeneID_100709872	NC_031966.1	+	15362650	15432265	1527	annot_exons
novel_circ_000655	0	31.5124	0	2	GeneID_100709872	NC_031966.1	+	15362650	15447651	2019	annot_exons
novel_circ_000656	53.0793	47.2687	4	3	GeneID_100709872	NC_031966.1	+	15419937	15439469	1205	annot_exons
novel_circ_000657	13.2698	63.0249	1	4	GeneID_100709872	NC_031966.1	+	15432151	15439469	444	annot_exons
novel_circ_000658	225.587	189.075	17	12	GeneID_100711741	NC_031966.1	-	15594459	15605755	1187	annot_exons
novel_circ_000659	225.587	189.075	17	12	GeneID_100711741	NC_031966.1	-	15600779	15605755	500	annot_exons
novel_circ_000660	53.0793	15.7562	4	1	GeneID_100712010	NC_031966.1	+	15750491	15756684	282	annot_exons
novel_circ_000661	26.5396	31.5124	2	2	GeneID_100712010	NC_031966.1	+	15866403	15959718	1102	annot_exons
novel_circ_000663	185.777	173.318	14	11	GeneID_100712010	NC_031966.1	+	15948743	15951428	342	annot_exons
novel_circ_000664	185.777	63.0249	14	4	GeneID_100712010	NC_031966.1	+	15948743	15959718	472	annot_exons
novel_circ_000667	331.745	456.93	25	29	GeneID_100690734	NC_031966.1	-	16252982	16255006	244	annot_exons
novel_circ_000668	0	31.5124	0	2	GeneID_100693782	NC_031966.1	+	16631586	16633692	451	annot_exons
novel_circ_000669	53.0793	0	4	0	GeneID_100693782	NC_031966.1	+	16631655	16633669	359	annot_exons
novel_circ_000672	26.5396	78.7811	2	5	GeneID_100690461	NC_031966.1	-	16645306	16647138	1099	annot_exons
novel_circ_000673	66.3491	0	5	0	GeneID_100694053	NC_031966.1	-	16656452	16660164	996	annot_exons
novel_circ_000674	185.777	157.562	14	10	GeneID_100694326	NC_031966.1	+	16672896	16676295	454	annot_exons
novel_circ_000675	53.0793	78.7811	4	5	GeneID_100694326	NC_031966.1	+	16672899	16676295	451	annot_exons
novel_circ_000676	0	47.2687	0	3	GeneID_100690735	NC_031966.1	+	16703124	16703576	330	annot_exons
novel_circ_000678	0	47.2687	0	3	GeneID_100691804	NC_031966.1	-	16938445	16939964	290	annot_exons
novel_circ_000680	0	31.5124	0	2	GeneID_100702532	NC_031966.1	+	17232094	17261110	565	annot_exons
novel_circ_000681	26.5396	0	2	0	GeneID_100702532	NC_031966.1	+	17252009	17264116	547	annot_exons
novel_circ_000684	39.8094	15.7562	3	1	GeneID_100703066	NC_031966.1	+	17338485	17340794	691	annot_exons
novel_circ_000686	0	31.5124	0	2	GeneID_100703337	NC_031966.1	-	17366007	17366446	346	annot_exons
novel_circ_000691	0	31.5124	0	2	GeneID_100706013	NC_031966.1	-	17931450	17938605	2120	annot_exons
novel_circ_000692	39.8094	0	3	0	GeneID_100707080	NC_031966.1	+	18062985	18070847	375	annot_exons
novel_circ_000693	106.159	31.5124	8	2	GeneID_100708159	NC_031966.1	+	18210350	18215060	1022	annot_exons
novel_circ_000694	13.2698	31.5124	1	2	GeneID_100694681	NC_031966.1	+	18283754	18293323	350	annot_exons
novel_circ_000697	225.587	31.5124	17	2	GeneID_100706543	NC_031966.1	-	18477519	18479372	828	annot_exons
novel_circ_000698	106.159	63.0249	8	4	GeneID_100691532	NC_031966.1	-	18526294	18529060	211	annot_exons
novel_circ_000699	53.0793	0	4	0	GeneID_100691532	NC_031966.1	-	18534334	18548422	1909	annot_exons
novel_circ_000700	26.5396	15.7562	2	1	GeneID_100691532	NC_031966.1	-	18537041	18548422	1662	annot_exons
novel_circ_000702	39.8094	0	3	0	GeneID_100703609	NC_031966.1	+	18906117	18958654	623	annot_exons
novel_circ_000993	0	31.5124	0	2	GeneID_100701452	NC_031966.1	+	19153452	19154059	241	annot_exons
novel_circ_000994	26.5396	0	2	0	GeneID_100700364	NC_031966.1	-	19202760	19203391	293	annot_exons
novel_circ_000995	26.5396	0	2	0	GeneID_100700092	NC_031966.1	+	19214578	19216475	641	annot_exons
novel_circ_000996	159.238	94.5373	12	6	GeneID_100698749	NC_031966.1	+	19306717	19314763	1497	annot_exons
novel_circ_000998	796.189	1607.13	60	102	GeneID_100698216	NC_031966.1	-	19353207	19355018	429	annot_exons
novel_circ_001000	0	78.7811	0	5	GeneID_100709965	NC_031966.1	-	19426442	19439215	434	annot_exons
novel_circ_001001	26.5396	47.2687	2	3	GeneID_100709965	NC_031966.1	-	19426442	19460999	853	annot_exons
novel_circ_001002	398.094	126.05	30	8	GeneID_100709965	NC_031966.1	-	19437600	19439215	272	annot_exons
novel_circ_001003	0	31.5124	0	2	GeneID_100709965	NC_031966.1	-	19437600	19446192	529	annot_exons
novel_circ_001004	79.6189	94.5373	6	6	GeneID_100709965	NC_031966.1	-	19437600	19460999	691	annot_exons
novel_circ_001006	39.8094	63.0249	3	4	GeneID_100709965	NC_031966.1	-	19459078	19487000	1040	annot_exons
novel_circ_001007	0	31.5124	0	2	GeneID_100709965	NC_031966.1	-	19459078	19505539	1481	annot_exons
novel_circ_001009	0	63.0249	0	4	GeneID_100697944	NC_031966.1	+	19960274	19969423	3089	annot_exons
novel_circ_001010	26.5396	15.7562	2	1	GeneID_100697944	NC_031966.1	+	19960274	20036450	5493	annot_exons
novel_circ_001015	212.317	63.0249	16	4	GeneID_100697681	NC_031966.1	-	20185630	20187579	625	annot_exons
novel_circ_001016	0	31.5124	0	2	GeneID_100697681	NC_031966.1	-	20187367	20191484	715	annot_exons
novel_circ_001018	13.2698	47.2687	1	3	GeneID_100696615	NC_031966.1	-	20346971	20350792	1517	annot_exons
novel_circ_001019	53.0793	0	4	0	GeneID_100695298	NC_031966.1	-	20523778	20528571	840	annot_exons
novel_circ_001021	26.5396	15.7562	2	1	GeneID_100692345	NC_031966.1	-	20723589	20725561	357	annot_exons
novel_circ_001022	26.5396	31.5124	2	2	GeneID_100690280	NC_031966.1	+	20912685	20914465	820	annot_exons
novel_circ_001023	26.5396	0	2	0	GeneID_102077791	NC_031966.1	+	20986669	20990326	790	annot_exons
novel_circ_001024	26.5396	0	2	0	GeneID_100711292	NC_031966.1	+	21280764	21328241	1942	annot_exons
novel_circ_001040	26.5396	0	2	0	GeneID_100700276	NC_031966.1	+	22261871	22290115	496	annot_exons
novel_circ_001041	13.2698	31.5124	1	2	GeneID_100700276	NC_031966.1	+	22281809	22290115	369	annot_exons
novel_circ_001042	13.2698	47.2687	1	3	GeneID_100699740	NC_031966.1	+	22337531	22341136	778	annot_exons
novel_circ_001044	53.0793	0	4	0	GeneID_100699470	NC_031966.1	-	22377154	22382067	759	annot_exons
novel_circ_001046	26.5396	31.5124	2	2	GeneID_100698400	NC_031966.1	-	22504094	22505208	668	annot_exons
novel_circ_001047	0	31.5124	0	2	GeneID_100693470	NC_031966.1	+	23734008	23776696	381	annot_exons
novel_circ_001051	0	31.5124	0	2	GeneID_100692105	NC_031966.1	+	23968470	23969348	480	annot_exons
novel_circ_001052	66.3491	31.5124	5	2	GeneID_100710701	NC_031966.1	-	24633524	24634378	386	annot_exons
novel_circ_001053	26.5396	0	2	0	GeneID_100710701	NC_031966.1	-	24633524	24637254	677	annot_exons
novel_circ_001054	39.8094	47.2687	3	3	GeneID_100710701	NC_031966.1	-	24636749	24640828	374	annot_exons
novel_circ_001055	26.5396	31.5124	2	2	GeneID_100710173	NC_031966.1	-	24684908	24685331	324	annot_exons
novel_circ_001056	0	31.5124	0	2	GeneID_100710173	NC_031966.1	-	24686092	24686665	259	annot_exons
novel_circ_001057	26.5396	0	2	0	GeneID_100710173	NC_031966.1	-	24686092	24686927	446	annot_exons
novel_circ_001059	132.698	110.294	10	7	GeneID_102080697	NC_031966.1	+	24987006	24988296	828	annot_exons
novel_circ_001061	53.0793	0	4	0	GeneID_100692981	NC_031966.1	+	25135585	25136989	177	annot_exons
novel_circ_001063	26.5396	31.5124	2	2	GeneID_100692707	NC_031966.1	+	25199827	25209692	4338	annot_exons
novel_circ_001064	0	31.5124	0	2	GeneID_100697871	NC_031966.1	+	25646057	25647369	494	annot_exons
novel_circ_001065	79.6189	31.5124	6	2	GeneID_100697871	NC_031966.1	+	25646087	25647369	464	annot_exons
novel_circ_001067	79.6189	94.5373	6	6	GeneID_100696355	NC_031966.1	-	25750564	25760842	1553	annot_exons
novel_circ_001069	26.5396	0	2	0	GeneID_100696355	NC_031966.1	-	25760053	25832824	1126	annot_exons
novel_circ_001070	53.0793	78.7811	4	5	GeneID_100696355	NC_031966.1	-	25790976	25832824	336	annot_exons
novel_circ_001071	106.159	267.856	8	17	GeneID_100696355	NC_031966.1	-	25790976	25855569	1165	annot_exons
novel_circ_001073	119.428	157.562	9	10	GeneID_100696355	NC_031966.1	-	25832675	25855569	979	annot_exons
novel_circ_001074	13.2698	31.5124	1	2	GeneID_100695922	NC_031966.1	+	25992094	26015992	399	annot_exons
novel_circ_001075	291.936	94.5373	22	6	GeneID_100695922	NC_031966.1	+	25992094	26035613	587	annot_exons
novel_circ_001076	26.5396	78.7811	2	5	GeneID_100695922	NC_031966.1	+	25992094	26058372	1961	annot_exons
novel_circ_001077	66.3491	47.2687	5	3	GeneID_100695922	NC_031966.1	+	26015753	26035613	428	annot_exons
novel_circ_001078	26.5396	0	2	0	GeneID_100695922	NC_031966.1	+	26015753	26048469	482	annot_exons
novel_circ_001079	26.5396	31.5124	2	2	GeneID_100695922	NC_031966.1	+	26035426	26053214	782	annot_exons
novel_circ_001080	13.2698	47.2687	1	3	GeneID_100695922	NC_031966.1	+	26035426	26058372	1562	annot_exons
novel_circ_001083	0	78.7811	0	5	GeneID_100692980	NC_031966.1	+	26329761	26333499	740	annot_exons
novel_circ_001084	0	31.5124	0	2	GeneID_100710240	NC_031966.1	+	26636092	26639416	429	annot_exons
novel_circ_001085	0	94.5373	0	6	GeneID_100710240	NC_031966.1	+	26661300	26664426	491	annot_exons
novel_circ_001087	0	63.0249	0	4	GeneID_100691900	NC_031966.1	-	26733796	26734364	376	annot_exons
novel_circ_001091	0	31.5124	0	2	GeneID_100711469	NC_031966.1	+	27413145	27424259	703	annot_exons
novel_circ_001092	53.0793	31.5124	4	2	GeneID_100708080	NC_031966.1	+	27653377	27656066	377	annot_exons
novel_circ_001093	39.8094	31.5124	3	2	GeneID_100708080	NC_031966.1	+	27653377	27659018	720	annot_exons
novel_circ_001094	26.5396	47.2687	2	3	GeneID_100708080	NC_031966.1	+	27653377	27661031	890	annot_exons
novel_circ_001096	53.0793	0	4	0	GeneID_100707541	NC_031966.1	-	27673894	27675226	864	annot_exons
novel_circ_001097	26.5396	0	2	0	GeneID_100707541	NC_031966.1	-	27677385	27682126	1352	annot_exons
novel_circ_001098	0	31.5124	0	2	GeneID_100707016	NC_031966.1	-	27708251	27708684	311	annot_exons
novel_circ_001099	172.508	157.562	13	10	GeneID_100707015	NC_031966.1	-	27745948	27746451	267	annot_exons
novel_circ_001100	26.5396	31.5124	2	2	GeneID_100707015	NC_031966.1	-	27746254	27748237	378	annot_exons
novel_circ_001101	53.0793	31.5124	4	2	GeneID_100707015	NC_031966.1	-	27753984	27763403	347	annot_exons
novel_circ_001102	265.396	189.075	20	12	GeneID_100707015	NC_031966.1	-	27761108	27767975	482	annot_exons
novel_circ_001103	39.8094	31.5124	3	2	GeneID_100705943	NC_031966.1	+	27937319	27947632	740	annot_exons
novel_circ_001104	53.0793	0	4	0	GeneID_100706016	NC_031966.1	-	28034304	28034946	373	annot_exons
novel_circ_001105	0	31.5124	0	2	GeneID_100705590	NC_031966.1	+	28178508	28194236	1019	annot_exons
novel_circ_001106	13.2698	31.5124	1	2	GeneID_100705590	NC_031966.1	+	28183817	28194236	779	annot_exons
novel_circ_001107	0	31.5124	0	2	GeneID_100705590	NC_031966.1	+	28183817	28200757	1432	annot_exons
novel_circ_001108	0	94.5373	0	6	GeneID_100705590	NC_031966.1	+	28199435	28200757	653	annot_exons
novel_circ_001109	26.5396	31.5124	2	2	GeneID_100705590	NC_031966.1	+	28214423	28216164	447	annot_exons
novel_circ_001111	106.159	173.318	8	11	GeneID_100703886	NC_031966.1	+	28706337	28728975	648	annot_exons
novel_circ_001114	2547.8	2426.46	192	154	GeneID_100703886	NC_031966.1	+	28813652	28813857	204	annot_exons
novel_circ_001115	411.364	1071.42	31	68	GeneID_100703886	NC_031966.1	+	28813652	28821672	436	annot_exons
novel_circ_001116	796.189	819.323	60	52	GeneID_100703886	NC_031966.1	+	28813652	28833391	675	annot_exons
novel_circ_001117	159.238	157.562	12	10	GeneID_100703886	NC_031966.1	+	28821441	28833391	471	annot_exons
novel_circ_001118	26.5396	0	2	0	GeneID_100703886	NC_031966.1	+	28866756	28867304	257	annot_exons
novel_circ_001120	26.5396	0	2	0	GeneID_100703806	NC_031966.1	+	28939114	28940150	444	annot_exons
novel_circ_001121	53.0793	31.5124	4	2	GeneID_100703532	NC_031966.1	+	28987430	28987708	278	annot_exons
novel_circ_001122	2454.92	1796.21	185	114	GeneID_100702720	NC_031966.1	+	29262642	29266869	606	annot_exons
novel_circ_001123	39.8094	299.368	3	19	GeneID_100702720	NC_031966.1	+	29262642	29314292	1089	annot_exons
novel_circ_001124	13.2698	63.0249	1	4	GeneID_100702720	NC_031966.1	+	29262642	29332729	1263	annot_exons
novel_circ_001125	172.508	299.368	13	19	GeneID_100702720	NC_031966.1	+	29306836	29314292	483	annot_exons
novel_circ_001126	106.159	31.5124	8	2	GeneID_100702720	NC_031966.1	+	29306836	29332729	657	annot_exons
novel_circ_001127	79.6189	0	6	0	GeneID_100702720	NC_031966.1	+	29306836	29349544	1170	annot_exons
novel_circ_001128	26.5396	15.7562	2	1	GeneID_100702720	NC_031966.1	+	29354696	29367324	1467	annot_exons
novel_circ_001129	13.2698	47.2687	1	3	GeneID_100702720	NC_031966.1	+	29363092	29367324	903	annot_exons
novel_circ_001130	26.5396	0	2	0	GeneID_100702720	NC_031966.1	+	29363092	29387311	1533	annot_exons
novel_circ_001131	53.0793	0	4	0	GeneID_100702720	NC_031966.1	+	29364595	29367324	668	annot_exons
novel_circ_001132	26.5396	63.0249	2	4	GeneID_100702720	NC_031966.1	+	29376132	29387311	630	annot_exons
novel_circ_001133	0	31.5124	0	2	GeneID_100702720	NC_031966.1	+	29376989	29387311	486	annot_exons
novel_circ_001134	26.5396	31.5124	2	2	GeneID_100702720	NC_031966.1	+	29417993	29419484	511	annot_exons
novel_circ_001135	26.5396	31.5124	2	2	GeneID_102080056	NC_031966.1	-	29469842	29486645	1257	annot_exons
novel_circ_001136	39.8094	15.7562	3	1	GeneID_102080056	NC_031966.1	-	29483094	29486645	636	annot_exons
novel_circ_001137	92.8887	15.7562	7	1	GeneID_102080056	NC_031966.1	-	29483094	29492197	783	annot_exons
novel_circ_001138	159.238	204.831	12	13	GeneID_102080056	NC_031966.1	-	29486189	29486645	340	annot_exons
novel_circ_001139	79.6189	0	6	0	GeneID_102080056	NC_031966.1	-	29492051	29498571	396	annot_exons
novel_circ_001140	26.5396	47.2687	2	3	GeneID_102080056	NC_031966.1	-	29492051	29504789	729	annot_exons
novel_circ_001141	13.2698	47.2687	1	3	GeneID_102080056	NC_031966.1	-	29496144	29498571	249	annot_exons
novel_circ_001142	39.8094	0	3	0	GeneID_102080056	NC_031966.1	-	29503099	29504789	333	annot_exons
novel_circ_001146	26.5396	0	2	0	GeneID_100701314	NC_031966.1	+	29835038	29841407	2490	annot_exons
novel_circ_001148	26.5396	31.5124	2	2	GeneID_100712148	NC_031966.1	-	29910915	29913898	629	annot_exons
novel_circ_001149	66.3491	47.2687	5	3	GeneID_100712148	NC_031966.1	-	29913326	29916331	612	annot_exons
novel_circ_001150	26.5396	31.5124	2	2	GeneID_100712148	NC_031966.1	-	29915492	29916331	216	annot_exons
novel_circ_001152	53.0793	31.5124	4	2	GeneID_100696469	NC_031966.1	+	31078797	31087340	2207	annot_exons
novel_circ_001153	0	31.5124	0	2	GeneID_100697276	NC_031966.1	-	31123399	31130530	846	annot_exons
novel_circ_001154	0	63.0249	0	4	GeneID_100697276	NC_031966.1	-	31123399	31139566	1284	annot_exons
novel_circ_001155	39.8094	0	3	0	GeneID_100697276	NC_031966.1	-	31134160	31139566	438	annot_exons
novel_circ_001156	291.936	47.2687	22	3	GeneID_100698076	NC_031966.1	+	31293623	31297186	406	annot_exons
novel_circ_001157	0	31.5124	0	2	GeneID_100698076	NC_031966.1	+	31293623	31308096	465	annot_exons
novel_circ_001158	26.5396	0	2	0	GeneID_100698607	NC_031966.1	-	31408820	31421034	686	annot_exons
novel_circ_001159	0	31.5124	0	2	GeneID_100698607	NC_031966.1	-	31416123	31421034	474	annot_exons
novel_circ_001160	53.0793	0	4	0	GeneID_100698607	NC_031966.1	-	31440302	31444850	596	annot_exons
novel_circ_001162	39.8094	31.5124	3	2	GeneID_100698607	NC_031966.1	-	31467599	31482282	751	annot_exons
novel_circ_001163	477.713	283.612	36	18	GeneID_100698607	NC_031966.1	-	31475118	31482282	538	annot_exons
novel_circ_001165	0	31.5124	0	2	GeneID_100699144	NC_031966.1	-	31518423	31521977	556	annot_exons
novel_circ_001166	145.968	157.562	11	10	GeneID_100699144	NC_031966.1	-	31521072	31536031	804	annot_exons
novel_circ_001168	92.8887	0	7	0	GeneID_100701573	NC_031966.1	-	31845025	31857811	1989	annot_exons
novel_circ_001170	79.6189	15.7562	6	1	GeneID_100701573	NC_031966.1	-	31853044	31857811	796	annot_exons
novel_circ_001172	1711.81	2142.85	129	136	GeneID_100701573	NC_031966.1	-	31943335	31945692	1098	annot_exons
novel_circ_001173	212.317	204.831	16	13	GeneID_100701573	NC_031966.1	-	31943335	31953767	1337	annot_exons
novel_circ_001175	26.5396	0	2	0	GeneID_100703189	NC_031966.1	-	32149023	32151560	2054	annot_exons
novel_circ_001176	26.5396	0	2	0	GeneID_100703458	NC_031966.1	-	32246399	32249357	464	annot_exons
novel_circ_001177	225.587	63.0249	17	4	GeneID_100703458	NC_031966.1	-	32253365	32255746	315	annot_exons
novel_circ_001178	119.428	157.562	9	10	GeneID_100703458	NC_031966.1	-	32278481	32287360	279	annot_exons
novel_circ_001179	504.253	220.587	38	14	GeneID_100703458	NC_031966.1	-	32278481	32321631	354	annot_exons
novel_circ_001180	53.0793	157.562	4	10	GeneID_100703458	NC_031966.1	-	32385863	32386285	341	annot_exons
novel_circ_001181	53.0793	94.5373	4	6	GeneID_100703458	NC_031966.1	-	32385863	32417752	615	annot_exons
novel_circ_001183	0	31.5124	0	2	GeneID_100703734	NC_031966.1	-	32917303	32918400	390	annot_exons
novel_circ_001184	0	47.2687	0	3	GeneID_100709113	NC_031966.1	+	34972294	34976521	689	annot_exons
novel_circ_001185	26.5396	15.7562	2	1	GeneID_100709113	NC_031966.1	+	34974696	34976521	497	annot_exons
novel_circ_001186	26.5396	63.0249	2	4	GeneID_100709382	NC_031966.1	-	35114981	35124912	3192	annot_exons
novel_circ_001187	132.698	63.0249	10	4	GeneID_100709382	NC_031966.1	-	35122308	35124297	1224	annot_exons
novel_circ_001189	26.5396	0	2	0	GeneID_100696493	NC_031967.1	-	124866	125156	219	annot_exons
novel_circ_001193	26.5396	0	2	0	GeneID_100694908	NC_031967.1	-	256598	258358	243	annot_exons
novel_circ_001194	26.5396	0	2	0	GeneID_100694109	NC_031967.1	-	300969	301917	543	annot_exons
novel_circ_001196	119.428	126.05	9	8	GeneID_100691685	NC_031967.1	-	507453	513969	324	annot_exons
novel_circ_001197	26.5396	0	2	0	GeneID_102081397	NC_031967.1	-	525209	526955	1355	annot_exons
novel_circ_001198	0	31.5124	0	2	GeneID_102081308	NC_031967.1	-	543123	550771	227	annot_exons
novel_circ_001202	26.5396	63.0249	2	4	GeneID_100706765	NC_031967.1	+	2947292	2959949	1945	annot_exons
novel_circ_001203	0	31.5124	0	2	GeneID_100706765	NC_031967.1	+	2947292	2993319	2052	annot_exons
novel_circ_001204	0	63.0249	0	4	GeneID_100706765	NC_031967.1	+	2958055	3006044	1335	annot_exons
novel_circ_001208	0	31.5124	0	2	GeneID_100711594	NC_031967.1	+	3223908	3226671	322	annot_exons
novel_circ_001209	530.793	693.274	40	44	GeneID_100711594	NC_031967.1	+	3223908	3239965	904	annot_exons
novel_circ_001210	796.189	1181.72	60	75	GeneID_100711594	NC_031967.1	+	3223908	3275495	1023	annot_exons
novel_circ_001211	66.3491	267.856	5	17	GeneID_100711594	NC_031967.1	+	3223908	3306094	1186	annot_exons
novel_circ_001212	79.6189	31.5124	6	2	GeneID_100711594	NC_031967.1	+	3275377	3351598	465	annot_exons
novel_circ_001214	0	63.0249	0	4	GeneID_100711594	NC_031967.1	+	3436242	3437120	235	annot_exons
novel_circ_001215	172.508	94.5373	13	6	GeneID_100711594	NC_031967.1	+	3436242	3442389	457	annot_exons
novel_circ_001217	0	31.5124	0	2	GeneID_100703556	NC_031967.1	-	3615954	3620210	408	annot_exons
novel_circ_001218	39.8094	31.5124	3	2	GeneID_100703556	NC_031967.1	-	3631885	3633925	523	annot_exons
novel_circ_001219	39.8094	0	3	0	GeneID_100703556	NC_031967.1	-	3631885	3645574	724	annot_exons
novel_circ_001221	13.2698	63.0249	1	4	GeneID_100703287	NC_031967.1	-	3751125	3762964	908	annot_exons
novel_circ_001222	92.8887	110.294	7	7	GeneID_100703287	NC_031967.1	-	3757515	3762964	366	annot_exons
novel_circ_001223	26.5396	0	2	0	GeneID_100703287	NC_031967.1	-	3757515	3797129	898	annot_exons
novel_circ_001225	53.0793	0	4	0	GeneID_100702746	NC_031967.1	+	3849418	3860268	1317	annot_exons
novel_circ_001227	0	31.5124	0	2	GeneID_100691856	NC_031967.1	+	4295915	4307234	773	annot_exons
novel_circ_001229	53.0793	78.7811	4	5	GeneID_100711155	NC_031967.1	+	4558471	4559266	690	annot_exons
novel_circ_001230	0	31.5124	0	2	GeneID_100711155	NC_031967.1	+	4558471	4562232	820	annot_exons
novel_circ_001231	252.126	31.5124	19	2	GeneID_100711425	NC_031967.1	+	4579299	4581884	704	annot_exons
novel_circ_001233	26.5396	0	2	0	GeneID_100711967	NC_031967.1	+	5085969	5089274	851	annot_exons
novel_circ_001235	0	47.2687	0	3	GeneID_100689885	NC_031967.1	+	5275779	5276127	261	annot_exons
novel_circ_001236	0	31.5124	0	2	GeneID_100699721	NC_031967.1	+	5431567	5432740	500	annot_exons
novel_circ_001237	238.857	110.294	18	7	GeneID_100700255	NC_031967.1	-	5495168	5496203	941	annot_exons
novel_circ_001239	39.8094	63.0249	3	4	GeneID_100696152	NC_031967.1	-	5816234	5817635	324	annot_exons
novel_circ_001240	145.968	31.5124	11	2	GeneID_100696152	NC_031967.1	-	5816234	5820262	555	annot_exons
novel_circ_001241	39.8094	47.2687	3	3	GeneID_100696152	NC_031967.1	-	5817411	5820262	456	annot_exons
novel_circ_001242	39.8094	0	3	0	GeneID_100696152	NC_031967.1	-	5833052	5835696	231	annot_exons
novel_circ_001244	490.983	393.905	37	25	GeneID_100701963	NC_031967.1	+	7115110	7116591	624	annot_exons
novel_circ_001245	0	31.5124	0	2	GeneID_100698983	NC_031967.1	+	7185283	7186038	461	annot_exons
novel_circ_001246	0	31.5124	0	2	GeneID_100697913	NC_031967.1	-	7276137	7277491	1012	annot_exons
novel_circ_001247	0	63.0249	0	4	GeneID_100701145	NC_031967.1	-	7340757	7354495	1596	annot_exons
novel_circ_001248	106.159	47.2687	8	3	GeneID_100700327	NC_031967.1	-	7437869	7439983	370	annot_exons
novel_circ_001249	13.2698	63.0249	1	4	GeneID_100700327	NC_031967.1	-	7437869	7440785	551	annot_exons
novel_circ_001250	26.5396	0	2	0	GeneID_100696841	NC_031967.1	+	7588441	7589994	377	annot_exons
novel_circ_001251	13.2698	31.5124	1	2	GeneID_100706889	NC_031967.1	+	7776979	7781808	849	annot_exons
novel_circ_001253	26.5396	15.7562	2	1	GeneID_100706889	NC_031967.1	+	7782175	7784465	1085	annot_exons
novel_circ_001256	26.5396	0	2	0	GeneID_100693841	NC_031967.1	+	8473062	8473617	372	annot_exons
novel_circ_001257	26.5396	0	2	0	GeneID_100706334	NC_031967.1	-	8770559	8782076	1479	annot_exons
novel_circ_001258	53.0793	0	4	0	GeneID_100706334	NC_031967.1	-	8785932	8793553	277	annot_exons
novel_circ_001259	39.8094	78.7811	3	5	GeneID_100706334	NC_031967.1	-	8785932	8824375	916	annot_exons
novel_circ_001260	39.8094	0	3	0	GeneID_100706334	NC_031967.1	-	8785932	8842394	981	annot_exons
novel_circ_001261	79.6189	0	6	0	GeneID_100706334	NC_031967.1	-	8793184	8824375	808	annot_exons
novel_circ_001262	0	31.5124	0	2	GeneID_100706334	NC_031967.1	-	8803675	8842394	454	annot_exons
novel_circ_001263	106.159	31.5124	8	2	GeneID_100706334	NC_031967.1	-	8819494	8842394	274	annot_exons
novel_circ_001264	79.6189	0	6	0	GeneID_100706334	NC_031967.1	-	8819494	8860322	513	annot_exons
novel_circ_001266	39.8094	0	3	0	GeneID_109196021	NC_031967.1	-	9377275	9377796	363	annot_exons
novel_circ_001267	0	31.5124	0	2	GeneID_100707946	NC_031967.1	+	9446046	9452607	753	annot_exons
novel_circ_001268	26.5396	0	2	0	GeneID_100707946	NC_031967.1	+	9459024	9460196	900	annot_exons
novel_circ_001271	79.6189	31.5124	6	2	GeneID_100710016	NC_031967.1	-	9622354	9623279	212	annot_exons
novel_circ_001273	53.0793	141.806	4	9	GeneID_100710282	NC_031967.1	-	9686145	9698975	518	annot_exons
novel_circ_001274	199.047	173.318	15	11	GeneID_100710282	NC_031967.1	-	9687804	9698975	429	annot_exons
novel_circ_001275	13.2698	31.5124	1	2	GeneID_100710282	NC_031967.1	-	9692818	9698971	364	annot_exons
novel_circ_001276	132.698	78.7811	10	5	GeneID_100710282	NC_031967.1	-	9692818	9698975	368	annot_exons
novel_circ_001279	0	63.0249	0	4	GeneID_100710282	NC_031967.1	-	9705060	9717173	908	annot_exons
novel_circ_001280	79.6189	31.5124	6	2	GeneID_100710282	NC_031967.1	-	9716478	9717173	334	annot_exons
novel_circ_001281	26.5396	31.5124	2	2	GeneID_100711349	NC_031967.1	-	10019725	10028080	717	annot_exons
novel_circ_001282	132.698	78.7811	10	5	GeneID_100711441	NC_031967.1	-	10333379	10333858	318	annot_exons
novel_circ_001283	79.6189	31.5124	6	2	GeneID_100689899	NC_031967.1	+	10359531	10365954	357	annot_exons
novel_circ_001284	212.317	126.05	16	8	GeneID_100711712	NC_031967.1	-	10391865	10398111	925	annot_exons
novel_circ_001285	159.238	47.2687	12	3	GeneID_100711712	NC_031967.1	-	10395942	10398111	671	annot_exons
novel_circ_001286	26.5396	0	2	0	GeneID_100711712	NC_031967.1	-	10397712	10398111	318	annot_exons
novel_circ_001287	53.0793	94.5373	4	6	GeneID_100693270	NC_031967.1	-	11290257	11296366	452	annot_exons
novel_circ_001288	66.3491	283.612	5	18	GeneID_100693270	NC_031967.1	-	11359350	11435993	1073	annot_exons
novel_circ_001289	53.0793	78.7811	4	5	GeneID_100693270	NC_031967.1	-	11392803	11435993	923	annot_exons
novel_circ_001292	39.8094	173.318	3	11	GeneID_100692728	NC_031967.1	+	11731697	11734117	803	annot_exons
novel_circ_001294	132.698	0	10	0	GeneID_100693804	NC_031967.1	+	12942147	12942928	405	annot_exons
novel_circ_001295	26.5396	0	2	0	GeneID_100693804	NC_031967.1	+	12950008	12958229	834	annot_exons
novel_circ_001296	13.2698	47.2687	1	3	GeneID_100700573	NC_031967.1	+	13049443	13051293	842	annot_exons
novel_circ_001297	53.0793	0	4	0	GeneID_102077893	NC_031967.1	+	13086808	13090060	763	annot_exons
novel_circ_001299	0	63.0249	0	4	GeneID_100692458	NC_031967.1	+	13169711	13185809	1606	annot_exons
novel_circ_001300	0	63.0249	0	4	GeneID_100692458	NC_031967.1	+	13177577	13185809	855	annot_exons
novel_circ_001305	26.5396	0	2	0	GeneID_100698955	NC_031967.1	+	13666052	13755178	2529	annot_exons
novel_circ_001310	53.0793	0	4	0	GeneID_100698955	NC_031967.1	+	13690758	13733976	1909	annot_exons
novel_circ_001311	13.2698	31.5124	1	2	GeneID_100698955	NC_031967.1	+	13690758	13755178	2203	annot_exons
novel_circ_001316	39.8094	31.5124	3	2	GeneID_100698955	NC_031967.1	+	14015527	14021445	402	annot_exons
novel_circ_001317	0	31.5124	0	2	GeneID_100709447	NC_031968.1	-	546361	548309	1152	annot_exons
novel_circ_001320	0	31.5124	0	2	GeneID_100711851	NC_031968.1	+	724282	725623	221	annot_exons
novel_circ_001321	26.5396	31.5124	2	2	GeneID_100711851	NC_031968.1	+	725499	735237	542	annot_exons
novel_circ_001322	13.2698	63.0249	1	4	GeneID_100711851	NC_031968.1	+	725499	736136	1350	annot_exons
novel_circ_001323	0	47.2687	0	3	GeneID_100711851	NC_031968.1	+	725499	736151	1365	annot_exons
novel_circ_001324	26.5396	0	2	0	GeneID_100711851	NC_031968.1	+	732359	736136	1155	annot_exons
novel_circ_001325	26.5396	0	2	0	GeneID_100708909	NC_031968.1	-	746989	749438	379	annot_exons
novel_circ_001326	119.428	31.5124	9	2	GeneID_100708363	NC_031968.1	-	1012757	1018660	575	annot_exons
novel_circ_001327	39.8094	110.294	3	7	GeneID_100708363	NC_031968.1	-	1012757	1021691	673	annot_exons
novel_circ_001328	0	78.7811	0	5	GeneID_100708363	NC_031968.1	-	1015212	1018660	300	annot_exons
novel_circ_001329	53.0793	31.5124	4	2	GeneID_100708363	NC_031968.1	-	1018537	1025304	377	annot_exons
novel_circ_001330	0	78.7811	0	5	GeneID_100708363	NC_031968.1	-	1025192	1026064	125	annot_exons
novel_circ_001331	53.0793	63.0249	4	4	GeneID_100708363	NC_031968.1	-	1040053	1043072	1143	annot_exons
novel_circ_001332	13.2698	63.0249	1	4	GeneID_100708363	NC_031968.1	-	1040053	1047331	1266	annot_exons
novel_circ_001333	0	63.0249	0	4	GeneID_100708363	NC_031968.1	-	1040053	1101531	1959	annot_exons
novel_circ_001334	53.0793	0	4	0	GeneID_100708363	NC_031968.1	-	1051239	1070421	331	annot_exons
novel_circ_001335	106.159	94.5373	8	6	GeneID_100708363	NC_031968.1	-	1070280	1072597	291	annot_exons
novel_circ_001336	26.5396	126.05	2	8	GeneID_100708363	NC_031968.1	-	1070280	1101531	477	annot_exons
novel_circ_001339	26.5396	47.2687	2	3	GeneID_100708093	NC_031968.1	-	1587851	1588692	484	annot_exons
novel_circ_001340	212.317	220.587	16	14	GeneID_100692188	NC_031968.1	+	1704988	1733551	452	annot_exons
novel_circ_001341	0	31.5124	0	2	GeneID_100692188	NC_031968.1	+	1704988	1770115	562	annot_exons
novel_circ_001344	53.0793	0	4	0	GeneID_100692188	NC_031968.1	+	1805759	1809765	455	annot_exons
novel_circ_001345	79.6189	78.7811	6	5	GeneID_100692188	NC_031968.1	+	1826435	1838910	690	annot_exons
novel_circ_001346	305.206	378.149	23	24	GeneID_100692188	NC_031968.1	+	1834059	1838910	506	annot_exons
novel_circ_001347	26.5396	31.5124	2	2	GeneID_100692188	NC_031968.1	+	1834059	1864147	1096	annot_exons
novel_circ_001348	13.2698	63.0249	1	4	GeneID_100692188	NC_031968.1	+	1853627	1864147	590	annot_exons
novel_circ_001349	26.5396	78.7811	2	5	GeneID_100692188	NC_031968.1	+	1857051	1864147	380	annot_exons
novel_circ_001350	0	63.0249	0	4	GeneID_100692188	NC_031968.1	+	1874747	1878999	392	annot_exons
novel_circ_001352	145.968	204.831	11	13	GeneID_100691381	NC_031968.1	+	2348789	2350197	335	annot_exons
novel_circ_001353	53.0793	0	4	0	GeneID_100691381	NC_031968.1	+	2348789	2358963	593	annot_exons
novel_circ_001354	39.8094	0	3	0	GeneID_100691381	NC_031968.1	+	2348789	2363707	1027	annot_exons
novel_circ_001355	26.5396	31.5124	2	2	GeneID_100691381	NC_031968.1	+	2348789	2364328	1648	annot_exons
novel_circ_001357	0	47.2687	0	3	GeneID_100691381	NC_031968.1	+	2355802	2364328	1313	annot_exons
novel_circ_001358	0	31.5124	0	2	GeneID_100691381	NC_031968.1	+	2358810	2361626	419	annot_exons
novel_circ_001359	291.936	110.294	22	7	GeneID_100691381	NC_031968.1	+	2358810	2364328	1209	annot_exons
novel_circ_001360	26.5396	0	2	0	GeneID_100691113	NC_031968.1	-	2484865	2538375	436	annot_exons
novel_circ_001361	26.5396	47.2687	2	3	GeneID_100691113	NC_031968.1	-	2525084	2538375	279	annot_exons
novel_circ_001362	39.8094	15.7562	3	1	GeneID_100690306	NC_031968.1	+	2665657	2688778	581	annot_exons
novel_circ_001363	106.159	0	8	0	GeneID_100690306	NC_031968.1	+	2685056	2688778	284	annot_exons
novel_circ_001364	39.8094	0	3	0	GeneID_100712019	NC_031968.1	-	7208747	7210842	1106	annot_exons
novel_circ_001368	26.5396	0	2	0	GeneID_100712551	NC_031968.1	-	7431548	7435891	809	annot_exons
novel_circ_001369	39.8094	0	3	0	GeneID_100712551	NC_031968.1	-	7439937	7455255	679	annot_exons
novel_circ_001370	0	31.5124	0	2	GeneID_100712551	NC_031968.1	-	7443344	7454026	531	annot_exons
novel_circ_001371	26.5396	0	2	0	GeneID_100712551	NC_031968.1	-	7443344	7455255	619	annot_exons
novel_circ_001372	199.047	78.7811	15	5	GeneID_100712551	NC_031968.1	-	7452746	7455255	304	annot_exons
novel_circ_001373	26.5396	0	2	0	GeneID_100696988	NC_031968.1	+	7533987	7535810	382	annot_exons
novel_circ_001374	437.904	236.343	33	15	GeneID_100697257	NC_031968.1	+	7572446	7578157	912	annot_exons
novel_circ_001375	53.0793	78.7811	4	5	GeneID_100697257	NC_031968.1	+	7572446	7583453	1001	annot_exons
novel_circ_001385	0	47.2687	0	3	GeneID_100702634	NC_031968.1	-	9376209	9378037	433	annot_exons
novel_circ_001388	26.5396	0	2	0	GeneID_100698867	NC_031968.1	+	11179711	11190537	2217	annot_exons
novel_circ_001393	66.3491	78.7811	5	5	GeneID_100696997	NC_031968.1	-	12576132	12602516	422	annot_exons
novel_circ_001395	66.3491	0	5	0	GeneID_100696460	NC_031968.1	+	12793195	12795783	741	annot_exons
novel_circ_001397	26.5396	15.7562	2	1	GeneID_100695408	NC_031968.1	+	12978442	12981908	1691	annot_exons
novel_circ_001406	26.5396	0	2	0	GeneID_102077300	NC_031968.1	+	16754057	16756694	672	annot_exons
novel_circ_001410	39.8094	0	3	0	GeneID_100692579	NC_031968.1	-	26562002	26565981	858	annot_exons
novel_circ_001411	26.5396	0	2	0	GeneID_102079927	NC_031968.1	-	26852862	26858125	1104	annot_exons
novel_circ_001412	265.396	488.443	20	31	GeneID_100700794	NC_031968.1	+	27620964	27621937	467	annot_exons
novel_circ_001413	92.8887	110.294	7	7	GeneID_100700794	NC_031968.1	+	27620975	27621937	456	annot_exons
novel_circ_001414	0	31.5124	0	2	GeneID_100701063	NC_031968.1	+	27666522	27671670	1398	annot_exons
novel_circ_001415	557.332	693.274	42	44	GeneID_100701336	NC_031968.1	-	27711850	27719787	879	annot_exons
novel_circ_001416	557.332	409.662	42	26	GeneID_100701336	NC_031968.1	-	27711850	27720564	909	annot_exons
novel_circ_001419	26.5396	31.5124	2	2	GeneID_100703031	NC_031968.1	+	32787936	32808631	647	annot_exons
novel_circ_001420	0	31.5124	0	2	GeneID_100703031	NC_031968.1	+	32787936	32836210	1046	annot_exons
novel_circ_001421	66.3491	0	5	0	GeneID_100703031	NC_031968.1	+	32870293	32873432	907	annot_exons
novel_circ_001422	159.238	0	12	0	GeneID_100703031	NC_031968.1	+	32915264	32917377	447	annot_exons
novel_circ_001423	0	31.5124	0	2	GeneID_100703031	NC_031968.1	+	32915264	32932758	571	annot_exons
novel_circ_001426	26.5396	63.0249	2	4	GeneID_100709478	NC_031968.1	+	34033756	34036150	275	annot_exons
novel_circ_001427	0	31.5124	0	2	GeneID_100707861	NC_031968.1	+	34058404	34060169	729	annot_exons
novel_circ_001428	92.8887	0	7	0	GeneID_100707861	NC_031968.1	+	34063066	34063656	441	annot_exons
novel_circ_001429	26.5396	157.562	2	10	GeneID_100709750	NC_031968.1	+	34067318	34073137	612	annot_exons
novel_circ_001433	39.8094	0	3	0	GeneID_100710444	NC_031968.1	+	35829984	35830782	677	annot_exons
novel_circ_001434	26.5396	0	2	0	GeneID_100707136	NC_031968.1	-	36187764	36189533	540	annot_exons
novel_circ_001435	0	31.5124	0	2	GeneID_100707136	NC_031968.1	-	36235286	36248015	431	annot_exons
novel_circ_001436	0	31.5124	0	2	GeneID_100707136	NC_031968.1	-	36235286	36302418	849	annot_exons
novel_circ_001437	66.3491	0	5	0	GeneID_100708744	NC_031968.1	-	36643494	36648433	354	annot_exons
novel_circ_001438	39.8094	0	3	0	GeneID_100708744	NC_031968.1	-	36648219	36651895	377	annot_exons
novel_circ_001439	26.5396	15.7562	2	1	GeneID_100708744	NC_031968.1	-	36648219	36673694	948	annot_exons
novel_circ_001440	145.968	15.7562	11	1	GeneID_100708744	NC_031968.1	-	36651734	36673694	733	annot_exons
novel_circ_001441	132.698	141.806	10	9	GeneID_100708744	NC_031968.1	-	36660677	36673694	571	annot_exons
novel_circ_001442	172.508	126.05	13	8	GeneID_100708744	NC_031968.1	-	36671004	36673694	266	annot_exons
novel_circ_001443	26.5396	47.2687	2	3	GeneID_100707129	NC_031968.1	-	37022488	37028704	614	annot_exons
novel_circ_001445	26.5396	94.5373	2	6	GeneID_100707129	NC_031968.1	-	37056475	37081410	525	annot_exons
novel_circ_001446	13.2698	31.5124	1	2	GeneID_100707129	NC_031968.1	-	37056475	37095647	913	annot_exons
novel_circ_001447	0	94.5373	0	6	GeneID_100707129	NC_031968.1	-	37062469	37081410	453	annot_exons
novel_circ_001448	53.0793	47.2687	4	3	GeneID_100707129	NC_031968.1	-	37068197	37081410	378	annot_exons
novel_circ_001449	119.428	267.856	9	17	GeneID_100707129	NC_031968.1	-	37068197	37095647	766	annot_exons
novel_circ_001451	358.285	677.517	27	43	GeneID_100707129	NC_031968.1	-	37081294	37095647	505	annot_exons
novel_circ_001453	53.0793	0	4	0	GeneID_100706865	NC_031968.1	-	37406832	37409677	2651	annot_exons
novel_circ_001457	26.5396	31.5124	2	2	GeneID_100705106	NC_031968.1	+	38171368	38207178	508	annot_exons
novel_circ_001458	13.2698	63.0249	1	4	GeneID_100705106	NC_031968.1	+	38171368	38220096	646	annot_exons
novel_circ_001459	13.2698	126.05	1	8	GeneID_100705106	NC_031968.1	+	38171368	38236253	987	annot_exons
novel_circ_001460	0	31.5124	0	2	GeneID_100705106	NC_031968.1	+	38171368	38250818	1923	annot_exons
novel_circ_001461	53.0793	0	4	0	GeneID_100705106	NC_031968.1	+	38171368	38265510	2170	annot_exons
novel_circ_001462	145.968	236.343	11	15	GeneID_100705106	NC_031968.1	+	38206097	38207178	291	annot_exons
novel_circ_001463	79.6189	31.5124	6	2	GeneID_100705106	NC_031968.1	+	38206097	38220096	429	annot_exons
novel_circ_001464	39.8094	0	3	0	GeneID_100705106	NC_031968.1	+	38206097	38233699	630	annot_exons
novel_circ_001465	66.3491	31.5124	5	2	GeneID_100705106	NC_031968.1	+	38206097	38236253	770	annot_exons
novel_circ_001466	0	63.0249	0	4	GeneID_100705106	NC_031968.1	+	38206097	38250818	1706	annot_exons
novel_circ_001467	53.0793	78.7811	4	5	GeneID_100705106	NC_031968.1	+	38219959	38233699	339	annot_exons
novel_circ_001468	26.5396	0	2	0	GeneID_100705106	NC_031968.1	+	38219959	38236253	479	annot_exons
novel_circ_001469	66.3491	31.5124	5	2	GeneID_100705106	NC_031968.1	+	38219959	38250818	1415	annot_exons
novel_circ_001470	79.6189	126.05	6	8	GeneID_100705106	NC_031968.1	+	38233499	38236253	341	annot_exons
novel_circ_001471	26.5396	0	2	0	GeneID_100704567	NC_031968.1	-	38426797	38434072	1225	annot_exons
novel_circ_001472	79.6189	0	6	0	GeneID_100704567	NC_031968.1	-	38426999	38430515	513	annot_exons
novel_circ_001474	26.5396	63.0249	2	4	GeneID_100704567	NC_031968.1	-	38429399	38432772	627	annot_exons
novel_circ_001475	66.3491	63.0249	5	4	GeneID_100702140	NC_031968.1	+	38685122	38685577	260	annot_exons
novel_circ_001476	0	63.0249	0	4	GeneID_100701052	NC_031968.1	-	38738609	38739306	366	annot_exons
novel_circ_001480	26.5396	0	2	0	GeneID_102079915	NC_031968.1	+	42884650	42885017	186	annot_exons
novel_circ_001483	39.8094	0	3	0	GeneID_100695114	NC_031969.1	+	1373583	1374180	372	annot_exons
novel_circ_001484	53.0793	78.7811	4	5	GeneID_100695114	NC_031969.1	+	1375603	1377786	926	annot_exons
novel_circ_001485	2136.44	2095.58	161	133	GeneID_100695114	NC_031969.1	+	1375603	1378877	1044	annot_exons
novel_circ_001486	66.3491	15.7562	5	1	GeneID_100695114	NC_031969.1	+	1377217	1379605	609	annot_exons
novel_circ_001487	53.0793	0	4	0	GeneID_100703600	NC_031969.1	-	1391554	1393856	590	annot_exons
novel_circ_001489	26.5396	15.7562	2	1	GeneID_100703872	NC_031969.1	-	1435459	1450631	1460	annot_exons
novel_circ_001490	13.2698	47.2687	1	3	GeneID_100703872	NC_031969.1	-	1450044	1450631	262	annot_exons
novel_circ_001494	53.0793	141.806	4	9	GeneID_100712182	NC_031969.1	+	2410103	2410877	636	annot_exons
novel_circ_001502	92.8887	78.7811	7	5	GeneID_100691982	NC_031969.1	+	2942782	2943967	631	annot_exons
novel_circ_001503	305.206	252.1	23	16	GeneID_100692249	NC_031969.1	-	2973728	2976386	576	annot_exons
novel_circ_001504	0	330.881	0	21	GeneID_100692519	NC_031969.1	-	3019491	3028041	297	annot_exons
novel_circ_001505	26.5396	47.2687	2	3	GeneID_100693330	NC_031969.1	-	3151884	3152712	580	annot_exons
novel_circ_001509	79.6189	15.7562	6	1	GeneID_100700355	NC_031969.1	-	3226291	3227703	399	annot_exons
novel_circ_001510	66.3491	15.7562	5	1	GeneID_100700355	NC_031969.1	-	3228473	3232070	787	annot_exons
novel_circ_001516	53.0793	126.05	4	8	GeneID_100707588	NC_031969.1	+	3524068	3545529	2388	annot_exons
novel_circ_001517	185.777	0	14	0	GeneID_100707588	NC_031969.1	+	3526826	3529673	427	annot_exons
novel_circ_001518	0	31.5124	0	2	GeneID_100707588	NC_031969.1	+	3526826	3545529	1815	annot_exons
novel_circ_001519	26.5396	31.5124	2	2	GeneID_100707588	NC_031969.1	+	3547332	3564872	654	annot_exons
novel_circ_001520	66.3491	0	5	0	GeneID_100707588	NC_031969.1	+	3550572	3567557	505	annot_exons
novel_circ_001521	252.126	283.612	19	18	GeneID_100707588	NC_031969.1	+	3555950	3567557	382	annot_exons
novel_circ_001522	716.57	1134.45	54	72	GeneID_100707588	NC_031969.1	+	3555950	3569171	424	annot_exons
novel_circ_001523	26.5396	0	2	0	GeneID_100707588	NC_031969.1	+	3555950	3576537	2578	annot_exons
novel_circ_001527	66.3491	0	5	0	GeneID_100707588	NC_031969.1	+	3564744	3567557	235	annot_exons
novel_circ_001529	225.587	47.2687	17	3	GeneID_100703873	NC_031969.1	-	4134594	4140182	923	annot_exons
novel_circ_001530	53.0793	15.7562	4	1	GeneID_100704865	NC_031969.1	-	4239612	4241169	534	annot_exons
novel_circ_001531	0	31.5124	0	2	GeneID_100699998	NC_031969.1	+	4260257	4261178	278	annot_exons
novel_circ_001532	145.968	157.562	11	10	GeneID_100700268	NC_031969.1	-	4265743	4266613	246	annot_exons
novel_circ_001535	39.8094	15.7562	3	1	GeneID_100705403	NC_031969.1	-	4756238	4761939	679	annot_exons
novel_circ_001536	0	31.5124	0	2	GeneID_100705403	NC_031969.1	-	4759320	4761939	449	annot_exons
novel_circ_001537	39.8094	47.2687	3	3	GeneID_100705403	NC_031969.1	-	4771779	4784669	929	annot_exons
novel_circ_001538	0	31.5124	0	2	GeneID_100705403	NC_031969.1	-	4778679	4798476	1165	annot_exons
novel_circ_001540	39.8094	0	3	0	GeneID_100705403	NC_031969.1	-	4784068	4798476	1050	annot_exons
novel_circ_001541	106.159	63.0249	8	4	GeneID_100705667	NC_031969.1	-	4853949	4865347	426	annot_exons
novel_circ_001542	172.508	126.05	13	8	GeneID_100705667	NC_031969.1	-	4853949	4866155	519	annot_exons
novel_circ_001543	0	31.5124	0	2	GeneID_100705667	NC_031969.1	-	4865154	4876711	406	annot_exons
novel_circ_001544	26.5396	31.5124	2	2	GeneID_100705667	NC_031969.1	-	4876568	4887327	447	annot_exons
novel_circ_001545	26.5396	0	2	0	GeneID_100705667	NC_031969.1	-	4973224	5042147	204	annot_exons
novel_circ_001550	265.396	126.05	20	8	GeneID_100706459	NC_031969.1	+	5960636	5964830	154	annot_exons
novel_circ_001555	66.3491	78.7811	5	5	GeneID_100707526	NC_031969.1	+	6037620	6044610	843	annot_exons
novel_circ_001556	26.5396	0	2	0	GeneID_100709498	NC_031969.1	-	6076036	6080848	431	annot_exons
novel_circ_001557	26.5396	31.5124	2	2	GeneID_100711823	NC_031969.1	-	6846704	6850136	662	annot_exons
novel_circ_001558	0	47.2687	0	3	GeneID_100712450	NC_031969.1	-	6887950	6893684	1044	annot_exons
novel_circ_001559	26.5396	0	2	0	GeneID_100712450	NC_031969.1	-	6905033	6907828	624	annot_exons
novel_circ_001560	0	157.562	0	10	GeneID_100689736	NC_031969.1	+	6994174	6995276	1010	annot_exons
novel_circ_001565	26.5396	47.2687	2	3	GeneID_100690271	NC_031969.1	-	7137871	7150500	4358	annot_exons
novel_circ_001567	424.634	456.93	32	29	GeneID_100690271	NC_031969.1	-	7149964	7150500	535	annot_exons
novel_circ_001569	0	31.5124	0	2	GeneID_100690539	NC_031969.1	-	7201276	7224276	1252	annot_exons
novel_circ_001570	13.2698	63.0249	1	4	GeneID_100690813	NC_031969.1	-	7243671	7248593	642	annot_exons
novel_circ_001571	0	31.5124	0	2	GeneID_100690813	NC_031969.1	-	7245906	7258596	644	annot_exons
novel_circ_001572	39.8094	0	3	0	GeneID_100690813	NC_031969.1	-	7258420	7261851	676	annot_exons
novel_circ_001573	79.6189	157.562	6	10	GeneID_100690813	NC_031969.1	-	7258420	7270758	1394	annot_exons
novel_circ_001574	0	31.5124	0	2	GeneID_100690813	NC_031969.1	-	7261456	7270758	1114	annot_exons
novel_circ_001575	106.159	126.05	8	8	GeneID_100690813	NC_031969.1	-	7268039	7270758	718	annot_exons
novel_circ_001576	26.5396	0	2	0	GeneID_100691076	NC_031969.1	-	7307320	7307770	272	annot_exons
novel_circ_001577	822.729	835.08	62	53	GeneID_100691344	NC_031969.1	-	7336385	7362907	4474	annot_exons
novel_circ_001579	39.8094	0	3	0	GeneID_100691344	NC_031969.1	-	7360364	7409023	2217	annot_exons
novel_circ_001580	39.8094	0	3	0	GeneID_100691344	NC_031969.1	-	7383694	7409023	940	annot_exons
novel_circ_001582	92.8887	78.7811	7	5	GeneID_100693236	NC_031969.1	-	7619890	7621485	371	annot_exons
novel_circ_001585	53.0793	15.7562	4	1	GeneID_100702614	NC_031969.1	-	7877475	7880316	1019	annot_exons
novel_circ_001588	0	31.5124	0	2	GeneID_100703962	NC_031969.1	+	7995187	7996056	272	annot_exons
novel_circ_001589	66.3491	0	5	0	GeneID_100705308	NC_031969.1	+	8076851	8122629	950	annot_exons
novel_circ_001590	26.5396	0	2	0	GeneID_100705308	NC_031969.1	+	8105056	8108752	326	annot_exons
novel_circ_001591	119.428	47.2687	9	3	GeneID_100705308	NC_031969.1	+	8105056	8122629	606	annot_exons
novel_circ_001592	66.3491	283.612	5	18	GeneID_100705308	NC_031969.1	+	8105056	8139529	784	annot_exons
novel_circ_001593	26.5396	0	2	0	GeneID_100705308	NC_031969.1	+	8108631	8152511	902	annot_exons
novel_circ_001594	66.3491	15.7562	5	1	GeneID_100705308	NC_031969.1	+	8122502	8139529	306	annot_exons
novel_circ_001599	26.5396	47.2687	2	3	GeneID_100707165	NC_031969.1	+	8803672	8817489	582	annot_exons
novel_circ_001600	0	31.5124	0	2	GeneID_100693772	NC_031969.1	-	8851350	8852270	63	annot_exons
novel_circ_001602	79.6189	63.0249	6	4	GeneID_100695909	NC_031969.1	-	9159719	9161313	1594	annot_exons
novel_circ_001603	39.8094	0	3	0	GeneID_100708961	NC_031969.1	-	9273755	9281110	693	annot_exons
novel_circ_001609	0	47.2687	0	3	GeneID_100700722	NC_031969.1	+	9921952	9925074	509	annot_exons
novel_circ_001610	53.0793	31.5124	4	2	GeneID_100700722	NC_031969.1	+	9921952	9926670	600	annot_exons
novel_circ_001612	0	31.5124	0	2	GeneID_100702344	NC_031969.1	-	10033930	10047510	474	annot_exons
novel_circ_001613	0	31.5124	0	2	GeneID_100702344	NC_031969.1	-	10040677	10107032	1013	annot_exons
novel_circ_001614	318.476	315.124	24	20	GeneID_100703696	NC_031969.1	-	10253789	10262941	2691	annot_exons
novel_circ_001615	0	31.5124	0	2	GeneID_102081467	NC_031969.1	+	10768696	10770075	802	annot_exons
novel_circ_001616	53.0793	31.5124	4	2	GeneID_100706634	NC_031969.1	-	10848462	10862551	585	annot_exons
novel_circ_001621	26.5396	63.0249	2	4	GeneID_100697931	NC_031969.1	-	11578885	11587087	1314	annot_exons
novel_circ_001623	185.777	362.393	14	23	GeneID_100697931	NC_031969.1	-	11583270	11587087	376	annot_exons
novel_circ_001624	13.2698	31.5124	1	2	GeneID_100697931	NC_031969.1	-	11586235	11593243	1210	annot_exons
novel_circ_001626	0	63.0249	0	4	GeneID_100710654	NC_031969.1	+	11632182	11633802	1030	annot_exons
novel_circ_001627	13.2698	94.5373	1	6	GeneID_100710654	NC_031969.1	+	11634933	11636279	563	annot_exons
novel_circ_001633	39.8094	0	3	0	GeneID_100704059	NC_031969.1	-	12418177	12418704	354	annot_exons
novel_circ_001634	39.8094	47.2687	3	3	GeneID_100705043	NC_031969.1	+	12519731	12520146	324	annot_exons
novel_circ_001635	53.0793	31.5124	4	2	GeneID_100705043	NC_031969.1	+	12519734	12520146	321	annot_exons
novel_circ_001638	0	63.0249	0	4	GeneID_100691791	NC_031969.1	-	12546418	12547617	622	annot_exons
novel_circ_001639	53.0793	15.7562	4	1	GeneID_100691791	NC_031969.1	-	12552491	12555115	457	annot_exons
novel_circ_001641	13.2698	299.368	1	19	GeneID_100692872	NC_031969.1	-	12676085	12690476	4124	annot_exons
novel_circ_001642	53.0793	78.7811	4	5	GeneID_100692872	NC_031969.1	-	12682120	12688177	1341	annot_exons
novel_circ_001643	278.666	346.637	21	22	GeneID_100692872	NC_031969.1	-	12682120	12690476	2178	annot_exons
novel_circ_001644	0	63.0249	0	4	GeneID_100696073	NC_031969.1	+	13175795	13178039	813	annot_exons
novel_circ_001645	26.5396	0	2	0	GeneID_100696073	NC_031969.1	+	13175795	13179632	927	annot_exons
novel_circ_001646	464.444	315.124	35	20	GeneID_100696868	NC_031969.1	-	13213378	13214253	463	annot_exons
novel_circ_001647	0	63.0249	0	4	GeneID_100708605	NC_031969.1	+	13479979	13482271	656	annot_exons
novel_circ_001648	0	47.2687	0	3	GeneID_100698301	NC_031969.1	+	13737300	13752905	503	annot_exons
novel_circ_001650	39.8094	47.2687	3	3	GeneID_100698301	NC_031969.1	+	13767284	13775037	1095	annot_exons
novel_circ_001651	39.8094	31.5124	3	2	GeneID_100698301	NC_031969.1	+	13777417	13781758	912	annot_exons
novel_circ_001654	13.2698	31.5124	1	2	GeneID_100697078	NC_031969.1	-	14614860	14627981	3002	annot_exons
novel_circ_001655	0	31.5124	0	2	GeneID_100697078	NC_031969.1	-	14636180	14642443	552	annot_exons
novel_circ_001656	0	47.2687	0	3	GeneID_100697078	NC_031969.1	-	14640215	14642443	418	annot_exons
novel_circ_001657	26.5396	0	2	0	GeneID_102083069	NC_031969.1	+	15414402	15440574	507	annot_exons
novel_circ_001658	26.5396	0	2	0	GeneID_100709526	NC_031969.1	-	15613001	15618043	683	annot_exons
novel_circ_001661	0	47.2687	0	3	GeneID_100698953	NC_031969.1	-	16098721	16107298	1065	annot_exons
novel_circ_001662	39.8094	47.2687	3	3	GeneID_100698953	NC_031969.1	-	16101442	16105818	646	annot_exons
novel_circ_001665	0	78.7811	0	5	GeneID_100702021	NC_031969.1	+	16763703	16779984	828	annot_exons
novel_circ_001666	0	78.7811	0	5	GeneID_100702021	NC_031969.1	+	16799973	16814051	451	annot_exons
novel_circ_001667	0	31.5124	0	2	GeneID_100702021	NC_031969.1	+	16804364	16807228	206	annot_exons
novel_circ_001669	66.3491	47.2687	5	3	GeneID_100697528	NC_031969.1	+	17459684	17464660	852	annot_exons
novel_circ_001670	0	63.0249	0	4	GeneID_100697528	NC_031969.1	+	17462558	17463723	310	annot_exons
novel_circ_001671	0	63.0249	0	4	GeneID_100710251	NC_031969.1	-	17603363	17604227	247	annot_exons
novel_circ_001672	13.2698	31.5124	1	2	GeneID_100710251	NC_031969.1	-	17606163	17608089	243	annot_exons
novel_circ_001673	66.3491	141.806	5	9	GeneID_100695935	NC_031969.1	+	18111412	18113797	493	annot_exons
novel_circ_001674	13.2698	47.2687	1	3	GeneID_100695935	NC_031969.1	+	18111412	18117726	754	annot_exons
novel_circ_001675	53.0793	110.294	4	7	GeneID_100695667	NC_031969.1	-	18189071	18189828	382	annot_exons
novel_circ_001678	92.8887	31.5124	7	2	GeneID_100694611	NC_031969.1	+	18439313	18451345	316	annot_exons
novel_circ_001679	0	31.5124	0	2	GeneID_100705263	NC_031969.1	-	19193007	19193473	193	annot_exons
novel_circ_001686	0	47.2687	0	3	GeneID_100710878	NC_031969.1	-	19486653	19500504	798	annot_exons
novel_circ_001688	26.5396	0	2	0	GeneID_100711144	NC_031969.1	-	19614144	19644450	2227	annot_exons
novel_circ_001689	119.428	47.2687	9	3	GeneID_100711144	NC_031969.1	-	19629370	19644450	1087	annot_exons
novel_circ_001690	53.0793	0	4	0	GeneID_100711144	NC_031969.1	-	19629370	19653225	1554	annot_exons
novel_circ_001691	53.0793	47.2687	4	3	GeneID_100711144	NC_031969.1	-	19636563	19644450	741	annot_exons
novel_circ_001692	39.8094	78.7811	3	5	GeneID_100711144	NC_031969.1	-	19642618	19644450	511	annot_exons
novel_circ_001693	26.5396	31.5124	2	2	GeneID_100711144	NC_031969.1	-	19649331	19653225	467	annot_exons
novel_circ_001694	53.0793	0	4	0	GeneID_100711414	NC_031969.1	-	19699281	19707870	587	annot_exons
novel_circ_001695	66.3491	94.5373	5	6	GeneID_100694261	NC_031969.1	-	21126749	21128589	390	annot_exons
novel_circ_001696	0	47.2687	0	3	GeneID_100694261	NC_031969.1	-	21126749	21128613	414	annot_exons
novel_circ_001697	119.428	157.562	9	10	GeneID_100694261	NC_031969.1	-	21126749	21133451	729	annot_exons
novel_circ_001699	66.3491	0	5	0	GeneID_100694261	NC_031969.1	-	21146129	21147766	880	annot_exons
novel_circ_001700	13.2698	47.2687	1	3	GeneID_100694261	NC_031969.1	-	21165106	21166607	349	annot_exons
novel_circ_001701	53.0793	15.7562	4	1	GeneID_100695056	NC_031969.1	+	21276996	21321312	3249	annot_exons
novel_circ_001703	265.396	1055.67	20	67	GeneID_100695056	NC_031969.1	+	21317215	21321312	3091	annot_exons
novel_circ_001704	26.5396	0	2	0	GeneID_100696380	NC_031969.1	+	21509626	21551890	377	annot_exons
novel_circ_001705	39.8094	0	3	0	GeneID_100696380	NC_031969.1	+	21509626	21569415	609	annot_exons
novel_circ_001706	26.5396	0	2	0	GeneID_100696380	NC_031969.1	+	21509626	21577249	769	annot_exons
novel_circ_001707	92.8887	31.5124	7	2	GeneID_100696380	NC_031969.1	+	21561736	21577249	392	annot_exons
novel_circ_001708	39.8094	0	3	0	GeneID_100696380	NC_031969.1	+	21561736	21587317	834	annot_exons
novel_circ_001709	39.8094	0	3	0	GeneID_100696380	NC_031969.1	+	21561736	21592985	1548	annot_exons
novel_circ_001711	119.428	15.7562	9	1	GeneID_100696380	NC_031969.1	+	21577090	21592985	1316	annot_exons
novel_circ_001713	132.698	141.806	10	9	GeneID_100696380	NC_031969.1	+	21591943	21592985	714	annot_exons
novel_circ_001715	79.6189	31.5124	6	2	GeneID_100697444	NC_031969.1	-	21816763	21821464	590	annot_exons
novel_circ_001716	26.5396	0	2	0	GeneID_100697444	NC_031969.1	-	21819529	21821464	437	annot_exons
novel_circ_001717	53.0793	15.7562	4	1	GeneID_100701209	NC_031969.1	+	22180296	22182523	464	annot_exons
novel_circ_001719	398.094	614.493	30	39	GeneID_100701757	NC_031969.1	-	22364587	22375162	930	annot_exons
novel_circ_001720	119.428	110.294	9	7	GeneID_100691023	NC_031969.1	+	22552690	22553835	464	annot_exons
novel_circ_001721	26.5396	0	2	0	GeneID_100691023	NC_031969.1	+	22552690	22555601	1045	annot_exons
novel_circ_001722	26.5396	0	2	0	GeneID_100703098	NC_031969.1	-	22560147	22563712	1401	annot_exons
novel_circ_001723	225.587	47.2687	17	3	GeneID_100703643	NC_031969.1	-	22587379	22599731	414	annot_exons
novel_circ_001724	0	31.5124	0	2	GeneID_100704449	NC_031969.1	-	22691252	22694107	452	annot_exons
novel_circ_001725	53.0793	47.2687	4	3	GeneID_100704987	NC_031969.1	+	22779464	22782056	569	annot_exons
novel_circ_001729	809.459	1323.52	61	84	GeneID_100693737	NC_031969.1	+	23609940	23611476	587	annot_exons
novel_circ_001731	26.5396	63.0249	2	4	GeneID_100691844	NC_031969.1	-	23722230	23729765	1129	annot_exons
novel_circ_001732	0	31.5124	0	2	GeneID_100691844	NC_031969.1	-	23723025	23729765	980	annot_exons
novel_circ_001733	53.0793	0	4	0	GeneID_100691844	NC_031969.1	-	23729144	23732470	685	annot_exons
novel_circ_001734	0	63.0249	0	4	GeneID_100691305	NC_031969.1	-	23798052	23802315	424	annot_exons
novel_circ_001735	66.3491	0	5	0	GeneID_100691039	NC_031969.1	-	23816128	23825905	3415	annot_exons
novel_circ_001736	0	78.7811	0	5	GeneID_100691039	NC_031969.1	-	23821821	23825905	2306	annot_exons
novel_circ_001737	26.5396	0	2	0	GeneID_100698792	NC_031969.1	-	23889584	23896170	1590	annot_exons
novel_circ_001738	106.159	15.7562	8	1	GeneID_100690773	NC_031969.1	-	23998460	23999116	219	annot_exons
novel_circ_001739	26.5396	0	2	0	GeneID_100690773	NC_031969.1	-	24003224	24024378	725	annot_exons
novel_circ_001742	0	47.2687	0	3	GeneID_100698523	NC_031969.1	+	24106494	24122588	533	annot_exons
novel_circ_001743	53.0793	47.2687	4	3	GeneID_100698523	NC_031969.1	+	24122165	24124908	386	annot_exons
novel_circ_001744	26.5396	0	2	0	GeneID_100690499	NC_031969.1	-	24177832	24183901	451	annot_exons
novel_circ_001745	53.0793	0	4	0	GeneID_100690499	NC_031969.1	-	24182017	24183901	374	annot_exons
novel_circ_001747	0	31.5124	0	2	GeneID_100710707	NC_031969.1	-	24515896	24519194	869	annot_exons
novel_circ_001748	79.6189	31.5124	6	2	GeneID_100710707	NC_031969.1	-	24517495	24520585	725	annot_exons
novel_circ_001749	0	78.7811	0	5	GeneID_100534510	NC_031969.1	-	24830446	24846411	644	annot_exons
novel_circ_001750	53.0793	0	4	0	GeneID_100534510	NC_031969.1	-	24837137	24846411	318	annot_exons
novel_circ_001752	53.0793	0	4	0	GeneID_100689874	NC_031969.1	-	25002317	25004376	284	annot_exons
novel_circ_001753	39.8094	0	3	0	GeneID_100689874	NC_031969.1	-	25003985	25009262	681	annot_exons
novel_circ_001754	0	31.5124	0	2	GeneID_100689874	NC_031969.1	-	25031699	25033830	772	annot_exons
novel_circ_001755	0	31.5124	0	2	GeneID_100689874	NC_031969.1	-	25031699	25040122	1166	annot_exons
novel_circ_001756	26.5396	0	2	0	GeneID_100689874	NC_031969.1	-	25039822	25043747	452	annot_exons
novel_circ_001758	106.159	126.05	8	8	GeneID_100690137	NC_031969.1	-	25191500	25193247	918	annot_exons
novel_circ_001759	26.5396	0	2	0	GeneID_100700674	NC_031969.1	+	25422710	25423775	218	annot_exons
novel_circ_001760	26.5396	0	2	0	GeneID_100708112	NC_031969.1	+	25517487	25525957	823	annot_exons
novel_circ_001761	26.5396	0	2	0	GeneID_100700129	NC_031969.1	+	25568131	25568694	282	annot_exons
novel_circ_001763	0	31.5124	0	2	GeneID_100697722	NC_031969.1	+	26002633	26007262	737	annot_exons
novel_circ_001766	26.5396	0	2	0	GeneID_100696297	NC_031969.1	-	26070657	26091663	3523	annot_exons
novel_circ_001767	26.5396	0	2	0	GeneID_100696297	NC_031969.1	-	26071741	26078405	1837	annot_exons
novel_circ_001768	26.5396	0	2	0	GeneID_100696297	NC_031969.1	-	26074156	26083999	1787	annot_exons
novel_circ_001769	0	126.05	0	8	GeneID_100696297	NC_031969.1	-	26090035	26091663	596	annot_exons
novel_circ_001770	0	31.5124	0	2	GeneID_100696297	NC_031969.1	-	26090035	26094891	712	annot_exons
novel_circ_001772	26.5396	31.5124	2	2	GeneID_100702213	NC_031969.1	-	26344486	26345668	269	annot_exons
novel_circ_001773	26.5396	31.5124	2	2	GeneID_100707659	NC_031969.1	-	26910938	26924103	488	annot_exons
novel_circ_001778	53.0793	0	4	0	GeneID_100694586	NC_031969.1	-	28029535	28038771	818	annot_exons
novel_circ_001779	26.5396	0	2	0	GeneID_100694586	NC_031969.1	-	28029535	28069192	1787	annot_exons
novel_circ_001780	53.0793	0	4	0	GeneID_100694586	NC_031969.1	-	28037139	28043673	859	annot_exons
novel_circ_001781	26.5396	0	2	0	GeneID_100694586	NC_031969.1	-	28037139	28057893	1355	annot_exons
novel_circ_001782	0	31.5124	0	2	GeneID_100694586	NC_031969.1	-	28049685	28050484	381	annot_exons
novel_circ_001783	79.6189	63.0249	6	4	GeneID_100694586	NC_031969.1	-	28049685	28057893	496	annot_exons
novel_circ_001784	0	31.5124	0	2	GeneID_100694586	NC_031969.1	-	28057779	28077802	723	annot_exons
novel_circ_001785	26.5396	110.294	2	7	GeneID_100694586	NC_031969.1	-	28057779	28145526	1609	annot_exons
novel_circ_001786	92.8887	173.318	7	11	GeneID_100694586	NC_031969.1	-	28069000	28077802	608	annot_exons
novel_circ_001787	119.428	126.05	9	8	GeneID_100694586	NC_031969.1	-	28069000	28145526	1494	annot_exons
novel_circ_001788	225.587	110.294	17	7	GeneID_100694586	NC_031969.1	-	28076555	28077802	415	annot_exons
novel_circ_001789	0	78.7811	0	5	GeneID_100694586	NC_031969.1	-	28076555	28115952	1054	annot_exons
novel_circ_001790	238.857	204.831	18	13	GeneID_100694586	NC_031969.1	-	28076555	28145526	1301	annot_exons
novel_circ_001793	570.602	787.811	43	50	GeneID_100694586	NC_031969.1	-	28115314	28145526	886	annot_exons
novel_circ_001794	66.3491	0	5	0	GeneID_100694586	NC_031969.1	-	28143991	28145526	247	annot_exons
novel_circ_001795	0	63.0249	0	4	GeneID_100694586	NC_031969.1	-	28143991	28149489	672	annot_exons
novel_circ_001796	39.8094	0	3	0	GeneID_100697505	NC_031969.1	-	28462179	28466001	3390	annot_exons
novel_circ_001797	53.0793	0	4	0	GeneID_100700725	NC_031969.1	-	28897535	28899791	284	annot_exons
novel_circ_001798	39.8094	0	3	0	GeneID_100700725	NC_031969.1	-	28898112	28900988	335	annot_exons
novel_circ_001799	66.3491	63.0249	5	4	GeneID_100700725	NC_031969.1	-	28900900	28902210	329	annot_exons
novel_circ_001800	26.5396	0	2	0	GeneID_100700725	NC_031969.1	-	28904056	28907887	1666	annot_exons
novel_circ_001801	53.0793	0	4	0	GeneID_100700725	NC_031969.1	-	28904056	28909680	2258	annot_exons
novel_circ_001803	132.698	47.2687	10	3	GeneID_100692969	NC_031969.1	+	29161151	29163273	293	annot_exons
novel_circ_001805	0	47.2687	0	3	GeneID_100690099	NC_031969.1	+	29307600	29309441	463	annot_exons
novel_circ_001806	0	63.0249	0	4	GeneID_100691078	NC_031969.1	-	29365619	29376777	897	annot_exons
novel_circ_001807	26.5396	0	2	0	GeneID_100690273	NC_031969.1	-	29533097	29552451	649	annot_exons
novel_circ_001808	0	31.5124	0	2	GeneID_100690273	NC_031969.1	-	29533097	29590805	900	annot_exons
novel_circ_001809	66.3491	31.5124	5	2	GeneID_100690273	NC_031969.1	-	29543669	29552451	374	annot_exons
novel_circ_001810	26.5396	0	2	0	GeneID_100690273	NC_031969.1	-	29543669	29562010	478	annot_exons
novel_circ_001812	39.8094	63.0249	3	4	GeneID_100710752	NC_031969.1	-	29933943	29938213	558	annot_exons
novel_circ_001813	26.5396	0	2	0	GeneID_100710752	NC_031969.1	-	29937810	29952538	1280	annot_exons
novel_circ_001814	0	63.0249	0	4	GeneID_100710752	NC_031969.1	-	29943915	29945089	237	annot_exons
novel_circ_001815	53.0793	31.5124	4	2	GeneID_100710752	NC_031969.1	-	29950734	29952538	171	annot_exons
novel_circ_001816	39.8094	0	3	0	GeneID_100710484	NC_031969.1	+	30087704	30088372	215	annot_exons
novel_circ_001822	53.0793	31.5124	4	2	GeneID_102075784	NC_031969.1	-	30310163	30315358	3512	annot_exons
novel_circ_001823	0	47.2687	0	3	GeneID_102075784	NC_031969.1	-	30325513	30326716	828	annot_exons
novel_circ_001824	0	63.0249	0	4	GeneID_100708337	NC_031969.1	+	30383789	30390137	2762	annot_exons
novel_circ_001825	0	31.5124	0	2	GeneID_100708337	NC_031969.1	+	30389988	30406007	6503	annot_exons
novel_circ_001826	0	63.0249	0	4	GeneID_100704678	NC_031969.1	-	30512541	30512875	204	annot_exons
novel_circ_001827	79.6189	0	6	0	GeneID_100704145	NC_031969.1	+	30743111	30745212	372	annot_exons
novel_circ_001830	0	47.2687	0	3	GeneID_100701915	NC_031969.1	+	31082702	31092625	834	annot_exons
novel_circ_001833	132.698	63.0249	10	4	GeneID_100701915	NC_031969.1	+	31122997	31196272	1036	annot_exons
novel_circ_001835	570.602	519.955	43	33	GeneID_100701915	NC_031969.1	+	31189363	31193526	429	annot_exons
novel_circ_001836	92.8887	63.0249	7	4	GeneID_100701915	NC_031969.1	+	31189363	31196272	504	annot_exons
novel_circ_001837	26.5396	63.0249	2	4	GeneID_100701915	NC_031969.1	+	31201627	31206256	305	annot_exons
novel_circ_001838	26.5396	0	2	0	GeneID_100701915	NC_031969.1	+	31201627	31210666	560	annot_exons
novel_circ_001841	26.5396	0	2	0	GeneID_100699476	NC_031969.1	+	31571135	31574411	1027	annot_exons
novel_circ_001842	13.2698	31.5124	1	2	GeneID_100697873	NC_031969.1	-	32120375	32123290	249	annot_exons
novel_circ_001843	119.428	63.0249	9	4	GeneID_100697873	NC_031969.1	-	32120375	32123311	270	annot_exons
novel_circ_001844	0	78.7811	0	5	GeneID_100697873	NC_031969.1	-	32145382	32170122	1344	annot_exons
novel_circ_001845	212.317	126.05	16	8	GeneID_100697873	NC_031969.1	-	32145382	32197618	1433	annot_exons
novel_circ_001846	53.0793	0	4	0	GeneID_100697873	NC_031969.1	-	32168993	32197618	1219	annot_exons
novel_circ_001847	0	47.2687	0	3	GeneID_100697603	NC_031969.1	-	32241989	32253490	1365	annot_exons
novel_circ_001849	0	31.5124	0	2	GeneID_100693872	NC_031969.1	-	33236589	33245489	971	annot_exons
novel_circ_001850	26.5396	31.5124	2	2	GeneID_100693872	NC_031969.1	-	33242573	33243249	499	annot_exons
novel_circ_001851	185.777	0	14	0	GeneID_100693872	NC_031969.1	-	33242573	33245489	595	annot_exons
novel_circ_001852	0	31.5124	0	2	GeneID_100693345	NC_031969.1	-	33309104	33315329	1355	annot_exons
novel_circ_001854	145.968	0	11	0	GeneID_100692530	NC_031969.1	-	33526427	33529056	908	annot_exons
novel_circ_001855	26.5396	0	2	0	GeneID_100701640	NC_031969.1	-	33925459	33926148	243	annot_exons
novel_circ_001856	39.8094	94.5373	3	6	GeneID_100690919	NC_031969.1	-	34005853	34014264	440	annot_exons
novel_circ_001857	0	78.7811	0	5	GeneID_100690919	NC_031969.1	-	34005853	34031157	950	annot_exons
novel_circ_001858	13.2698	157.562	1	10	GeneID_100690919	NC_031969.1	-	34005853	34061009	1093	annot_exons
novel_circ_001859	159.238	173.318	12	11	GeneID_100690919	NC_031969.1	-	34014090	34021103	330	annot_exons
novel_circ_001860	13.2698	63.0249	1	4	GeneID_100690919	NC_031969.1	-	34014090	34024167	403	annot_exons
novel_circ_001861	26.5396	15.7562	2	1	GeneID_100690919	NC_031969.1	-	34014090	34031157	685	annot_exons
novel_circ_001862	225.587	378.149	17	24	GeneID_100690919	NC_031969.1	-	34014090	34061009	828	annot_exons
novel_circ_001863	132.698	63.0249	10	4	GeneID_100690919	NC_031969.1	-	34020949	34031157	510	annot_exons
novel_circ_001864	371.555	456.93	28	29	GeneID_100690919	NC_031969.1	-	34020949	34061009	653	annot_exons
novel_circ_001865	13.2698	47.2687	1	3	GeneID_100700008	NC_031969.1	-	34347283	34349141	977	annot_exons
novel_circ_001867	650.221	488.443	49	31	GeneID_102075819	NC_031969.1	+	34427639	34428278	546	annot_exons
novel_circ_001868	199.047	362.393	15	23	GeneID_100700825	NC_031969.1	+	35136099	35140140	1646	annot_exons
novel_circ_001869	132.698	78.7811	10	5	GeneID_100701096	NC_031969.1	+	35258472	35262418	471	annot_exons
novel_circ_001870	26.5396	31.5124	2	2	GeneID_100701096	NC_031969.1	+	35258472	35267509	902	annot_exons
novel_circ_001874	39.8094	78.7811	3	5	GeneID_100701331	NC_031969.1	+	35531731	35542910	795	annot_exons
novel_circ_001875	0	31.5124	0	2	GeneID_100701331	NC_031969.1	+	35531731	35561974	1585	annot_exons
novel_circ_001876	26.5396	63.0249	2	4	GeneID_100701331	NC_031969.1	+	35542325	35542910	493	annot_exons
novel_circ_001877	185.777	267.856	14	17	GeneID_100701331	NC_031969.1	+	35542325	35558097	1064	annot_exons
novel_circ_001878	53.0793	94.5373	4	6	GeneID_100701331	NC_031969.1	+	35542325	35573483	1556	annot_exons
novel_circ_001879	358.285	157.562	27	10	GeneID_100701331	NC_031969.1	+	35542325	35576439	1707	annot_exons
novel_circ_001881	0	31.5124	0	2	GeneID_100701331	NC_031969.1	+	35542325	35591359	2122	annot_exons
novel_circ_001882	53.0793	47.2687	4	3	GeneID_100701331	NC_031969.1	+	35542325	35591404	2167	annot_exons
novel_circ_001883	79.6189	47.2687	6	3	GeneID_100701331	NC_031969.1	+	35556523	35561974	790	annot_exons
novel_circ_001884	53.0793	31.5124	4	2	GeneID_100701331	NC_031969.1	+	35556523	35573483	1063	annot_exons
novel_circ_001885	172.508	94.5373	13	6	GeneID_100701331	NC_031969.1	+	35556523	35576439	1214	annot_exons
novel_circ_001886	66.3491	31.5124	5	2	GeneID_100701331	NC_031969.1	+	35557978	35573483	612	annot_exons
novel_circ_001887	0	63.0249	0	4	GeneID_100701331	NC_031969.1	+	35561756	35573483	492	annot_exons
novel_circ_001888	53.0793	15.7562	4	1	GeneID_100701331	NC_031969.1	+	35561756	35576439	643	annot_exons
novel_circ_001889	464.444	866.592	35	55	GeneID_100701331	NC_031969.1	+	35571046	35573483	273	annot_exons
novel_circ_001890	2003.74	1323.52	151	84	GeneID_100701331	NC_031969.1	+	35571046	35576439	424	annot_exons
novel_circ_001891	0	31.5124	0	2	GeneID_100701331	NC_031969.1	+	35571046	35589473	729	annot_exons
novel_circ_001892	66.3491	173.318	5	11	GeneID_100701331	NC_031969.1	+	35571046	35591404	884	annot_exons
novel_circ_001893	0	173.318	0	11	GeneID_100701331	NC_031969.1	+	35571048	35591361	839	annot_exons
novel_circ_001894	0	63.0249	0	4	GeneID_100702673	NC_031969.1	-	35812738	35841286	8018	annot_exons
novel_circ_001895	13.2698	31.5124	1	2	GeneID_100702673	NC_031969.1	-	35819412	35841286	7735	annot_exons
novel_circ_001896	769.649	1622.89	58	103	GeneID_100702673	NC_031969.1	-	35826822	35841286	7505	annot_exons
novel_circ_001899	0	31.5124	0	2	GeneID_100700052	NC_031969.1	-	35989059	35991501	426	annot_exons
novel_circ_001900	26.5396	0	2	0	GeneID_100700512	NC_031969.1	+	36014510	36015240	459	annot_exons
novel_circ_001901	26.5396	15.7562	2	1	GeneID_100700778	NC_031969.1	-	36052604	36057342	565	annot_exons
novel_circ_001902	53.0793	15.7562	4	1	GeneID_100704025	NC_031969.1	-	36097765	36120853	2606	annot_exons
novel_circ_001903	26.5396	0	2	0	GeneID_100704025	NC_031969.1	-	36109942	36120853	630	annot_exons
novel_circ_001904	159.238	31.5124	12	2	GeneID_100704025	NC_031969.1	-	36120133	36120853	285	annot_exons
novel_circ_001906	0	63.0249	0	4	GeneID_100705102	NC_031969.1	-	36386675	36397761	907	annot_exons
novel_circ_001907	13.2698	31.5124	1	2	GeneID_100705102	NC_031969.1	-	36390951	36395018	344	annot_exons
novel_circ_001908	26.5396	0	2	0	GeneID_100701867	NC_031969.1	-	36413568	36414132	177	annot_exons
novel_circ_001909	26.5396	78.7811	2	5	GeneID_100705368	NC_031969.1	+	36601004	36634752	1207	annot_exons
novel_circ_001910	26.5396	63.0249	2	4	GeneID_100705368	NC_031969.1	+	36611398	36634752	1075	annot_exons
novel_circ_001913	26.5396	0	2	0	GeneID_100705368	NC_031969.1	+	36670827	36675358	549	annot_exons
novel_circ_001914	0	94.5373	0	6	GeneID_100702407	NC_031969.1	-	36927784	37008451	576	annot_exons
novel_circ_001917	13.2698	252.1	1	16	GeneID_100702407	NC_031969.1	-	36946745	37008451	536	annot_exons
novel_circ_001918	53.0793	283.612	4	18	GeneID_100702407	NC_031969.1	-	36964643	37008451	403	annot_exons
novel_circ_001919	53.0793	63.0249	4	4	GeneID_100702945	NC_031969.1	-	37143652	37150107	339	annot_exons
novel_circ_001920	145.968	78.7811	11	5	GeneID_100702945	NC_031969.1	-	37149725	37150107	295	annot_exons
novel_circ_001921	26.5396	15.7562	2	1	GeneID_100703217	NC_031969.1	-	37164885	37166619	637	annot_exons
novel_circ_001922	145.968	15.7562	11	1	GeneID_100703485	NC_031969.1	-	37187609	37200263	729	annot_exons
novel_circ_001925	13.2698	31.5124	1	2	GeneID_100703485	NC_031969.1	-	37196366	37206923	464	annot_exons
novel_circ_001926	0	63.0249	0	4	GeneID_100703485	NC_031969.1	-	37197744	37228228	910	annot_exons
novel_circ_001927	26.5396	173.318	2	11	GeneID_100703485	NC_031969.1	-	37218518	37228228	315	annot_exons
novel_circ_001928	0	31.5124	0	2	GeneID_100704029	NC_031969.1	+	37338722	37340465	544	annot_exons
novel_circ_001929	39.8094	0	3	0	GeneID_100701143	NC_031969.1	-	37383636	37396329	1698	annot_exons
novel_circ_001930	39.8094	0	3	0	GeneID_100701143	NC_031969.1	-	37393438	37394120	509	annot_exons
novel_circ_001931	703.3	267.856	53	17	GeneID_100701143	NC_031969.1	-	37393438	37396329	1215	annot_exons
novel_circ_001933	26.5396	0	2	0	GeneID_100701416	NC_031969.1	+	37449471	37450435	340	annot_exons
novel_circ_001935	212.317	78.7811	16	5	GeneID_100697650	NC_031969.1	+	37745874	37746620	281	annot_exons
novel_circ_001936	185.777	157.562	14	10	GeneID_100698450	NC_031969.1	+	37787606	37790551	272	annot_exons
novel_circ_001937	398.094	157.562	30	10	GeneID_100698450	NC_031969.1	+	37787606	37793019	390	annot_exons
novel_circ_001938	0	31.5124	0	2	GeneID_100698450	NC_031969.1	+	37790341	37810723	884	annot_exons
novel_circ_001939	0	63.0249	0	4	GeneID_100698450	NC_031969.1	+	37792902	37812040	924	annot_exons
novel_circ_001940	53.0793	0	4	0	GeneID_100712197	NC_031970.1	-	73817	77425	505	annot_exons
novel_circ_001941	26.5396	0	2	0	GeneID_100711384	NC_031970.1	-	208738	210807	375	annot_exons
novel_circ_001942	0	63.0249	0	4	GeneID_100711384	NC_031970.1	-	212607	214456	363	annot_exons
novel_circ_001943	0	78.7811	0	5	GeneID_100711384	NC_031970.1	-	225326	234706	1440	annot_exons
novel_circ_001946	39.8094	0	3	0	GeneID_100709784	NC_031970.1	-	523691	524648	292	annot_exons
novel_circ_001947	119.428	31.5124	9	2	GeneID_100709248	NC_031970.1	+	1127551	1139297	332	annot_exons
novel_circ_001949	39.8094	0	3	0	GeneID_100709248	NC_031970.1	+	1217267	1267163	1491	annot_exons
novel_circ_001950	132.698	267.856	10	17	GeneID_100709248	NC_031970.1	+	1249550	1267163	1086	annot_exons
novel_circ_001951	132.698	315.124	10	20	GeneID_100709248	NC_031970.1	+	1264350	1267163	901	annot_exons
novel_circ_001953	278.666	472.687	21	30	GeneID_100708976	NC_031970.1	-	1506834	1541586	604	annot_exons
novel_circ_001954	119.428	299.368	9	19	GeneID_100708976	NC_031970.1	-	1506834	1556467	746	annot_exons
novel_circ_001955	53.0793	63.0249	4	4	GeneID_100708976	NC_031970.1	-	1506834	1571190	903	annot_exons
novel_circ_001956	26.5396	15.7562	2	1	GeneID_100708976	NC_031970.1	-	1506834	1600084	1703	annot_exons
novel_circ_001957	451.174	362.393	34	23	GeneID_100708976	NC_031970.1	-	1538624	1541586	463	annot_exons
novel_circ_001958	172.508	393.905	13	25	GeneID_100708976	NC_031970.1	-	1538624	1556467	605	annot_exons
novel_circ_001959	26.5396	63.0249	2	4	GeneID_100708976	NC_031970.1	-	1538624	1571190	762	annot_exons
novel_circ_001960	66.3491	189.075	5	12	GeneID_100708976	NC_031970.1	-	1538624	1575964	878	annot_exons
novel_circ_001961	0	31.5124	0	2	GeneID_100708976	NC_031970.1	-	1538624	1633340	2203	annot_exons
novel_circ_001962	39.8094	141.806	3	9	GeneID_100708976	NC_031970.1	-	1556326	1600084	1099	annot_exons
novel_circ_001963	13.2698	78.7811	1	5	GeneID_100708976	NC_031970.1	-	1571034	1600084	957	annot_exons
novel_circ_001964	26.5396	63.0249	2	4	GeneID_100708976	NC_031970.1	-	1626089	1633340	319	annot_exons
novel_circ_001965	26.5396	15.7562	2	1	GeneID_100708976	NC_031970.1	-	1633002	1633340	252	annot_exons
novel_circ_001966	26.5396	15.7562	2	1	GeneID_100708976	NC_031970.1	-	1656568	1665032	440	annot_exons
novel_circ_001967	26.5396	15.7562	2	1	GeneID_100708976	NC_031970.1	-	1656568	1732125	887	annot_exons
novel_circ_001968	53.0793	31.5124	4	2	GeneID_100708976	NC_031970.1	-	1664054	1665032	318	annot_exons
novel_circ_001969	119.428	0	9	0	GeneID_100708976	NC_031970.1	-	1664054	1702694	651	annot_exons
novel_circ_001970	0	63.0249	0	4	GeneID_100708976	NC_031970.1	-	1664054	1732125	765	annot_exons
novel_circ_001972	66.3491	94.5373	5	6	GeneID_100708976	NC_031970.1	-	1702362	1732125	447	annot_exons
novel_circ_001974	172.508	220.587	13	14	GeneID_100707086	NC_031970.1	+	2211220	2212065	441	annot_exons
novel_circ_001975	185.777	252.1	14	16	GeneID_100707086	NC_031970.1	+	2211220	2216877	825	annot_exons
novel_circ_001976	66.3491	110.294	5	7	GeneID_100706821	NC_031970.1	+	2274112	2276526	510	annot_exons
novel_circ_001977	345.015	315.124	26	20	GeneID_100706549	NC_031970.1	-	2370428	2371662	721	annot_exons
novel_circ_001980	0	31.5124	0	2	GeneID_100691456	NC_031970.1	+	2739408	2751349	401	annot_exons
novel_circ_001981	0	31.5124	0	2	GeneID_100691456	NC_031970.1	+	2765812	2774986	276	annot_exons
novel_circ_001982	0	31.5124	0	2	GeneID_100705594	NC_031970.1	-	3109503	3112929	784	annot_exons
novel_circ_001983	39.8094	0	3	0	GeneID_100705594	NC_031970.1	-	3126351	3133294	1049	annot_exons
novel_circ_001984	66.3491	63.0249	5	4	GeneID_100712465	NC_031970.1	-	3530437	3578938	545	annot_exons
novel_circ_001985	0	47.2687	0	3	GeneID_100712465	NC_031970.1	-	3530437	3588806	784	annot_exons
novel_circ_001986	53.0793	173.318	4	11	GeneID_100712465	NC_031970.1	-	3546427	3578938	471	annot_exons
novel_circ_001987	53.0793	0	4	0	GeneID_100712465	NC_031970.1	-	3568808	3588806	549	annot_exons
novel_circ_001988	92.8887	47.2687	7	3	GeneID_100712465	NC_031970.1	-	3568808	3595055	632	annot_exons
novel_circ_001989	53.0793	47.2687	4	3	GeneID_100712465	NC_031970.1	-	3578757	3604715	777	annot_exons
novel_circ_001992	3848.25	3560.91	290	226	GeneID_100690588	NC_031970.1	+	3894766	3895339	489	annot_exons
novel_circ_001997	0	47.2687	0	3	GeneID_100706369	NC_031970.1	-	5063189	5068145	1797	annot_exons
novel_circ_001999	39.8094	15.7562	3	1	GeneID_100693683	NC_031970.1	-	5141007	5145736	1159	annot_exons
novel_circ_002001	39.8094	126.05	3	8	GeneID_100697936	NC_031970.1	+	5211036	5211989	537	annot_exons
novel_circ_002002	53.0793	31.5124	4	2	GeneID_100695288	NC_031970.1	+	5346106	5348289	303	annot_exons
novel_circ_002003	66.3491	0	5	0	GeneID_100695288	NC_031970.1	+	5346106	5352916	408	annot_exons
novel_circ_002004	0	47.2687	0	3	GeneID_100695551	NC_031970.1	-	5396237	5403113	849	annot_exons
novel_circ_002005	26.5396	0	2	0	GeneID_100695551	NC_031970.1	-	5396237	5406703	1028	annot_exons
novel_circ_002006	26.5396	0	2	0	GeneID_100695551	NC_031970.1	-	5401483	5406703	606	annot_exons
novel_circ_002007	26.5396	0	2	0	GeneID_100695551	NC_031970.1	-	5422730	5459938	549	annot_exons
novel_circ_002008	0	31.5124	0	2	GeneID_100695551	NC_031970.1	-	5452182	5476502	634	annot_exons
novel_circ_002009	159.238	63.0249	12	4	GeneID_100695551	NC_031970.1	-	5503513	5564136	542	annot_exons
novel_circ_002010	199.047	15.7562	15	1	GeneID_100695551	NC_031970.1	-	5519136	5564136	446	annot_exons
novel_circ_002011	0	31.5124	0	2	GeneID_100695819	NC_031970.1	-	5685084	5696827	1150	annot_exons
novel_circ_002012	0	31.5124	0	2	GeneID_100696077	NC_031970.1	-	5882822	5888774	508	annot_exons
novel_circ_002013	0	47.2687	0	3	GeneID_100696077	NC_031970.1	-	5900368	5901580	423	annot_exons
novel_circ_002016	145.968	47.2687	11	3	GeneID_100696343	NC_031970.1	+	6071075	6087578	448	annot_exons
novel_circ_002017	13.2698	31.5124	1	2	GeneID_100711731	NC_031970.1	-	6385818	6387521	549	annot_exons
novel_circ_002018	145.968	31.5124	11	2	GeneID_100696872	NC_031970.1	+	6406634	6423433	837	annot_exons
novel_circ_002019	39.8094	47.2687	3	3	GeneID_100696872	NC_031970.1	+	6406634	6431936	958	annot_exons
novel_circ_002020	39.8094	0	3	0	GeneID_100696872	NC_031970.1	+	6407112	6423433	547	annot_exons
novel_circ_002021	13.2698	63.0249	1	4	GeneID_100690183	NC_031970.1	+	6686804	6690936	397	annot_exons
novel_circ_002022	53.0793	0	4	0	GeneID_100690183	NC_031970.1	+	6686804	6696989	590	annot_exons
novel_circ_002023	53.0793	0	4	0	GeneID_100692694	NC_031970.1	+	7149009	7150001	84	annot_exons
novel_circ_002024	13.2698	63.0249	1	4	GeneID_100692152	NC_031970.1	-	7378784	7379489	214	annot_exons
novel_circ_002025	0	31.5124	0	2	GeneID_100694491	NC_031970.1	-	7604681	7606778	441	annot_exons
novel_circ_002027	26.5396	0	2	0	GeneID_100696076	NC_031970.1	+	7663111	7663942	733	annot_exons
novel_circ_002030	26.5396	0	2	0	GeneID_100699278	NC_031970.1	-	7807659	7809032	91	annot_exons
novel_circ_002031	106.159	15.7562	8	1	GeneID_100699278	NC_031970.1	-	7808981	7813301	853	annot_exons
novel_circ_002038	238.857	110.294	18	7	GeneID_100700810	NC_031970.1	+	8027158	8030692	2112	annot_exons
novel_circ_002041	79.6189	94.5373	6	6	GeneID_100702438	NC_031970.1	+	8304002	8312963	410	annot_exons
novel_circ_002042	26.5396	15.7562	2	1	GeneID_100702438	NC_031970.1	+	8304002	8333726	566	annot_exons
novel_circ_002043	0	31.5124	0	2	GeneID_100702438	NC_031970.1	+	8304002	8339899	711	annot_exons
novel_circ_002044	0	31.5124	0	2	GeneID_100702438	NC_031970.1	+	8304002	8351451	884	annot_exons
novel_circ_002045	26.5396	0	2	0	GeneID_100702438	NC_031970.1	+	8351279	8359251	311	annot_exons
novel_circ_002046	411.364	582.98	31	37	GeneID_100702438	NC_031970.1	+	8351279	8365079	751	annot_exons
novel_circ_002047	26.5396	0	2	0	GeneID_100702438	NC_031970.1	+	8351279	8368743	894	annot_exons
novel_circ_002048	0	31.5124	0	2	GeneID_100702438	NC_031970.1	+	8359114	8368752	730	annot_exons
novel_circ_002049	0	31.5124	0	2	GeneID_100707880	NC_031970.1	+	9050463	9057132	503	annot_exons
novel_circ_002050	0	31.5124	0	2	GeneID_100708963	NC_031970.1	+	9757569	9767148	766	annot_exons
novel_circ_002051	26.5396	0	2	0	GeneID_100708963	NC_031970.1	+	9757569	9772857	1854	annot_exons
novel_circ_002052	252.126	189.075	19	12	GeneID_100708963	NC_031970.1	+	9771844	9772857	843	annot_exons
novel_circ_002053	0	31.5124	0	2	GeneID_100708963	NC_031970.1	+	9771844	9794762	1842	annot_exons
novel_circ_002054	0	31.5124	0	2	GeneID_100708963	NC_031970.1	+	9794516	9811355	1686	annot_exons
novel_circ_002055	0	94.5373	0	6	GeneID_100707268	NC_031970.1	+	9864844	9866025	533	annot_exons
novel_circ_002056	53.0793	31.5124	4	2	GeneID_100709499	NC_031970.1	-	10017453	10018305	584	annot_exons
novel_circ_002057	92.8887	94.5373	7	6	GeneID_100708877	NC_031970.1	-	10257675	10299892	738	annot_exons
novel_circ_002058	26.5396	0	2	0	GeneID_100708877	NC_031970.1	-	10276755	10290543	477	annot_exons
novel_circ_002059	199.047	15.7562	15	1	GeneID_100708877	NC_031970.1	-	10276755	10299892	610	annot_exons
novel_circ_002060	225.587	63.0249	17	4	GeneID_100708877	NC_031970.1	-	10288144	10299892	432	annot_exons
novel_circ_002062	26.5396	0	2	0	GeneID_100711730	NC_031970.1	-	10341636	10342289	329	annot_exons
novel_circ_002063	26.5396	94.5373	2	6	GeneID_100709147	NC_031970.1	+	10373354	10374177	518	annot_exons
novel_circ_002064	0	31.5124	0	2	GeneID_100710750	NC_031970.1	-	10505179	10521339	1243	annot_exons
novel_circ_002065	530.793	346.637	40	22	GeneID_100692063	NC_031970.1	+	10556971	10557794	570	annot_exons
novel_circ_002066	0	63.0249	0	4	GeneID_100706533	NC_031970.1	+	10839091	10840767	324	annot_exons
novel_circ_002067	0	31.5124	0	2	GeneID_109194178	NC_031970.1	-	11260506	11263754	711	annot_exons
novel_circ_002068	26.5396	0	2	0	GeneID_109194178	NC_031970.1	-	11277366	11284966	760	annot_exons
novel_circ_002069	0	31.5124	0	2	GeneID_109194178	NC_031970.1	-	11287764	11309323	641	annot_exons
novel_circ_002070	26.5396	0	2	0	GeneID_109194178	NC_031970.1	-	11287764	11324350	756	annot_exons
novel_circ_002072	66.3491	0	5	0	GeneID_109194178	NC_031970.1	-	11309123	11324350	316	annot_exons
novel_circ_002073	0	31.5124	0	2	GeneID_109194178	NC_031970.1	-	11324236	11348277	735	annot_exons
novel_circ_002074	79.6189	15.7562	6	1	GeneID_109194178	NC_031970.1	-	11330806	11335469	479	annot_exons
novel_circ_002075	79.6189	0	6	0	GeneID_109194178	NC_031970.1	-	11348137	11398727	1753	annot_exons
novel_circ_002076	39.8094	157.562	3	10	GeneID_109194178	NC_031970.1	-	11382597	11398727	1612	annot_exons
novel_circ_002077	0	63.0249	0	4	GeneID_100703871	NC_031970.1	-	11535719	11537087	312	annot_exons
novel_circ_002080	0	94.5373	0	6	GeneID_100703055	NC_031970.1	-	11590682	11602652	930	annot_exons
novel_circ_002081	26.5396	0	2	0	GeneID_100701712	NC_031970.1	+	12006011	12015570	2029	annot_exons
novel_circ_002084	13.2698	31.5124	1	2	GeneID_100701170	NC_031970.1	+	12151141	12151949	457	annot_exons
novel_circ_002085	39.8094	0	3	0	GeneID_100700891	NC_031970.1	-	12194520	12199456	633	annot_exons
novel_circ_002086	0	31.5124	0	2	GeneID_100699005	NC_031970.1	+	12424212	12439962	2865	annot_exons
novel_circ_002087	0	47.2687	0	3	GeneID_100691877	NC_031970.1	+	12506025	12511579	221	annot_exons
novel_circ_002088	0	47.2687	0	3	GeneID_100691877	NC_031970.1	+	12506025	12562613	494	annot_exons
novel_circ_002089	0	31.5124	0	2	GeneID_100691877	NC_031970.1	+	12508640	12511579	117	annot_exons
novel_circ_002090	66.3491	94.5373	5	6	GeneID_100691877	NC_031970.1	+	12511503	12562613	350	annot_exons
novel_circ_002091	0	63.0249	0	4	GeneID_100691877	NC_031970.1	+	12548426	12562613	273	annot_exons
novel_circ_002092	26.5396	31.5124	2	2	GeneID_100691877	NC_031970.1	+	12561275	12562613	209	annot_exons
novel_circ_002093	26.5396	47.2687	2	3	GeneID_100697666	NC_031970.1	+	12727078	12746449	246	annot_exons
novel_circ_002095	26.5396	110.294	2	7	GeneID_100712178	NC_031970.1	-	13083265	13093931	795	annot_exons
novel_circ_002096	159.238	157.562	12	10	GeneID_100695811	NC_031970.1	+	13346348	13348024	408	annot_exons
novel_circ_002097	66.3491	0	5	0	GeneID_100695811	NC_031970.1	+	13350853	13354148	664	annot_exons
novel_circ_002098	26.5396	0	2	0	GeneID_100695012	NC_031970.1	+	13459455	13469531	961	annot_exons
novel_circ_002099	26.5396	0	2	0	GeneID_100695012	NC_031970.1	+	13464107	13464952	272	annot_exons
novel_circ_002100	92.8887	173.318	7	11	GeneID_100695012	NC_031970.1	+	13464107	13465353	473	annot_exons
novel_circ_002101	0	63.0249	0	4	GeneID_100699061	NC_031970.1	+	13777400	13784192	1130	annot_exons
novel_circ_002103	26.5396	31.5124	2	2	GeneID_100701765	NC_031970.1	-	13956347	13957015	290	annot_exons
novel_circ_002104	0	110.294	0	7	GeneID_100694810	NC_031970.1	-	14003986	14004469	294	annot_exons
novel_circ_002107	132.698	141.806	10	9	GeneID_100702840	NC_031970.1	+	14130381	14140770	8395	annot_exons
novel_circ_002113	53.0793	0	4	0	GeneID_100703106	NC_031970.1	+	14175323	14180137	1002	annot_exons
novel_circ_002114	26.5396	0	2	0	GeneID_100703106	NC_031970.1	+	14175323	14181101	1140	annot_exons
novel_circ_002115	53.0793	0	4	0	GeneID_102079987	NC_031970.1	-	14482855	14485116	1389	annot_exons
novel_circ_002116	53.0793	31.5124	4	2	GeneID_100693494	NC_031970.1	+	14581132	14583213	710	annot_exons
novel_circ_002117	79.6189	0	6	0	GeneID_100693494	NC_031970.1	+	14581132	14585577	1105	annot_exons
novel_circ_002124	13.2698	47.2687	1	3	GeneID_100689729	NC_031970.1	+	15700240	15709343	925	annot_exons
novel_circ_002125	39.8094	0	3	0	GeneID_100690807	NC_031970.1	-	15747172	15755241	1284	annot_exons
novel_circ_002126	0	31.5124	0	2	GeneID_100690807	NC_031970.1	-	15758004	15758856	691	annot_exons
novel_circ_002127	53.0793	126.05	4	8	GeneID_100692059	NC_031970.1	-	15842470	15843973	240	annot_exons
novel_circ_002128	0	63.0249	0	4	GeneID_100694038	NC_031970.1	+	16176835	16189422	1766	annot_exons
novel_circ_002129	0	94.5373	0	6	GeneID_100694038	NC_031970.1	+	16188073	16189422	408	annot_exons
novel_circ_002130	0	31.5124	0	2	GeneID_100694313	NC_031970.1	+	16214698	16228303	775	annot_exons
novel_circ_002131	13.2698	94.5373	1	6	GeneID_100694313	NC_031970.1	+	16222797	16238515	1131	annot_exons
novel_circ_002132	92.8887	141.806	7	9	GeneID_100694313	NC_031970.1	+	16222797	16243514	1227	annot_exons
novel_circ_002133	13.2698	47.2687	1	3	GeneID_100694313	NC_031970.1	+	16225657	16238515	706	annot_exons
novel_circ_002134	0	94.5373	0	6	GeneID_100694313	NC_031970.1	+	16225657	16243514	802	annot_exons
novel_circ_002135	53.0793	0	4	0	GeneID_100695906	NC_031970.1	+	16467193	16470945	1590	annot_exons
novel_circ_002136	92.8887	0	7	0	GeneID_100696164	NC_031970.1	+	16498468	16500389	472	annot_exons
novel_circ_002137	185.777	567.224	14	36	GeneID_100696164	NC_031970.1	+	16511362	16513334	227	annot_exons
novel_circ_002138	39.8094	31.5124	3	2	GeneID_100696164	NC_031970.1	+	16511362	16513832	328	annot_exons
novel_circ_002139	0	31.5124	0	2	GeneID_100696164	NC_031970.1	+	16511362	16514656	598	annot_exons
novel_circ_002140	0	31.5124	0	2	GeneID_100698031	NC_031970.1	-	16982197	16983472	317	annot_exons
novel_circ_002141	53.0793	0	4	0	GeneID_100701263	NC_031970.1	-	17246772	17250862	274	annot_exons
novel_circ_002143	53.0793	15.7562	4	1	GeneID_100703959	NC_031970.1	+	17632584	17634164	216	annot_exons
novel_circ_002144	0	31.5124	0	2	GeneID_100703959	NC_031970.1	+	17640777	17650979	2168	annot_exons
novel_circ_002145	26.5396	0	2	0	GeneID_100704230	NC_031970.1	+	17685983	17687671	585	annot_exons
novel_circ_002146	26.5396	0	2	0	GeneID_100704230	NC_031970.1	+	17709058	17715843	1821	annot_exons
novel_circ_002147	53.0793	47.2687	4	3	GeneID_100704230	NC_031970.1	+	17709058	17727072	4512	annot_exons
novel_circ_002148	92.8887	94.5373	7	6	GeneID_100706099	NC_031970.1	+	17951908	17952725	542	annot_exons
novel_circ_002150	995.236	1607.13	75	102	GeneID_100706902	NC_031970.1	-	18055804	18057011	513	annot_exons
novel_circ_002151	79.6189	94.5373	6	6	GeneID_100706902	NC_031970.1	-	18055804	18061413	651	annot_exons
novel_circ_002153	159.238	47.2687	12	3	GeneID_100707699	NC_031970.1	-	18149702	18150474	546	annot_exons
novel_circ_002154	172.508	267.856	13	17	GeneID_100709046	NC_031970.1	-	18224754	18242080	3403	annot_exons
novel_circ_002155	172.508	173.318	13	11	GeneID_100709046	NC_031970.1	-	18225344	18229455	1830	annot_exons
novel_circ_002156	53.0793	31.5124	4	2	GeneID_100709046	NC_031970.1	-	18233213	18235619	420	annot_exons
novel_circ_002157	0	31.5124	0	2	GeneID_100709046	NC_031970.1	-	18233213	18242080	1202	annot_exons
novel_circ_002158	26.5396	31.5124	2	2	GeneID_100709046	NC_031970.1	-	18233944	18237547	420	annot_exons
novel_circ_002159	66.3491	15.7562	5	1	GeneID_100712531	NC_031970.1	+	18637019	18637858	478	annot_exons
novel_circ_002162	13.2698	63.0249	1	4	GeneID_100711418	NC_031970.1	+	19136018	19137962	362	annot_exons
novel_circ_002163	106.159	47.2687	8	3	GeneID_100711689	NC_031970.1	+	19162610	19166663	861	annot_exons
novel_circ_002164	53.0793	15.7562	4	1	GeneID_100690067	NC_031970.1	+	19251919	19260370	338	annot_exons
novel_circ_002166	145.968	63.0249	11	4	GeneID_100704187	NC_031970.1	+	19779880	19796842	386	annot_exons
novel_circ_002167	26.5396	0	2	0	GeneID_100704187	NC_031970.1	+	19779880	19806309	572	annot_exons
novel_circ_002168	26.5396	0	2	0	GeneID_100704187	NC_031970.1	+	19779880	19830045	4045	annot_exons
novel_circ_002169	0	63.0249	0	4	GeneID_100704187	NC_031970.1	+	19809796	19810746	460	annot_exons
novel_circ_002170	0	31.5124	0	2	GeneID_100704187	NC_031970.1	+	19826019	19832316	3305	annot_exons
novel_circ_002173	53.0793	0	4	0	GeneID_100704721	NC_031970.1	-	19894020	19895955	528	annot_exons
novel_circ_002175	53.0793	0	4	0	GeneID_100698968	NC_031970.1	+	20464972	20466151	898	annot_exons
novel_circ_002176	0	31.5124	0	2	GeneID_100698968	NC_031970.1	+	20504603	20507144	405	annot_exons
novel_circ_002178	437.904	330.881	33	21	GeneID_100700221	NC_031970.1	-	20728697	20729677	432	annot_exons
novel_circ_002180	145.968	141.806	11	9	GeneID_100709001	NC_031970.1	+	21043774	21055627	1134	annot_exons
novel_circ_002181	39.8094	47.2687	3	3	GeneID_100709001	NC_031970.1	+	21053009	21054545	432	annot_exons
novel_circ_002182	79.6189	157.562	6	10	GeneID_100709540	NC_031970.1	-	21099362	21102240	802	annot_exons
novel_circ_002183	53.0793	31.5124	4	2	GeneID_100709540	NC_031970.1	-	21099362	21105112	1172	annot_exons
novel_circ_002184	13.2698	47.2687	1	3	GeneID_109194223	NC_031970.1	+	21277350	21291265	813	annot_exons
novel_circ_002185	2242.6	409.662	169	26	GeneID_109194223	NC_031970.1	+	21277350	21296187	1261	annot_exons
novel_circ_002186	79.6189	0	6	0	GeneID_109194223	NC_031970.1	+	21277350	21302283	1861	annot_exons
novel_circ_002187	53.0793	0	4	0	GeneID_109194223	NC_031970.1	+	21285996	21296187	861	annot_exons
novel_circ_002190	1897.58	236.343	143	15	GeneID_109194223	NC_031970.1	+	21287348	21296187	825	annot_exons
novel_circ_002191	66.3491	157.562	5	10	GeneID_109194223	NC_031970.1	+	21296058	21300264	445	annot_exons
novel_circ_002192	0	31.5124	0	2	GeneID_109194223	NC_031970.1	+	21299690	21302283	600	annot_exons
novel_circ_002195	79.6189	15.7562	6	1	GeneID_100702838	NC_031970.1	-	21557684	21560369	449	annot_exons
novel_circ_002196	106.159	15.7562	8	1	GeneID_100702838	NC_031970.1	-	21578822	21598691	1670	annot_exons
novel_circ_002197	92.8887	141.806	7	9	GeneID_100702838	NC_031970.1	-	21593611	21598691	1535	annot_exons
novel_circ_002200	13.2698	31.5124	1	2	GeneID_100702812	NC_031970.1	-	21838567	21852477	327	annot_exons
novel_circ_002202	13.2698	47.2687	1	3	GeneID_100689934	NC_031970.1	+	21914332	21931398	522	annot_exons
novel_circ_002205	0	31.5124	0	2	GeneID_100702011	NC_031970.1	-	22307984	22328968	891	annot_exons
novel_circ_002207	79.6189	47.2687	6	3	GeneID_100702011	NC_031970.1	-	22316276	22328968	597	annot_exons
novel_circ_002208	53.0793	31.5124	4	2	GeneID_100701736	NC_031970.1	-	22611604	22621514	688	annot_exons
novel_circ_002209	26.5396	63.0249	2	4	GeneID_100701736	NC_031970.1	-	22617659	22643015	725	annot_exons
novel_circ_002210	26.5396	0	2	0	GeneID_100701736	NC_031970.1	-	22621300	22625799	302	annot_exons
novel_circ_002211	66.3491	63.0249	5	4	GeneID_100701736	NC_031970.1	-	22642894	22690916	2101	annot_exons
novel_circ_002212	0	31.5124	0	2	GeneID_100701736	NC_031970.1	-	22656562	22669372	345	annot_exons
novel_circ_002213	53.0793	0	4	0	GeneID_100701736	NC_031970.1	-	22656562	22690916	1979	annot_exons
novel_circ_002214	13.2698	78.7811	1	5	GeneID_100701736	NC_031970.1	-	22667771	22690916	1878	annot_exons
novel_circ_002215	39.8094	173.318	3	11	GeneID_100701736	NC_031970.1	-	22681092	22688762	890	annot_exons
novel_circ_002216	26.5396	0	2	0	GeneID_100701736	NC_031970.1	-	22681092	22690916	1051	annot_exons
novel_circ_002217	26.5396	0	2	0	GeneID_100710150	NC_031970.1	-	22821077	22824054	724	annot_exons
novel_circ_002218	0	31.5124	0	2	GeneID_100701191	NC_031970.1	-	22846470	22850857	612	annot_exons
novel_circ_002219	0	47.2687	0	3	GeneID_102080578	NC_031970.1	-	22928216	22930365	327	annot_exons
novel_circ_002221	53.0793	15.7562	4	1	GeneID_100696627	NC_031970.1	-	23313216	23335756	2396	annot_exons
novel_circ_002222	145.968	63.0249	11	4	GeneID_100696627	NC_031970.1	-	23323698	23335756	1487	annot_exons
novel_circ_002224	0	157.562	0	10	GeneID_100696627	NC_031970.1	-	23328989	23335756	1112	annot_exons
novel_circ_002225	26.5396	0	2	0	GeneID_100696627	NC_031970.1	-	23328989	23351937	1856	annot_exons
novel_circ_002226	106.159	0	8	0	GeneID_100696627	NC_031970.1	-	23348104	23351937	708	annot_exons
novel_circ_002230	39.8094	0	3	0	GeneID_100696627	NC_031970.1	-	23370577	23397189	494	annot_exons
novel_circ_002231	0	94.5373	0	6	GeneID_100695039	NC_031970.1	+	23857868	23862826	471	annot_exons
novel_circ_002233	0	31.5124	0	2	GeneID_100705334	NC_031970.1	-	24046718	24047628	544	annot_exons
novel_circ_002237	26.5396	0	2	0	GeneID_100693168	NC_031970.1	-	24204088	24205620	463	annot_exons
novel_circ_002238	26.5396	0	2	0	GeneID_100692353	NC_031970.1	+	24527611	24533145	645	annot_exons
novel_circ_002239	0	31.5124	0	2	GeneID_100692353	NC_031970.1	+	24530695	24596822	1074	annot_exons
novel_circ_002240	39.8094	31.5124	3	2	GeneID_100692353	NC_031970.1	+	24549662	24596822	701	annot_exons
novel_circ_002241	26.5396	47.2687	2	3	GeneID_100692353	NC_031970.1	+	24583413	24584667	297	annot_exons
novel_circ_002242	238.857	220.587	18	14	GeneID_100692353	NC_031970.1	+	24583413	24596822	407	annot_exons
novel_circ_002243	79.6189	47.2687	6	3	GeneID_100692353	NC_031970.1	+	24583413	24625452	989	annot_exons
novel_circ_002244	0	31.5124	0	2	GeneID_100692353	NC_031970.1	+	24625176	24648975	507	annot_exons
novel_circ_002245	79.6189	47.2687	6	3	GeneID_100692353	NC_031970.1	+	24648840	24671488	354	annot_exons
novel_circ_002246	39.8094	15.7562	3	1	GeneID_100692353	NC_031970.1	+	24648840	24677453	471	annot_exons
novel_circ_002247	0	47.2687	0	3	GeneID_100692353	NC_031970.1	+	24648840	24689402	674	annot_exons
novel_circ_002248	371.555	283.612	28	18	GeneID_100692353	NC_031970.1	+	24648840	24692982	762	annot_exons
novel_circ_002249	53.0793	0	4	0	GeneID_100692353	NC_031970.1	+	24648840	24715917	1100	annot_exons
novel_circ_002250	119.428	204.831	9	13	GeneID_100692353	NC_031970.1	+	24671334	24689402	475	annot_exons
novel_circ_002251	1048.32	1118.69	79	71	GeneID_100692353	NC_031970.1	+	24671334	24692982	563	annot_exons
novel_circ_002252	0	47.2687	0	3	GeneID_100692353	NC_031970.1	+	24671334	24713341	649	annot_exons
novel_circ_002253	66.3491	0	5	0	GeneID_100692353	NC_031970.1	+	24671334	24715917	901	annot_exons
novel_circ_002254	119.428	141.806	9	9	GeneID_100692353	NC_031970.1	+	24677220	24689402	320	annot_exons
novel_circ_002255	145.968	173.318	11	11	GeneID_100692353	NC_031970.1	+	24677220	24692982	408	annot_exons
novel_circ_002256	26.5396	0	2	0	GeneID_100692353	NC_031970.1	+	24677220	24722484	901	annot_exons
novel_circ_002257	26.5396	0	2	0	GeneID_100692353	NC_031970.1	+	24688694	24692982	291	annot_exons
novel_circ_002258	39.8094	0	3	0	GeneID_100692353	NC_031970.1	+	24713265	24726484	620	annot_exons
novel_circ_002259	0	31.5124	0	2	GeneID_100691544	NC_031970.1	+	25125897	25136873	987	annot_exons
novel_circ_002260	66.3491	31.5124	5	2	GeneID_100691544	NC_031970.1	+	25142262	25143317	496	annot_exons
novel_circ_002261	13.2698	47.2687	1	3	GeneID_100691544	NC_031970.1	+	25153319	25154471	210	annot_exons
novel_circ_002262	106.159	0	8	0	GeneID_100691544	NC_031970.1	+	25171524	25173726	538	annot_exons
novel_circ_002263	0	47.2687	0	3	GeneID_100704529	NC_031970.1	-	25200531	25207529	972	annot_exons
novel_circ_002264	145.968	0	11	0	GeneID_100704529	NC_031970.1	-	25207060	25207529	365	annot_exons
novel_circ_002265	132.698	47.2687	10	3	GeneID_100703811	NC_031970.1	-	25350323	25357741	560	annot_exons
novel_circ_002266	66.3491	15.7562	5	1	GeneID_100703811	NC_031970.1	-	25350323	25364922	705	annot_exons
novel_circ_002267	39.8094	63.0249	3	4	GeneID_100703811	NC_031970.1	-	25354522	25364922	500	annot_exons
novel_circ_002268	26.5396	31.5124	2	2	GeneID_100691193	NC_031970.1	-	25935164	25945122	505	annot_exons
novel_circ_002269	0	47.2687	0	3	GeneID_100691193	NC_031970.1	-	25935164	25966031	952	annot_exons
novel_circ_002270	92.8887	110.294	7	7	GeneID_100692085	NC_031970.1	-	26768574	26771096	679	annot_exons
novel_circ_002271	26.5396	0	2	0	GeneID_102083249	NC_031970.1	+	27019411	27021683	401	annot_exons
novel_circ_002273	0	31.5124	0	2	GeneID_100711482	NC_031970.1	+	27294796	27296668	423	annot_exons
novel_circ_002274	92.8887	47.2687	7	3	GeneID_100710059	NC_031970.1	+	27423975	27425621	447	annot_exons
novel_circ_002275	53.0793	78.7811	4	5	GeneID_100710059	NC_031970.1	+	27423975	27438786	884	annot_exons
novel_circ_002277	26.5396	0	2	0	GeneID_100710059	NC_031970.1	+	27452406	27452830	325	annot_exons
novel_circ_002281	26.5396	31.5124	2	2	GeneID_100710059	NC_031970.1	+	27458569	27464223	445	annot_exons
novel_circ_002283	92.8887	173.318	7	11	GeneID_100710059	NC_031970.1	+	27463801	27465150	461	annot_exons
novel_circ_002284	66.3491	0	5	0	GeneID_100710059	NC_031970.1	+	27463801	27467850	1065	annot_exons
novel_circ_002285	0	31.5124	0	2	GeneID_100710059	NC_031970.1	+	27464082	27467573	800	annot_exons
novel_circ_002286	0	126.05	0	8	GeneID_100710059	NC_031970.1	+	27464989	27467850	766	annot_exons
novel_circ_002288	39.8094	0	3	0	GeneID_100705237	NC_031970.1	-	27495701	27521283	1879	annot_exons
novel_circ_002289	26.5396	63.0249	2	4	GeneID_100705237	NC_031970.1	-	27500504	27513603	699	annot_exons
novel_circ_002290	53.0793	0	4	0	GeneID_100705237	NC_031970.1	-	27500504	27521283	848	annot_exons
novel_circ_002291	53.0793	94.5373	4	6	GeneID_100705237	NC_031970.1	-	27521135	27533943	329	annot_exons
novel_circ_002292	0	47.2687	0	3	GeneID_100705237	NC_031970.1	-	27521135	27561223	425	annot_exons
novel_circ_002295	13.2698	63.0249	1	4	GeneID_100708712	NC_031970.1	-	27935747	27937638	399	annot_exons
novel_circ_002298	53.0793	0	4	0	GeneID_100707363	NC_031970.1	+	28095519	28101860	767	annot_exons
novel_circ_002300	53.0793	31.5124	4	2	GeneID_100701467	NC_031970.1	+	28199802	28200385	404	annot_exons
novel_circ_002301	0	31.5124	0	2	GeneID_100705766	NC_031970.1	-	28325162	28326818	747	annot_exons
novel_circ_002302	26.5396	141.806	2	9	GeneID_100700917	NC_031970.1	+	28364067	28366842	1078	annot_exons
novel_circ_002305	0	31.5124	0	2	GeneID_102079371	NC_031970.1	-	28500834	28544892	1474	annot_exons
novel_circ_002306	0	63.0249	0	4	GeneID_102079371	NC_031970.1	-	28514196	28530119	693	annot_exons
novel_circ_002307	26.5396	0	2	0	GeneID_102079371	NC_031970.1	-	28514196	28544892	832	annot_exons
novel_circ_002308	39.8094	0	3	0	GeneID_102079371	NC_031970.1	-	28517992	28544892	480	annot_exons
novel_circ_002309	53.0793	94.5373	4	6	GeneID_102079371	NC_031970.1	-	28529697	28544892	329	annot_exons
novel_circ_002313	26.5396	31.5124	2	2	GeneID_100702546	NC_031970.1	-	28759208	28761647	1149	annot_exons
novel_circ_002316	119.428	0	9	0	GeneID_100700200	NC_031970.1	-	29102802	29138255	756	annot_exons
novel_circ_002318	0	63.0249	0	4	GeneID_100711086	NC_031970.1	-	29402292	29408477	469	annot_exons
novel_circ_002319	0	31.5124	0	2	GeneID_100710288	NC_031970.1	+	29497020	29502455	2427	annot_exons
novel_circ_002320	66.3491	15.7562	5	1	GeneID_100708659	NC_031970.1	+	29703142	29703974	363	annot_exons
novel_circ_002323	26.5396	47.2687	2	3	GeneID_100709904	NC_031970.1	+	29779813	29782987	207	annot_exons
novel_circ_002325	0	31.5124	0	2	GeneID_100709904	NC_031970.1	+	29820568	29824429	294	annot_exons
novel_circ_002327	26.5396	0	2	0	GeneID_100696394	NC_031970.1	-	29851834	29865809	1363	annot_exons
novel_circ_002328	26.5396	0	2	0	GeneID_100711231	NC_031970.1	-	29998403	30002064	600	annot_exons
novel_circ_002329	145.968	110.294	11	7	GeneID_100711231	NC_031970.1	-	29998403	30002067	603	annot_exons
novel_circ_002330	0	47.2687	0	3	GeneID_100711874	NC_031970.1	-	30037924	30039006	206	annot_exons
novel_circ_002333	79.6189	0	6	0	GeneID_100711874	NC_031970.1	-	30051818	30058956	397	annot_exons
novel_circ_002335	0	63.0249	0	4	GeneID_100697192	NC_031970.1	-	30207884	30230696	1530	annot_exons
novel_circ_002336	0	31.5124	0	2	GeneID_100690061	NC_031970.1	-	30320815	30322057	370	annot_exons
novel_circ_002340	0	31.5124	0	2	GeneID_100697987	NC_031970.1	-	30371950	30381500	615	annot_exons
novel_circ_002342	26.5396	0	2	0	GeneID_100690326	NC_031970.1	-	30416024	30418960	1284	annot_exons
novel_circ_002343	119.428	126.05	9	8	GeneID_100690326	NC_031970.1	-	30422228	30440104	1100	annot_exons
novel_circ_002344	26.5396	47.2687	2	3	GeneID_100690326	NC_031970.1	-	30422228	30443776	1142	annot_exons
novel_circ_002345	79.6189	0	6	0	GeneID_100690326	NC_031970.1	-	30422228	30448159	1268	annot_exons
novel_circ_002347	1592.38	630.249	120	40	GeneID_100690326	NC_031970.1	-	30436024	30440104	623	annot_exons
novel_circ_002348	39.8094	47.2687	3	3	GeneID_100690326	NC_031970.1	-	30450504	30451341	384	annot_exons
novel_circ_002351	26.5396	0	2	0	GeneID_100691135	NC_031970.1	-	30588803	30589205	266	annot_exons
novel_circ_002353	0	31.5124	0	2	GeneID_100693381	NC_031970.1	-	31082035	31097258	986	annot_exons
novel_circ_002354	92.8887	31.5124	7	2	GeneID_100693381	NC_031970.1	-	31082035	31114804	1281	annot_exons
novel_circ_002355	53.0793	63.0249	4	4	GeneID_100693381	NC_031970.1	-	31088903	31114804	1159	annot_exons
novel_circ_002356	53.0793	78.7811	4	5	GeneID_100693381	NC_031970.1	-	31114510	31171765	1575	annot_exons
novel_circ_002357	26.5396	0	2	0	GeneID_100693109	NC_031970.1	-	31311262	31313342	716	annot_exons
novel_circ_002358	318.476	393.905	24	25	GeneID_100692566	NC_031970.1	-	31387010	31390445	930	annot_exons
novel_circ_002359	79.6189	31.5124	6	2	GeneID_100692566	NC_031970.1	-	31389674	31390445	491	annot_exons
novel_circ_002360	0	94.5373	0	6	GeneID_100692294	NC_031970.1	-	31479714	31481541	510	annot_exons
novel_circ_002361	13.2698	110.294	1	7	GeneID_100692294	NC_031970.1	-	31494965	31509982	348	annot_exons
novel_circ_002362	0	31.5124	0	2	GeneID_100693467	NC_031970.1	+	31728069	31748405	1019	annot_exons
novel_circ_002363	26.5396	31.5124	2	2	GeneID_100692376	NC_031970.1	-	31819022	31823018	361	annot_exons
novel_circ_002366	92.8887	157.562	7	10	GeneID_102076710	NC_031970.1	+	32046342	32087889	736	annot_exons
novel_circ_002367	26.5396	0	2	0	GeneID_100697172	NC_031970.1	-	32582317	32588487	408	annot_exons
novel_circ_002368	172.508	94.5373	13	6	GeneID_100697172	NC_031970.1	-	32586388	32588487	342	annot_exons
novel_circ_002369	53.0793	15.7562	4	1	GeneID_100697172	NC_031970.1	-	32586388	32598024	1267	annot_exons
novel_circ_002370	451.174	189.075	34	12	GeneID_100697172	NC_031970.1	-	32594684	32598024	925	annot_exons
novel_circ_002371	26.5396	0	2	0	GeneID_100712129	NC_031970.1	+	32688833	32692420	376	annot_exons
novel_circ_002372	53.0793	0	4	0	GeneID_100712129	NC_031970.1	+	32688833	32696700	652	annot_exons
novel_circ_002374	53.0793	15.7562	4	1	GeneID_100691392	NC_031970.1	-	32880016	32884143	1060	annot_exons
novel_circ_002375	39.8094	0	3	0	GeneID_100695319	NC_031970.1	+	33922184	33938113	1225	annot_exons
novel_circ_002376	0	31.5124	0	2	GeneID_100706844	NC_031970.1	-	34130369	34136909	954	annot_exons
novel_circ_002377	53.0793	0	4	0	GeneID_100698899	NC_031971.1	-	125066	125502	357	annot_exons
novel_circ_002378	623.681	315.124	47	20	GeneID_100704127	NC_031971.1	+	717632	724403	428	annot_exons
novel_circ_002380	106.159	31.5124	8	2	GeneID_102083160	NC_031971.1	-	973098	976710	492	annot_exons
novel_circ_002381	53.0793	0	4	0	GeneID_100706447	NC_031971.1	-	1025845	1026442	338	annot_exons
novel_circ_002382	53.0793	173.318	4	11	GeneID_100697374	NC_031971.1	-	1079572	1081276	308	annot_exons
novel_circ_002384	26.5396	0	2	0	GeneID_100696308	NC_031971.1	-	1160016	1164036	709	annot_exons
novel_circ_002386	172.508	173.318	13	11	GeneID_100696308	NC_031971.1	-	1163005	1167098	613	annot_exons
novel_circ_002387	26.5396	0	2	0	GeneID_100710620	NC_031971.1	-	1221746	1224391	1149	annot_exons
novel_circ_002388	53.0793	0	4	0	GeneID_100710620	NC_031971.1	-	1222963	1224391	787	annot_exons
novel_circ_002389	26.5396	0	2	0	GeneID_100695252	NC_031971.1	+	1350451	1356415	583	annot_exons
novel_circ_002390	66.3491	63.0249	5	4	GeneID_100695252	NC_031971.1	+	1361449	1366965	702	annot_exons
novel_circ_002391	0	31.5124	0	2	GeneID_100694188	NC_031971.1	+	1468312	1477465	335	annot_exons
novel_circ_002392	0	31.5124	0	2	GeneID_100708565	NC_031971.1	-	1596162	1599525	1436	annot_exons
novel_circ_002393	13.2698	31.5124	1	2	GeneID_102079800	NC_031971.1	-	1637014	1638341	714	annot_exons
novel_circ_002394	13.2698	63.0249	1	4	GeneID_100690686	NC_031971.1	+	1878028	1884954	647	annot_exons
novel_circ_002399	53.0793	157.562	4	10	GeneID_100690411	NC_031971.1	+	1953307	1960637	660	annot_exons
novel_circ_002400	119.428	283.612	9	18	GeneID_100690143	NC_031971.1	-	2004305	2004614	205	annot_exons
novel_circ_002403	119.428	47.2687	9	3	GeneID_100693377	NC_031971.1	+	2314798	2318665	245	annot_exons
novel_circ_002404	79.6189	78.7811	6	5	GeneID_100693377	NC_031971.1	+	2314798	2343314	1833	annot_exons
novel_circ_002405	145.968	63.0249	11	4	GeneID_100693377	NC_031971.1	+	2314798	2358464	1947	annot_exons
novel_circ_002406	0	78.7811	0	5	GeneID_100693377	NC_031971.1	+	2333216	2340609	71	annot_exons
novel_circ_002407	0	78.7811	0	5	GeneID_100693377	NC_031971.1	+	2340565	2363545	1760	annot_exons
novel_circ_002408	26.5396	0	2	0	GeneID_100693377	NC_031971.1	+	2343186	2368516	445	annot_exons
novel_circ_002410	862.538	1165.96	65	74	GeneID_100693641	NC_031971.1	-	2416865	2417619	573	annot_exons
novel_circ_002412	0	31.5124	0	2	GeneID_100693905	NC_031971.1	+	2805975	2808115	258	annot_exons
novel_circ_002413	39.8094	0	3	0	GeneID_100693905	NC_031971.1	+	2812470	2824659	707	annot_exons
novel_circ_002414	145.968	141.806	11	9	GeneID_100693905	NC_031971.1	+	2860389	2866052	499	annot_exons
novel_circ_002416	278.666	94.5373	21	6	GeneID_100694180	NC_031971.1	-	2996530	2997906	461	annot_exons
novel_circ_002417	0	47.2687	0	3	GeneID_100694180	NC_031971.1	-	2996530	3001125	596	annot_exons
novel_circ_002418	0	31.5124	0	2	GeneID_100694180	NC_031971.1	-	3015290	3049887	1583	annot_exons
novel_circ_002419	0	31.5124	0	2	GeneID_100694180	NC_031971.1	-	3039048	3049887	298	annot_exons
novel_circ_002420	26.5396	0	2	0	GeneID_100694715	NC_031971.1	+	3413705	3432624	1320	annot_exons
novel_circ_002421	199.047	189.075	15	12	GeneID_100694715	NC_031971.1	+	3431444	3432624	1093	annot_exons
novel_circ_002422	26.5396	0	2	0	GeneID_102080519	NC_031971.1	+	3588284	3590627	1969	annot_exons
novel_circ_002423	106.159	0	8	0	GeneID_100711684	NC_031971.1	-	3613649	3618373	471	annot_exons
novel_circ_002424	39.8094	31.5124	3	2	GeneID_100711956	NC_031971.1	-	3745848	3748404	455	annot_exons
novel_circ_002425	185.777	31.5124	14	2	GeneID_100711956	NC_031971.1	-	3758374	3765501	714	annot_exons
novel_circ_002426	66.3491	0	5	0	GeneID_100711956	NC_031971.1	-	3772433	3792645	2561	annot_exons
novel_circ_002427	0	47.2687	0	3	GeneID_100711956	NC_031971.1	-	3779477	3783200	753	annot_exons
novel_circ_002428	0	31.5124	0	2	GeneID_100711956	NC_031971.1	-	3779477	3808657	2480	annot_exons
novel_circ_002430	53.0793	31.5124	4	2	GeneID_100711956	NC_031971.1	-	3790968	3792645	1228	annot_exons
novel_circ_002431	26.5396	0	2	0	GeneID_100689873	NC_031971.1	-	3933207	3934195	186	annot_exons
novel_circ_002432	39.8094	31.5124	3	2	GeneID_100690136	NC_031971.1	+	3937913	3943765	3781	annot_exons
novel_circ_002433	13.2698	31.5124	1	2	GeneID_100690404	NC_031971.1	+	3987247	3994103	1551	annot_exons
novel_circ_002434	66.3491	31.5124	5	2	GeneID_100690404	NC_031971.1	+	3987247	3995875	1885	annot_exons
novel_circ_002435	53.0793	63.0249	4	4	GeneID_100690404	NC_031971.1	+	3992671	3995371	1189	annot_exons
novel_circ_002437	26.5396	0	2	0	GeneID_100701287	NC_031971.1	+	4661739	4665584	550	annot_exons
novel_circ_002440	0	63.0249	0	4	GeneID_100710323	NC_031971.1	-	5081192	5087028	1044	annot_exons
novel_circ_002441	172.508	204.831	13	13	GeneID_100703173	NC_031971.1	-	5143090	5147673	559	annot_exons
novel_circ_002442	0	31.5124	0	2	GeneID_100703173	NC_031971.1	-	5143090	5152638	751	annot_exons
novel_circ_002443	0	31.5124	0	2	GeneID_100703173	NC_031971.1	-	5152447	5175240	952	annot_exons
novel_circ_002444	26.5396	0	2	0	GeneID_100703173	NC_031971.1	-	5162461	5172381	323	annot_exons
novel_circ_002445	132.698	78.7811	10	5	GeneID_100703173	NC_031971.1	-	5172237	5175240	246	annot_exons
novel_circ_002449	26.5396	0	2	0	GeneID_100690655	NC_031971.1	-	5755914	5756385	371	annot_exons
novel_circ_002450	0	31.5124	0	2	GeneID_100704698	NC_031971.1	-	5793885	5795944	1042	annot_exons
novel_circ_002451	1220.82	1276.25	92	81	GeneID_102077828	NC_031971.1	-	5889131	5892512	1611	annot_exons
novel_circ_002456	0	31.5124	0	2	GeneID_100693618	NC_031971.1	+	6382996	6391219	1422	annot_exons
novel_circ_002458	53.0793	0	4	0	GeneID_100693618	NC_031971.1	+	6387687	6391219	1178	annot_exons
novel_circ_002461	0	31.5124	0	2	GeneID_100698514	NC_031971.1	-	8088467	8106385	1316	annot_exons
novel_circ_002462	26.5396	15.7562	2	1	GeneID_100698514	NC_031971.1	-	8098963	8100898	475	annot_exons
novel_circ_002463	26.5396	0	2	0	GeneID_100698514	NC_031971.1	-	8100818	8106385	457	annot_exons
novel_circ_002464	39.8094	63.0249	3	4	GeneID_100698514	NC_031971.1	-	8105911	8111673	965	annot_exons
novel_circ_002467	26.5396	0	2	0	GeneID_100698252	NC_031971.1	-	8252226	8253285	542	annot_exons
novel_circ_002469	39.8094	0	3	0	GeneID_100710168	NC_031971.1	-	8683824	8691667	546	annot_exons
novel_circ_002470	0	31.5124	0	2	GeneID_100707478	NC_031971.1	-	8931365	8932234	562	annot_exons
novel_circ_002471	26.5396	0	2	0	GeneID_102078803	NC_031971.1	-	9080354	9081172	729	annot_exons
novel_circ_002472	0	31.5124	0	2	GeneID_100704547	NC_031971.1	+	9182410	9184923	732	annot_exons
novel_circ_002473	26.5396	15.7562	2	1	GeneID_100694605	NC_031971.1	-	9795297	9797072	631	annot_exons
novel_circ_002475	26.5396	0	2	0	GeneID_100695402	NC_031971.1	-	9863293	9879438	432	annot_exons
novel_circ_002476	0	47.2687	0	3	GeneID_100695402	NC_031971.1	-	9898670	9927275	478	annot_exons
novel_circ_002477	26.5396	0	2	0	GeneID_100695402	NC_031971.1	-	9927172	9955107	257	annot_exons
novel_circ_002479	79.6189	63.0249	6	4	GeneID_100696723	NC_031971.1	+	10341804	10355599	702	annot_exons
novel_circ_002481	26.5396	15.7562	2	1	GeneID_100696723	NC_031971.1	+	10402134	10409008	782	annot_exons
novel_circ_002482	0	63.0249	0	4	GeneID_100696723	NC_031971.1	+	10402137	10409008	779	annot_exons
novel_circ_002484	66.3491	31.5124	5	2	GeneID_102076291	NC_031971.1	+	10642769	10643724	790	annot_exons
novel_circ_002485	26.5396	0	2	0	GeneID_102076291	NC_031971.1	+	10642769	10653208	3603	annot_exons
novel_circ_002486	26.5396	31.5124	2	2	GeneID_100705501	NC_031971.1	+	10740942	10741379	228	annot_exons
novel_circ_002487	53.0793	0	4	0	GeneID_100698858	NC_031971.1	+	10823287	10829753	969	annot_exons
novel_circ_002488	26.5396	0	2	0	GeneID_100698858	NC_031971.1	+	10832090	10835070	1931	annot_exons
novel_circ_002489	26.5396	63.0249	2	4	GeneID_100699125	NC_031971.1	-	10872266	10879623	662	annot_exons
novel_circ_002493	26.5396	15.7562	2	1	GeneID_100699075	NC_031971.1	-	11978535	11983234	639	annot_exons
novel_circ_002494	0	31.5124	0	2	GeneID_100699075	NC_031971.1	-	12011921	12014395	824	annot_exons
novel_circ_002496	79.6189	63.0249	6	4	GeneID_100699878	NC_031971.1	+	12107466	12134510	324	annot_exons
novel_circ_002497	0	94.5373	0	6	GeneID_100699878	NC_031971.1	+	12133208	12134510	241	annot_exons
novel_circ_002498	39.8094	0	3	0	GeneID_100699878	NC_031971.1	+	12147018	12156182	1028	annot_exons
novel_circ_002499	39.8094	110.294	3	7	GeneID_100699878	NC_031971.1	+	12153482	12156182	612	annot_exons
novel_circ_002500	0	31.5124	0	2	GeneID_100699878	NC_031971.1	+	12153482	12177443	942	annot_exons
novel_circ_002501	79.6189	0	6	0	GeneID_100700691	NC_031971.1	+	12380604	12388295	318	annot_exons
novel_circ_002502	13.2698	31.5124	1	2	GeneID_100704623	NC_031971.1	-	12693718	12702269	660	annot_exons
novel_circ_002510	53.0793	63.0249	4	4	GeneID_100704890	NC_031971.1	+	12919552	12965854	312	annot_exons
novel_circ_002511	26.5396	47.2687	2	3	GeneID_100704890	NC_031971.1	+	12919552	12988460	400	annot_exons
novel_circ_002512	0	31.5124	0	2	GeneID_100704890	NC_031971.1	+	12919552	13010482	596	annot_exons
novel_circ_002513	26.5396	47.2687	2	3	GeneID_100694252	NC_031971.1	+	13174085	13176608	464	annot_exons
novel_circ_002514	13.2698	31.5124	1	2	GeneID_100694252	NC_031971.1	+	13175352	13176608	355	annot_exons
novel_circ_002515	1141.2	724.786	86	46	GeneID_100694252	NC_031971.1	+	13188899	13189602	501	annot_exons
novel_circ_002516	26.5396	0	2	0	GeneID_100694252	NC_031971.1	+	13196082	13196579	263	annot_exons
novel_circ_002517	0	63.0249	0	4	GeneID_100694252	NC_031971.1	+	13196431	13196856	274	annot_exons
novel_circ_002519	26.5396	0	2	0	GeneID_100694252	NC_031971.1	+	13201294	13202014	381	annot_exons
novel_circ_002520	26.5396	63.0249	2	4	GeneID_100705952	NC_031971.1	-	13258256	13273065	451	annot_exons
novel_circ_002522	26.5396	0	2	0	GeneID_100706756	NC_031971.1	+	13518187	13528332	307	annot_exons
novel_circ_002523	53.0793	78.7811	4	5	GeneID_100706756	NC_031971.1	+	13542822	13545587	534	annot_exons
novel_circ_002524	92.8887	0	7	0	GeneID_100707026	NC_031971.1	+	13586192	13590391	653	annot_exons
novel_circ_002525	26.5396	0	2	0	GeneID_102077312	NC_031971.1	+	13604207	13608395	1164	annot_exons
novel_circ_002526	0	31.5124	0	2	GeneID_100707824	NC_031971.1	+	13668435	13675076	1362	annot_exons
novel_circ_002528	0	31.5124	0	2	GeneID_100698498	NC_031971.1	-	13910177	13915414	938	annot_exons
novel_circ_002529	119.428	94.5373	9	6	GeneID_100698498	NC_031971.1	-	13915167	13918248	465	annot_exons
novel_circ_002533	92.8887	63.0249	7	4	GeneID_100699311	NC_031971.1	-	14068269	14070101	276	annot_exons
novel_circ_002534	185.777	78.7811	14	5	GeneID_100699311	NC_031971.1	-	14076068	14077875	372	annot_exons
novel_circ_002537	53.0793	0	4	0	GeneID_100709989	NC_031971.1	-	14364112	14373492	2248	annot_exons
novel_circ_002538	39.8094	15.7562	3	1	GeneID_100709989	NC_031971.1	-	14368831	14371430	826	annot_exons
novel_circ_002539	0	31.5124	0	2	GeneID_100710254	NC_031971.1	-	14410582	14412542	650	annot_exons
novel_circ_002541	0	31.5124	0	2	GeneID_100690036	NC_031971.1	+	14598179	14599578	696	annot_exons
novel_circ_002542	278.666	299.368	21	19	GeneID_100690838	NC_031971.1	-	15024468	15026873	237	annot_exons
novel_circ_002543	26.5396	78.7811	2	5	GeneID_100690838	NC_031971.1	-	15024468	15029320	407	annot_exons
novel_circ_002544	252.126	236.343	19	15	GeneID_100690838	NC_031971.1	-	15024468	15032557	536	annot_exons
novel_circ_002545	13.2698	31.5124	1	2	GeneID_100690838	NC_031971.1	-	15024468	15037154	611	annot_exons
novel_circ_002546	265.396	141.806	20	9	GeneID_100690838	NC_031971.1	-	15029151	15032557	299	annot_exons
novel_circ_002548	26.5396	0	2	0	GeneID_100690838	NC_031971.1	-	15032429	15040728	630	annot_exons
novel_circ_002550	39.8094	0	3	0	GeneID_100690838	NC_031971.1	-	15037080	15040728	501	annot_exons
novel_circ_002551	79.6189	31.5124	6	2	GeneID_100690838	NC_031971.1	-	15037080	15092029	1033	annot_exons
novel_circ_002556	159.238	31.5124	12	2	GeneID_100690838	NC_031971.1	-	15091498	15118586	2025	annot_exons
novel_circ_002558	13.2698	94.5373	1	6	GeneID_100702188	NC_031971.1	-	15497263	15500303	872	annot_exons
novel_circ_002561	0	126.05	0	8	GeneID_100693793	NC_031971.1	+	15602963	15609733	533	annot_exons
novel_circ_002562	39.8094	0	3	0	GeneID_100693793	NC_031971.1	+	15602963	15617531	646	annot_exons
novel_circ_002568	92.8887	63.0249	7	4	GeneID_100694065	NC_031971.1	-	15702311	15714814	537	annot_exons
novel_circ_002569	26.5396	94.5373	2	6	GeneID_100703172	NC_031971.1	-	15831369	15835991	526	annot_exons
novel_circ_002575	26.5396	15.7562	2	1	GeneID_100697278	NC_031971.1	+	16401795	16402568	439	annot_exons
novel_circ_002577	0	126.05	0	8	GeneID_100709358	NC_031971.1	-	16423976	16426710	1209	annot_exons
novel_circ_002578	26.5396	63.0249	2	4	GeneID_100708010	NC_031971.1	-	16964936	16970249	328	annot_exons
novel_circ_002579	26.5396	0	2	0	GeneID_100708010	NC_031971.1	-	16964936	16973059	549	annot_exons
novel_circ_002581	0	31.5124	0	2	GeneID_100708010	NC_031971.1	-	16969033	16970249	159	annot_exons
novel_circ_002582	0	31.5124	0	2	GeneID_100708010	NC_031971.1	-	16969033	16973059	380	annot_exons
novel_circ_002583	119.428	31.5124	9	2	GeneID_100708010	NC_031971.1	-	16972839	16985398	1121	annot_exons
novel_circ_002584	13.2698	47.2687	1	3	GeneID_100708010	NC_031971.1	-	17007091	17015562	914	annot_exons
novel_circ_002585	53.0793	78.7811	4	5	GeneID_100708010	NC_031971.1	-	17007091	17055506	1378	annot_exons
novel_circ_002586	26.5396	31.5124	2	2	GeneID_100708010	NC_031971.1	-	17015453	17038632	492	annot_exons
novel_circ_002587	185.777	346.637	14	22	GeneID_100708010	NC_031971.1	-	17015453	17055506	574	annot_exons
novel_circ_002588	172.508	31.5124	13	2	GeneID_100708010	NC_031971.1	-	17031466	17038632	382	annot_exons
novel_circ_002589	1008.51	1292.01	76	82	GeneID_100708010	NC_031971.1	-	17031466	17055506	464	annot_exons
novel_circ_002591	13.2698	189.075	1	12	GeneID_100707475	NC_031971.1	+	17252878	17267270	435	annot_exons
novel_circ_002592	26.5396	47.2687	2	3	GeneID_100707475	NC_031971.1	+	17264431	17267270	288	annot_exons
novel_circ_002593	464.444	472.687	35	30	GeneID_100707475	NC_031971.1	+	17279795	17288224	1269	annot_exons
novel_circ_002594	53.0793	0	4	0	GeneID_100707475	NC_031971.1	+	17298947	17300247	480	annot_exons
novel_circ_002597	1406.6	1228.99	106	78	GeneID_100709169	NC_031971.1	-	17716994	17806649	2115	annot_exons
novel_circ_002598	252.126	126.05	19	8	GeneID_100709169	NC_031971.1	-	17732759	17738409	608	annot_exons
novel_circ_002599	26.5396	15.7562	2	1	GeneID_100709169	NC_031971.1	-	17732759	17806649	2000	annot_exons
novel_circ_002600	26.5396	126.05	2	8	GeneID_100709169	NC_031971.1	-	17736304	17738409	415	annot_exons
novel_circ_002602	92.8887	126.05	7	8	GeneID_100709169	NC_031971.1	-	17783545	17806649	1392	annot_exons
novel_circ_002605	26.5396	31.5124	2	2	GeneID_100709707	NC_031971.1	-	17840498	17842563	1483	annot_exons
novel_circ_002606	0	31.5124	0	2	GeneID_100710771	NC_031971.1	+	18104811	18105781	165	annot_exons
novel_circ_002607	66.3491	15.7562	5	1	GeneID_100710771	NC_031971.1	+	18104811	18106374	238	annot_exons
novel_circ_002608	0	31.5124	0	2	GeneID_100710771	NC_031971.1	+	18125545	18129180	749	annot_exons
novel_circ_002609	26.5396	0	2	0	GeneID_100711842	NC_031971.1	-	18245404	18249634	2121	annot_exons
novel_circ_002610	26.5396	0	2	0	GeneID_100699949	NC_031971.1	-	18404119	18412986	409	annot_exons
novel_circ_002611	0	31.5124	0	2	GeneID_100691557	NC_031971.1	+	18680571	18691683	736	annot_exons
novel_circ_002612	0	47.2687	0	3	GeneID_100691557	NC_031971.1	+	18688385	18690204	334	annot_exons
novel_circ_002614	0	31.5124	0	2	GeneID_100695321	NC_031971.1	+	19164020	19171098	1892	annot_exons
novel_circ_002615	0	898.105	0	57	GeneID_100696206	NC_031971.1	+	19218203	19223681	1215	annot_exons
novel_circ_002616	0	63.0249	0	4	GeneID_100696206	NC_031971.1	+	19231358	19233501	446	annot_exons
novel_circ_002617	39.8094	94.5373	3	6	GeneID_100696206	NC_031971.1	+	19231358	19243842	2247	annot_exons
novel_circ_002618	39.8094	0	3	0	GeneID_100690058	NC_031971.1	-	19599170	19612632	488	annot_exons
novel_circ_002619	0	31.5124	0	2	GeneID_100690058	NC_031971.1	-	19610414	19612632	309	annot_exons
novel_circ_002622	79.6189	141.806	6	9	GeneID_100695867	NC_031971.1	+	19953549	19957631	429	annot_exons
novel_circ_002623	2468.19	2032.55	186	129	GeneID_100695867	NC_031971.1	+	19953549	19964359	558	annot_exons
novel_circ_002624	53.0793	0	4	0	GeneID_100695867	NC_031971.1	+	19975204	19978998	860	annot_exons
novel_circ_002625	26.5396	0	2	0	GeneID_100695599	NC_031971.1	-	19994829	20002006	846	annot_exons
novel_circ_002626	53.0793	0	4	0	GeneID_100710961	NC_031971.1	+	20253103	20278631	303	annot_exons
novel_circ_002627	0	31.5124	0	2	GeneID_100710961	NC_031971.1	+	20253103	20313120	1061	annot_exons
novel_circ_002628	66.3491	0	5	0	GeneID_100710961	NC_031971.1	+	20278436	20284627	750	annot_exons
novel_circ_002629	26.5396	47.2687	2	3	GeneID_100710961	NC_031971.1	+	20282214	20284627	554	annot_exons
novel_circ_002631	504.253	456.93	38	29	GeneID_100710961	NC_031971.1	+	20504131	20516108	554	annot_exons
novel_circ_002632	39.8094	0	3	0	GeneID_100710961	NC_031971.1	+	20504131	20526427	689	annot_exons
novel_circ_002633	0	31.5124	0	2	GeneID_100691566	NC_031971.1	+	21536517	21539791	599	annot_exons
novel_circ_002634	39.8094	31.5124	3	2	GeneID_100699853	NC_031971.1	+	21636537	21643064	1917	annot_exons
novel_circ_002635	79.6189	0	6	0	GeneID_100699853	NC_031971.1	+	21636537	21644199	3052	annot_exons
novel_circ_002636	26.5396	0	2	0	GeneID_100697175	NC_031971.1	-	21953737	21967490	662	annot_exons
novel_circ_002637	26.5396	31.5124	2	2	GeneID_100697175	NC_031971.1	-	21953737	21986138	1668	annot_exons
novel_circ_002638	79.6189	126.05	6	8	GeneID_100697175	NC_031971.1	-	21961634	21986138	1288	annot_exons
novel_circ_002640	145.968	94.5373	11	6	GeneID_100697175	NC_031971.1	-	21967283	21986138	1214	annot_exons
novel_circ_002641	862.538	772.055	65	49	GeneID_100697175	NC_031971.1	-	21983849	21986138	1006	annot_exons
novel_circ_002643	79.6189	31.5124	6	2	GeneID_100697175	NC_031971.1	-	21983849	22005005	1583	annot_exons
novel_circ_002644	79.6189	0	6	0	GeneID_100708189	NC_031971.1	-	22057228	22061770	950	annot_exons
novel_circ_002650	26.5396	0	2	0	GeneID_102082021	NC_031971.1	+	22354272	22355310	545	annot_exons
novel_circ_002651	26.5396	0	2	0	GeneID_100695322	NC_031971.1	+	22397251	22401123	367	annot_exons
novel_circ_002652	26.5396	0	2	0	GeneID_100695055	NC_031971.1	+	22462217	22485997	581	annot_exons
novel_circ_002653	0	31.5124	0	2	GeneID_100695055	NC_031971.1	+	22462217	22491989	1241	annot_exons
novel_circ_002654	26.5396	0	2	0	GeneID_100695055	NC_031971.1	+	22488909	22491989	660	annot_exons
novel_circ_002655	39.8094	31.5124	3	2	GeneID_100705780	NC_031971.1	-	22594103	22618410	2039	annot_exons
novel_circ_002657	26.5396	15.7562	2	1	GeneID_100704365	NC_031971.1	-	22787644	22792824	507	annot_exons
novel_circ_002659	39.8094	0	3	0	GeneID_100702745	NC_031971.1	-	23132798	23134946	339	annot_exons
novel_circ_002660	26.5396	0	2	0	GeneID_100691558	NC_031971.1	-	23572166	23573049	229	annot_exons
novel_circ_002661	39.8094	0	3	0	GeneID_100691287	NC_031971.1	-	23585065	23588154	757	annot_exons
novel_circ_002662	0	31.5124	0	2	GeneID_100691022	NC_031971.1	+	23674003	23682243	1033	annot_exons
novel_circ_002663	145.968	299.368	11	19	GeneID_100712035	NC_031971.1	-	23837482	23839571	714	annot_exons
novel_circ_002664	26.5396	0	2	0	GeneID_100712035	NC_031971.1	-	23837482	23839628	771	annot_exons
novel_circ_002665	159.238	78.7811	12	5	GeneID_100711770	NC_031971.1	-	23908869	23910136	466	annot_exons
novel_circ_002666	238.857	173.318	18	11	GeneID_100711770	NC_031971.1	-	23908869	23917175	650	annot_exons
novel_circ_002667	66.3491	63.0249	5	4	GeneID_100711770	NC_031971.1	-	23908869	23953565	1213	annot_exons
novel_circ_002668	0	31.5124	0	2	GeneID_100711770	NC_031971.1	-	23909810	23917175	511	annot_exons
novel_circ_002669	0	31.5124	0	2	GeneID_100711770	NC_031971.1	-	23916992	23929794	398	annot_exons
novel_circ_002670	0	31.5124	0	2	GeneID_100711770	NC_031971.1	-	23916992	23958688	859	annot_exons
novel_circ_002671	53.0793	31.5124	4	2	GeneID_100711770	NC_031971.1	-	23926617	23953565	563	annot_exons
novel_circ_002672	92.8887	31.5124	7	2	GeneID_100711770	NC_031971.1	-	23940437	23953565	349	annot_exons
novel_circ_002673	636.951	441.174	48	28	GeneID_100711770	NC_031971.1	-	23940437	23958688	461	annot_exons
novel_circ_002674	39.8094	157.562	3	10	GeneID_100711770	NC_031971.1	-	23940437	23982912	541	annot_exons
novel_circ_002675	345.015	31.5124	26	2	GeneID_100711770	NC_031971.1	-	23949966	23953565	218	annot_exons
novel_circ_002676	199.047	63.0249	15	4	GeneID_100711770	NC_031971.1	-	23949966	23958688	330	annot_exons
novel_circ_002677	26.5396	0	2	0	GeneID_100700832	NC_031971.1	-	24414118	24415518	912	annot_exons
novel_circ_002678	0	63.0249	0	4	GeneID_100696390	NC_031971.1	-	24776678	24777340	369	annot_exons
novel_circ_002679	26.5396	0	2	0	GeneID_100696390	NC_031971.1	-	24778374	24779902	642	annot_exons
novel_circ_002680	0	31.5124	0	2	GeneID_100703195	NC_031971.1	-	24826949	24827862	490	annot_exons
novel_circ_002681	26.5396	0	2	0	GeneID_100696126	NC_031971.1	-	24860582	24865392	528	annot_exons
novel_circ_002682	0	31.5124	0	2	GeneID_100696126	NC_031971.1	-	24860582	24888319	1214	annot_exons
novel_circ_002683	305.206	535.711	23	34	GeneID_100696126	NC_031971.1	-	24869428	24878872	590	annot_exons
novel_circ_002684	0	157.562	0	10	GeneID_100696126	NC_031971.1	-	24869428	24888319	686	annot_exons
novel_circ_002685	39.8094	189.075	3	12	GeneID_100696126	NC_031971.1	-	24869487	24878872	531	annot_exons
novel_circ_002686	39.8094	31.5124	3	2	GeneID_100696126	NC_031971.1	-	24877005	24878872	292	annot_exons
novel_circ_002687	53.0793	31.5124	4	2	GeneID_100696126	NC_031971.1	-	24877005	24888319	388	annot_exons
novel_circ_002689	26.5396	63.0249	2	4	GeneID_100695332	NC_031971.1	+	24929397	24933430	1098	annot_exons
novel_circ_002690	0	31.5124	0	2	GeneID_100695332	NC_031971.1	+	24932569	24933430	467	annot_exons
novel_circ_002691	0	63.0249	0	4	GeneID_100700855	NC_031971.1	+	25087615	25088425	443	annot_exons
novel_circ_002692	0	31.5124	0	2	GeneID_100700855	NC_031971.1	+	25087875	25088709	462	annot_exons
novel_circ_002698	26.5396	31.5124	2	2	GeneID_100710860	NC_031971.1	+	26697845	26702743	338	annot_exons
novel_circ_002699	26.5396	141.806	2	9	GeneID_100710860	NC_031971.1	+	26702599	26705391	347	annot_exons
novel_circ_002700	66.3491	31.5124	5	2	GeneID_100710860	NC_031971.1	+	26712250	26719544	941	annot_exons
novel_circ_002701	26.5396	15.7562	2	1	GeneID_100698496	NC_031971.1	-	26839919	26878131	3096	annot_exons
novel_circ_002702	26.5396	94.5373	2	6	GeneID_100698496	NC_031971.1	-	26853831	26878131	2463	annot_exons
novel_circ_002703	66.3491	94.5373	5	6	GeneID_100698496	NC_031971.1	-	26865334	26878131	2220	annot_exons
novel_circ_002704	159.238	189.075	12	12	GeneID_100698496	NC_031971.1	-	26873336	26878131	1941	annot_exons
novel_circ_002709	26.5396	15.7562	2	1	GeneID_100711939	NC_031971.1	-	27169637	27172424	1029	annot_exons
novel_circ_002710	0	31.5124	0	2	GeneID_100712208	NC_031971.1	-	27253119	27266847	732	annot_exons
novel_circ_002711	39.8094	94.5373	3	6	GeneID_100699845	NC_031971.1	-	27452211	27484710	1145	annot_exons
novel_circ_002712	39.8094	31.5124	3	2	GeneID_100699845	NC_031971.1	-	27503328	27526450	622	annot_exons
novel_circ_002713	53.0793	47.2687	4	3	GeneID_100699845	NC_031971.1	-	27540220	27551379	2052	annot_exons
novel_circ_002714	66.3491	47.2687	5	3	GeneID_100690571	NC_031971.1	-	27853789	27858808	619	annot_exons
novel_circ_002716	238.857	456.93	18	29	GeneID_109202484	NC_031971.1	-	27928916	27929947	777	annot_exons
novel_circ_002717	79.6189	78.7811	6	5	GeneID_109202484	NC_031971.1	-	27928916	27948584	855	annot_exons
novel_circ_002719	0	63.0249	0	4	GeneID_100534475	NC_031971.1	-	28085951	28089026	534	annot_exons
novel_circ_002720	26.5396	94.5373	2	6	GeneID_100701744	NC_031971.1	-	28155079	28156244	295	annot_exons
novel_circ_002723	0	31.5124	0	2	GeneID_100702819	NC_031971.1	+	28372854	28373420	383	annot_exons
novel_circ_002725	0	63.0249	0	4	GeneID_100695045	NC_031971.1	+	28777083	28785757	818	annot_exons
novel_circ_002726	92.8887	31.5124	7	2	GeneID_100695045	NC_031971.1	+	28782326	28783753	547	annot_exons
novel_circ_002727	26.5396	47.2687	2	3	GeneID_100695045	NC_031971.1	+	28782326	28785757	756	annot_exons
novel_circ_002729	13.2698	47.2687	1	3	GeneID_100703900	NC_031971.1	+	29060299	29073020	450	annot_exons
novel_circ_002730	66.3491	78.7811	5	5	GeneID_100703900	NC_031971.1	+	29060299	29081072	1861	annot_exons
novel_circ_002731	172.508	15.7562	13	1	GeneID_100703900	NC_031971.1	+	29060299	29082470	2244	annot_exons
novel_circ_002732	66.3491	47.2687	5	3	GeneID_100703900	NC_031971.1	+	29078102	29081072	370	annot_exons
novel_circ_002734	0	31.5124	0	2	GeneID_100706033	NC_031971.1	+	29286968	29288296	807	annot_exons
novel_circ_002735	0	31.5124	0	2	GeneID_100706033	NC_031971.1	+	29286968	29293370	1097	annot_exons
novel_circ_002736	39.8094	0	3	0	GeneID_100696633	NC_031971.1	+	29328850	29332320	750	annot_exons
novel_circ_002737	26.5396	0	2	0	GeneID_100696633	NC_031971.1	+	29330881	29332320	571	annot_exons
novel_circ_002738	26.5396	0	2	0	GeneID_100704019	NC_031971.1	-	29518040	29547057	3670	annot_exons
novel_circ_002739	623.681	803.567	47	51	GeneID_100704019	NC_031971.1	-	29535019	29540712	1333	annot_exons
novel_circ_002740	0	47.2687	0	3	GeneID_100704019	NC_031971.1	-	29535019	29544977	1493	annot_exons
novel_circ_002743	0	78.7811	0	5	GeneID_100701042	NC_031971.1	+	30023518	30029202	412	annot_exons
novel_circ_002744	13.2698	31.5124	1	2	GeneID_100701042	NC_031971.1	+	30023518	30064908	546	annot_exons
novel_circ_002745	66.3491	31.5124	5	2	GeneID_100701042	NC_031971.1	+	30026213	30064908	389	annot_exons
novel_circ_002747	0	47.2687	0	3	GeneID_100701042	NC_031971.1	+	30129152	30140467	635	annot_exons
novel_circ_002748	39.8094	0	3	0	GeneID_100701042	NC_031971.1	+	30129152	30160733	1955	annot_exons
novel_circ_002749	26.5396	94.5373	2	6	GeneID_100701042	NC_031971.1	+	30129152	30164353	2150	annot_exons
novel_circ_002750	0	47.2687	0	3	GeneID_100701042	NC_031971.1	+	30142548	30160733	1221	annot_exons
novel_circ_002751	79.6189	63.0249	6	4	GeneID_100701042	NC_031971.1	+	30175997	30179232	470	annot_exons
novel_circ_002753	119.428	63.0249	9	4	GeneID_100698622	NC_031971.1	-	30412316	30414635	349	annot_exons
novel_circ_002754	26.5396	0	2	0	GeneID_100698622	NC_031971.1	-	30415328	30417953	356	annot_exons
novel_circ_002755	119.428	47.2687	9	3	GeneID_100698622	NC_031971.1	-	30427674	30433859	926	annot_exons
novel_circ_002756	26.5396	31.5124	2	2	GeneID_100698622	NC_031971.1	-	30431564	30433859	608	annot_exons
novel_circ_002757	26.5396	0	2	0	GeneID_100698622	NC_031971.1	-	30488032	30488508	384	annot_exons
novel_circ_002758	26.5396	0	2	0	GeneID_100698622	NC_031971.1	-	30488032	30514567	657	annot_exons
novel_circ_002760	39.8094	31.5124	3	2	GeneID_100698358	NC_031971.1	+	30575893	30577722	451	annot_exons
novel_circ_002762	26.5396	0	2	0	GeneID_100694555	NC_031971.1	-	31006924	31008481	624	annot_exons
novel_circ_002763	0	63.0249	0	4	GeneID_100694555	NC_031971.1	-	31006924	31030943	1257	annot_exons
novel_circ_002764	26.5396	0	2	0	GeneID_100694555	NC_031971.1	-	31007030	31008481	518	annot_exons
novel_circ_002765	371.555	488.443	28	31	GeneID_100694555	NC_031971.1	-	31017533	31030943	633	annot_exons
novel_circ_002766	53.0793	110.294	4	7	GeneID_100697998	NC_031971.1	+	31169413	31169824	333	annot_exons
novel_circ_002767	26.5396	236.343	2	15	GeneID_100697998	NC_031971.1	+	31173261	31174145	379	annot_exons
novel_circ_002769	53.0793	15.7562	4	1	GeneID_100697468	NC_031971.1	+	31344771	31350038	420	annot_exons
novel_circ_002770	0	31.5124	0	2	GeneID_100697202	NC_031971.1	-	31403747	31409801	1193	annot_exons
novel_circ_002771	371.555	535.711	28	34	GeneID_100697202	NC_031971.1	-	31405583	31409801	1016	annot_exons
novel_circ_002772	66.3491	189.075	5	12	GeneID_100697202	NC_031971.1	-	31408869	31409801	849	annot_exons
novel_circ_002775	53.0793	31.5124	4	2	GeneID_100697375	NC_031971.1	+	32005201	32012734	1240	annot_exons
novel_circ_002776	92.8887	110.294	7	7	GeneID_100697375	NC_031971.1	+	32008018	32012474	543	annot_exons
novel_circ_002777	26.5396	0	2	0	GeneID_100690414	NC_031971.1	+	32211302	32216075	1012	annot_exons
novel_circ_002778	26.5396	31.5124	2	2	GeneID_100690414	NC_031971.1	+	32215083	32218582	991	annot_exons
novel_circ_002779	0	31.5124	0	2	GeneID_100694190	NC_031971.1	-	32516058	32520115	869	annot_exons
novel_circ_002780	159.238	110.294	12	7	GeneID_100692926	NC_031971.1	-	33953187	33954428	376	annot_exons
novel_circ_002784	39.8094	63.0249	3	4	GeneID_100697633	NC_031971.1	-	35585294	35586731	633	annot_exons
novel_circ_002785	0	31.5124	0	2	GeneID_100698167	NC_031971.1	-	35643601	35652822	2437	annot_exons
novel_circ_002786	53.0793	0	4	0	GeneID_102083256	NC_031971.1	-	35682182	35685765	1179	annot_exons
novel_circ_002787	0	63.0249	0	4	GeneID_100710081	NC_031971.1	+	36188221	36199990	1795	annot_exons
novel_circ_002791	477.713	409.662	36	26	GeneID_100709811	NC_031971.1	-	36258919	36262272	438	annot_exons
novel_circ_002793	0	47.2687	0	3	GeneID_100709811	NC_031971.1	-	36266246	36279334	723	annot_exons
novel_circ_002794	13.2698	31.5124	1	2	GeneID_100709811	NC_031971.1	-	36268538	36279334	687	annot_exons
novel_circ_002795	79.6189	47.2687	6	3	GeneID_100709811	NC_031971.1	-	36268538	36301924	2305	annot_exons
novel_circ_002796	66.3491	31.5124	5	2	GeneID_100709811	NC_031971.1	-	36270024	36301924	2191	annot_exons
novel_circ_002797	0	31.5124	0	2	GeneID_100709811	NC_031971.1	-	36275051	36279334	315	annot_exons
novel_circ_002799	371.555	173.318	28	11	GeneID_100709811	NC_031971.1	-	36289841	36301924	1521	annot_exons
novel_circ_002800	13.2698	31.5124	1	2	GeneID_100709811	NC_031971.1	-	36291229	36361927	4746	annot_exons
novel_circ_002801	0	31.5124	0	2	GeneID_100709811	NC_031971.1	-	36291557	36299545	476	annot_exons
novel_circ_002802	0	31.5124	0	2	GeneID_100709811	NC_031971.1	-	36299018	36301924	961	annot_exons
novel_circ_002803	159.238	141.806	12	9	GeneID_100709811	NC_031971.1	-	36311059	36328126	2224	annot_exons
novel_circ_002804	0	31.5124	0	2	GeneID_100709811	NC_031971.1	-	36311059	36405681	3753	annot_exons
novel_circ_002805	0	31.5124	0	2	GeneID_100709811	NC_031971.1	-	36312643	36318248	1176	annot_exons
novel_circ_002806	26.5396	63.0249	2	4	GeneID_100709811	NC_031971.1	-	36330478	36331768	556	annot_exons
novel_circ_002816	0	31.5124	0	2	GeneID_100709376	NC_031971.1	+	37011167	37012331	671	annot_exons
novel_circ_002817	119.428	126.05	9	8	GeneID_100709376	NC_031971.1	+	37011167	37015950	3435	annot_exons
novel_circ_002818	26.5396	0	2	0	GeneID_100709644	NC_031971.1	-	37197523	37200521	850	annot_exons
novel_circ_002819	0	31.5124	0	2	GeneID_106096648	NC_031971.1	-	37331564	37344621	856	annot_exons
novel_circ_002820	53.0793	0	4	0	GeneID_106096648	NC_031971.1	-	37331564	37357245	1654	annot_exons
novel_circ_002821	265.396	31.5124	20	2	GeneID_106096648	NC_031971.1	-	37344488	37350752	396	annot_exons
novel_circ_002822	26.5396	0	2	0	GeneID_106096648	NC_031971.1	-	37355647	37356593	216	annot_exons
novel_circ_002823	26.5396	63.0249	2	4	GeneID_106096648	NC_031971.1	-	37404902	37405720	738	annot_exons
novel_circ_002824	66.3491	110.294	5	7	GeneID_100708132	NC_031971.1	+	37936572	37940879	630	annot_exons
novel_circ_002825	66.3491	157.562	5	10	GeneID_100709388	NC_031971.1	+	38073825	38080402	1782	annot_exons
novel_circ_002828	119.428	126.05	9	8	GeneID_102079284	NC_031971.1	+	39466303	39469092	1070	annot_exons
novel_circ_002829	0	31.5124	0	2	GeneID_102079284	NC_031971.1	+	39476848	39481235	438	annot_exons
novel_circ_002830	39.8094	0	3	0	GeneID_102079284	NC_031971.1	+	39486400	39486949	413	annot_exons
novel_circ_002831	79.6189	0	6	0	GeneID_100705619	NC_031971.1	+	39727922	39736130	556	annot_exons
novel_circ_002832	79.6189	15.7562	6	1	GeneID_100705354	NC_031971.1	-	39835365	39836586	216	annot_exons
novel_circ_002836	13.2698	47.2687	1	3	GeneID_100711411	NC_031971.1	+	40184986	40186349	309	annot_exons
novel_circ_002837	0	31.5124	0	2	GeneID_100711411	NC_031971.1	+	40184986	40190155	1060	annot_exons
novel_circ_002838	0	31.5124	0	2	GeneID_100701852	NC_031971.1	+	40224223	40227960	1059	annot_exons
novel_circ_002839	0	47.2687	0	3	GeneID_100701852	NC_031971.1	+	40224223	40229523	1287	annot_exons
novel_circ_002840	26.5396	63.0249	2	4	GeneID_100704548	NC_031971.1	-	40311869	40313574	546	annot_exons
novel_circ_002842	451.174	315.124	34	20	GeneID_100700222	NC_031971.1	+	40471572	40473471	525	annot_exons
novel_circ_002843	0	31.5124	0	2	GeneID_100711262	NC_031971.1	-	41026210	41027198	300	annot_exons
novel_circ_002844	66.3491	15.7562	5	1	GeneID_100695682	NC_031971.1	-	41074871	41086087	1268	annot_exons
novel_circ_002845	106.159	78.7811	8	5	GeneID_100695682	NC_031971.1	-	41084578	41086087	494	annot_exons
novel_circ_002846	0	31.5124	0	2	GeneID_100695158	NC_031971.1	+	41265753	41270825	554	annot_exons
novel_circ_002847	0	31.5124	0	2	GeneID_100695158	NC_031971.1	+	41270502	41272873	583	annot_exons
novel_circ_002848	636.951	567.224	48	36	GeneID_102082064	NC_031971.1	+	41294516	41301117	627	annot_exons
novel_circ_002849	66.3491	0	5	0	GeneID_102082064	NC_031971.1	+	41294516	41313604	879	annot_exons
novel_circ_002850	623.681	551.468	47	35	GeneID_102082064	NC_031971.1	+	41294516	41325423	2061	annot_exons
novel_circ_002851	0	94.5373	0	6	GeneID_102082064	NC_031971.1	+	41294516	41334459	2393	annot_exons
novel_circ_002852	13.2698	31.5124	1	2	GeneID_102082064	NC_031971.1	+	41312600	41325423	1341	annot_exons
novel_circ_002853	0	94.5373	0	6	GeneID_102082064	NC_031971.1	+	41320276	41325423	1182	annot_exons
novel_circ_002854	53.0793	0	4	0	GeneID_102082064	NC_031971.1	+	41322611	41325423	696	annot_exons
novel_circ_002855	119.428	220.587	9	14	GeneID_100534587	NC_031971.1	-	41430005	41442150	547	annot_exons
novel_circ_002857	92.8887	47.2687	7	3	GeneID_100534587	NC_031971.1	-	41430005	41464902	795	annot_exons
novel_circ_002858	0	31.5124	0	2	GeneID_100534587	NC_031971.1	-	41430005	41516659	2603	annot_exons
novel_circ_002859	26.5396	0	2	0	GeneID_100534587	NC_031971.1	-	41434862	41516659	2421	annot_exons
novel_circ_002862	53.0793	94.5373	4	6	GeneID_100534587	NC_031971.1	-	41464655	41485962	818	annot_exons
novel_circ_002863	39.8094	0	3	0	GeneID_100534587	NC_031971.1	-	41481204	41516659	1808	annot_exons
novel_circ_002864	66.3491	47.2687	5	3	GeneID_100534587	NC_031971.1	-	41489720	41516659	1238	annot_exons
novel_circ_002865	132.698	31.5124	10	2	GeneID_100534587	NC_031971.1	-	41490581	41495993	445	annot_exons
novel_circ_002867	252.126	299.368	19	19	GeneID_100534587	NC_031971.1	-	41495096	41497559	594	annot_exons
novel_circ_002868	490.983	519.955	37	33	GeneID_100534587	NC_031971.1	-	41495096	41513339	669	annot_exons
novel_circ_002869	185.777	299.368	14	19	GeneID_100534587	NC_031971.1	-	41495096	41516659	1031	annot_exons
novel_circ_002870	26.5396	47.2687	2	3	GeneID_100534587	NC_031971.1	-	41513265	41516659	437	annot_exons
novel_circ_002873	0	31.5124	0	2	GeneID_100694359	NC_031971.1	-	41558225	41576703	599	annot_exons
novel_circ_002874	782.919	1102.94	59	70	GeneID_100694359	NC_031971.1	-	41558225	41579421	682	annot_exons
novel_circ_002875	0	63.0249	0	4	GeneID_100694359	NC_031971.1	-	41558225	41585045	977	annot_exons
novel_circ_002876	0	31.5124	0	2	GeneID_100694359	NC_031971.1	-	41558225	41600696	1214	annot_exons
novel_circ_002878	172.508	31.5124	13	2	GeneID_100694359	NC_031971.1	-	41568466	41579421	523	annot_exons
novel_circ_002879	53.0793	0	4	0	GeneID_100694359	NC_031971.1	-	41576566	41579421	221	annot_exons
novel_circ_002880	265.396	252.1	20	16	GeneID_100694359	NC_031971.1	-	41576566	41585045	516	annot_exons
novel_circ_002881	331.745	252.1	25	16	GeneID_100694359	NC_031971.1	-	41576566	41594221	623	annot_exons
novel_circ_002883	238.857	362.393	18	23	GeneID_100694359	NC_031971.1	-	41576566	41600696	753	annot_exons
novel_circ_002885	0	31.5124	0	2	GeneID_100694359	NC_031971.1	-	41584329	41600696	532	annot_exons
novel_circ_002886	26.5396	31.5124	2	2	GeneID_100698965	NC_031971.1	-	41808522	41812964	588	annot_exons
novel_circ_002887	92.8887	0	7	0	GeneID_100699502	NC_031971.1	-	41869773	41901714	2171	annot_exons
novel_circ_002888	0	78.7811	0	5	GeneID_100699502	NC_031971.1	-	41882239	41883245	603	annot_exons
novel_circ_002889	79.6189	63.0249	6	4	GeneID_100699502	NC_031971.1	-	41897016	41901714	428	annot_exons
novel_circ_002890	0	31.5124	0	2	GeneID_100699502	NC_031971.1	-	41931726	41935562	412	annot_exons
novel_circ_002891	0	31.5124	0	2	GeneID_100699502	NC_031971.1	-	41931726	41941732	541	annot_exons
novel_circ_002892	53.0793	0	4	0	GeneID_100699502	NC_031971.1	-	41931726	41948074	1161	annot_exons
novel_circ_002893	53.0793	63.0249	4	4	GeneID_100699502	NC_031971.1	-	41943127	41948074	487	annot_exons
novel_circ_002894	66.3491	94.5373	5	6	GeneID_100699502	NC_031971.1	-	41985748	42016040	507	annot_exons
novel_circ_002896	145.968	47.2687	11	3	GeneID_100699502	NC_031971.1	-	42097431	42101739	471	annot_exons
novel_circ_002897	915.617	882.348	69	56	GeneID_100699502	NC_031971.1	-	42097431	42110228	594	annot_exons
novel_circ_002898	119.428	0	9	0	GeneID_100699502	NC_031971.1	-	42097431	42153587	670	annot_exons
novel_circ_002901	39.8094	0	3	0	GeneID_100701413	NC_031971.1	-	43283914	43284331	286	annot_exons
novel_circ_002902	39.8094	0	3	0	GeneID_106097667	NC_031971.1	-	43327445	43328842	447	annot_exons
novel_circ_002905	2229.33	2237.38	168	142	GeneID_100699241	NC_031971.1	+	43569635	43570329	340	annot_exons
novel_circ_002906	0	47.2687	0	3	GeneID_100698440	NC_031971.1	-	43670420	43671575	459	annot_exons
novel_circ_002907	0	31.5124	0	2	GeneID_100693264	NC_031972.1	+	79470	84353	1322	annot_exons
novel_circ_002910	172.508	94.5373	13	6	GeneID_100704536	NC_031972.1	-	233244	244001	1274	annot_exons
novel_circ_002911	610.411	740.542	46	47	GeneID_100704536	NC_031972.1	-	239962	244001	576	annot_exons
novel_circ_002913	26.5396	0	2	0	GeneID_102077756	NC_031972.1	-	459006	464895	457	annot_exons
novel_circ_002914	0	31.5124	0	2	GeneID_102077756	NC_031972.1	-	551165	554678	298	annot_exons
novel_circ_002915	0	63.0249	0	4	GeneID_102077756	NC_031972.1	-	551165	574448	603	annot_exons
novel_circ_002916	0	31.5124	0	2	GeneID_100703181	NC_031972.1	+	725955	744674	724	annot_exons
novel_circ_002917	53.0793	15.7562	4	1	GeneID_100703181	NC_031972.1	+	725955	754559	861	annot_exons
novel_circ_002919	119.428	141.806	9	9	GeneID_100703181	NC_031972.1	+	732869	744674	640	annot_exons
novel_circ_002920	437.904	393.905	33	25	GeneID_100703181	NC_031972.1	+	732869	754559	777	annot_exons
novel_circ_002921	145.968	0	11	0	GeneID_100703181	NC_031972.1	+	732869	775241	874	annot_exons
novel_circ_002924	0	31.5124	0	2	GeneID_100690845	NC_031972.1	+	998767	1039203	1554	annot_exons
novel_circ_002925	278.666	126.05	21	8	GeneID_100690845	NC_031972.1	+	1034022	1039203	808	annot_exons
novel_circ_002926	26.5396	47.2687	2	3	GeneID_100690845	NC_031972.1	+	1053474	1056883	729	annot_exons
novel_circ_002927	0	47.2687	0	3	GeneID_100690845	NC_031972.1	+	1053474	1064887	1932	annot_exons
novel_circ_002928	0	31.5124	0	2	GeneID_100690845	NC_031972.1	+	1056328	1070112	1933	annot_exons
novel_circ_002930	0	31.5124	0	2	GeneID_100690845	NC_031972.1	+	1069720	1070112	291	annot_exons
novel_circ_002931	26.5396	0	2	0	GeneID_100709714	NC_031972.1	-	1276433	1277445	306	annot_exons
novel_circ_002932	66.3491	0	5	0	GeneID_100701295	NC_031972.1	-	1490496	1493173	682	annot_exons
novel_circ_002933	0	31.5124	0	2	GeneID_100701295	NC_031972.1	-	1490496	1505723	1351	annot_exons
novel_circ_002934	225.587	252.1	17	16	GeneID_100701295	NC_031972.1	-	1500689	1505723	654	annot_exons
novel_circ_002935	26.5396	0	2	0	GeneID_100701295	NC_031972.1	-	1500689	1517280	1027	annot_exons
novel_circ_002936	384.825	409.662	29	26	GeneID_100701295	NC_031972.1	-	1502472	1505723	468	annot_exons
novel_circ_002937	53.0793	63.0249	4	4	GeneID_100701295	NC_031972.1	-	1502472	1510948	636	annot_exons
novel_circ_002938	623.681	267.856	47	17	GeneID_100701295	NC_031972.1	-	1516670	1521047	321	annot_exons
novel_circ_002940	39.8094	47.2687	3	3	GeneID_100699939	NC_031972.1	-	1968144	1972275	574	annot_exons
novel_circ_002941	26.5396	0	2	0	GeneID_100699939	NC_031972.1	-	1968144	1975044	666	annot_exons
novel_circ_002942	0	63.0249	0	4	GeneID_100706938	NC_031972.1	-	2001521	2003446	339	annot_exons
novel_circ_002946	26.5396	0	2	0	GeneID_100698334	NC_031972.1	+	2165144	2169607	1546	annot_exons
novel_circ_002949	0	63.0249	0	4	GeneID_100695937	NC_031972.1	+	2641226	2647810	1464	annot_exons
novel_circ_002950	26.5396	0	2	0	GeneID_100695937	NC_031972.1	+	2642344	2647810	1183	annot_exons
novel_circ_002951	106.159	0	8	0	GeneID_100695409	NC_031972.1	+	2697431	2703706	282	annot_exons
novel_circ_002952	39.8094	47.2687	3	3	GeneID_100695409	NC_031972.1	+	2761277	2761656	299	annot_exons
novel_circ_002953	0	31.5124	0	2	GeneID_100695146	NC_031972.1	-	2869193	2872185	825	annot_exons
novel_circ_002954	106.159	126.05	8	8	GeneID_100707495	NC_031972.1	+	3134872	3137211	382	annot_exons
novel_circ_002955	13.2698	31.5124	1	2	GeneID_100697368	NC_031972.1	+	3310980	3324716	1176	annot_exons
novel_circ_002956	66.3491	110.294	5	7	GeneID_100711415	NC_031972.1	+	3433427	3435752	322	annot_exons
novel_circ_002957	0	31.5124	0	2	GeneID_100696828	NC_031972.1	-	3550404	3555754	1195	annot_exons
novel_circ_002958	79.6189	63.0249	6	4	GeneID_100694717	NC_031972.1	-	3739705	3741804	580	annot_exons
novel_circ_002959	66.3491	315.124	5	20	GeneID_100694717	NC_031972.1	-	3739721	3741804	564	annot_exons
novel_circ_002960	0	31.5124	0	2	GeneID_100694717	NC_031972.1	-	3741286	3741804	364	annot_exons
novel_circ_002961	0	31.5124	0	2	GeneID_100694717	NC_031972.1	-	3741286	3748638	1087	annot_exons
novel_circ_002962	0	31.5124	0	2	GeneID_100702486	NC_031972.1	+	3838461	3843852	945	annot_exons
novel_circ_002963	26.5396	0	2	0	GeneID_100701133	NC_031972.1	-	4080623	4116807	1602	annot_exons
novel_circ_002964	53.0793	0	4	0	GeneID_100701133	NC_031972.1	-	4103461	4109663	297	annot_exons
novel_circ_002965	318.476	220.587	24	14	GeneID_100698789	NC_031972.1	+	4291403	4293045	506	annot_exons
novel_circ_002968	26.5396	0	2	0	GeneID_100692021	NC_031972.1	-	4458747	4471491	681	annot_exons
novel_circ_002969	238.857	110.294	18	7	GeneID_100691750	NC_031972.1	-	4503295	4505183	761	annot_exons
novel_circ_002970	26.5396	0	2	0	GeneID_100690138	NC_031972.1	+	4624725	4643926	1988	annot_exons
novel_circ_002971	0	78.7811	0	5	GeneID_100690138	NC_031972.1	+	4627103	4635224	1187	annot_exons
novel_circ_002972	66.3491	0	5	0	GeneID_100690138	NC_031972.1	+	4630500	4651091	701	annot_exons
novel_circ_002973	26.5396	0	2	0	GeneID_100690138	NC_031972.1	+	4634662	4643926	489	annot_exons
novel_circ_002974	0	94.5373	0	6	GeneID_100690138	NC_031972.1	+	4634662	4651091	596	annot_exons
novel_circ_002977	26.5396	0	2	0	GeneID_100697902	NC_031972.1	+	4716682	4716993	226	annot_exons
novel_circ_002979	132.698	126.05	10	8	GeneID_100695950	NC_031972.1	+	4865284	4872477	552	annot_exons
novel_circ_002980	0	63.0249	0	4	GeneID_100702992	NC_031972.1	+	4985228	4989961	1387	annot_exons
novel_circ_002981	79.6189	0	6	0	GeneID_100695683	NC_031972.1	+	5005314	5007100	463	annot_exons
novel_circ_002982	26.5396	0	2	0	GeneID_100710076	NC_031972.1	+	5055577	5059904	1568	annot_exons
novel_circ_002983	26.5396	0	2	0	GeneID_100710076	NC_031972.1	+	5060857	5061209	280	annot_exons
novel_circ_002984	172.508	94.5373	13	6	GeneID_100710076	NC_031972.1	+	5080680	5083339	686	annot_exons
novel_circ_002985	0	31.5124	0	2	GeneID_100694890	NC_031972.1	+	5163791	5164600	492	annot_exons
novel_circ_002986	39.8094	0	3	0	GeneID_100694890	NC_031972.1	+	5163791	5166726	572	annot_exons
novel_circ_002987	0	47.2687	0	3	GeneID_100694629	NC_031972.1	+	5243159	5244679	657	annot_exons
novel_circ_002988	0	47.2687	0	3	GeneID_100694361	NC_031972.1	+	5267961	5270021	488	annot_exons
novel_circ_002989	145.968	78.7811	11	5	GeneID_100694089	NC_031972.1	+	5285313	5287067	449	annot_exons
novel_circ_002991	172.508	189.075	13	12	GeneID_100694089	NC_031972.1	+	5285313	5289970	546	annot_exons
novel_circ_002992	26.5396	78.7811	2	5	GeneID_100694089	NC_031972.1	+	5285313	5300115	1428	annot_exons
novel_circ_002993	26.5396	31.5124	2	2	GeneID_100694089	NC_031972.1	+	5289874	5300115	979	annot_exons
novel_circ_002995	0	31.5124	0	2	GeneID_100707336	NC_031972.1	-	5400929	5416690	571	annot_exons
novel_circ_002996	0	31.5124	0	2	GeneID_100707336	NC_031972.1	-	5400929	5426876	944	annot_exons
novel_circ_002997	358.285	252.1	27	16	GeneID_100707336	NC_031972.1	-	5400929	5426879	947	annot_exons
novel_circ_002998	26.5396	0	2	0	GeneID_100707336	NC_031972.1	-	5400929	5441989	1213	annot_exons
novel_circ_002999	26.5396	236.343	2	15	GeneID_100707336	NC_031972.1	-	5416490	5426879	577	annot_exons
novel_circ_003000	132.698	63.0249	10	4	GeneID_100707336	NC_031972.1	-	5416490	5441989	843	annot_exons
novel_circ_003001	0	63.0249	0	4	GeneID_100707336	NC_031972.1	-	5416490	5448073	2223	annot_exons
novel_circ_003002	0	173.318	0	11	GeneID_100707336	NC_031972.1	-	5425672	5441989	642	annot_exons
novel_circ_003007	26.5396	0	2	0	GeneID_100705735	NC_031972.1	+	5553394	5558388	651	annot_exons
novel_circ_003008	26.5396	0	2	0	GeneID_100705473	NC_031972.1	+	5589091	5601173	1716	annot_exons
novel_circ_003009	66.3491	31.5124	5	2	GeneID_100703592	NC_031972.1	-	5945163	5946005	280	annot_exons
novel_circ_003010	26.5396	31.5124	2	2	GeneID_100703592	NC_031972.1	-	5945163	5962778	908	annot_exons
novel_circ_003011	79.6189	0	6	0	GeneID_100703592	NC_031972.1	-	5955236	5962778	300	annot_exons
novel_circ_003012	119.428	157.562	9	10	GeneID_100703592	NC_031972.1	-	5991670	6001297	394	annot_exons
novel_circ_003013	66.3491	110.294	5	7	GeneID_100703592	NC_031972.1	-	5991670	6008404	445	annot_exons
novel_circ_003014	159.238	126.05	12	8	GeneID_100703592	NC_031972.1	-	5991670	6014804	666	annot_exons
novel_circ_003015	0	63.0249	0	4	GeneID_100703592	NC_031972.1	-	5999631	6025653	675	annot_exons
novel_circ_003016	0	31.5124	0	2	GeneID_100701979	NC_031972.1	-	6200343	6201360	432	annot_exons
novel_circ_003020	39.8094	63.0249	3	4	GeneID_100708951	NC_031972.1	-	6253357	6266971	1680	annot_exons
novel_circ_003021	26.5396	0	2	0	GeneID_100700885	NC_031972.1	+	6384058	6393243	1034	annot_exons
novel_circ_003026	26.5396	15.7562	2	1	GeneID_100700073	NC_031972.1	-	6583445	6606767	3140	annot_exons
novel_circ_003027	39.8094	0	3	0	GeneID_100700073	NC_031972.1	-	6587471	6594918	392	annot_exons
novel_circ_003028	13.2698	47.2687	1	3	GeneID_100700073	NC_031972.1	-	6621215	6634448	783	annot_exons
novel_circ_003029	106.159	47.2687	8	3	GeneID_100706797	NC_031972.1	+	6892477	6895087	302	annot_exons
novel_circ_003031	39.8094	0	3	0	GeneID_100699265	NC_031972.1	+	6925584	6928132	462	annot_exons
novel_circ_003033	26.5396	15.7562	2	1	GeneID_100706525	NC_031972.1	+	6960028	6960977	508	annot_exons
novel_circ_003035	0	31.5124	0	2	GeneID_100705560	NC_031972.1	-	7136369	7137728	439	annot_exons
novel_circ_003036	26.5396	31.5124	2	2	GeneID_100705560	NC_031972.1	-	7136369	7145621	768	annot_exons
novel_circ_003037	26.5396	0	2	0	GeneID_100705560	NC_031972.1	-	7143605	7145621	329	annot_exons
novel_circ_003038	185.777	94.5373	14	6	GeneID_100704048	NC_031972.1	+	7299328	7301848	1056	annot_exons
novel_circ_003039	53.0793	63.0249	4	4	GeneID_100704048	NC_031972.1	+	7299819	7301848	820	annot_exons
novel_circ_003040	39.8094	94.5373	3	6	GeneID_100704048	NC_031972.1	+	7300996	7301848	475	annot_exons
novel_circ_003043	53.0793	63.0249	4	4	GeneID_100703404	NC_031972.1	-	7428059	7441688	1505	annot_exons
novel_circ_003045	13.2698	63.0249	1	4	GeneID_100702242	NC_031972.1	-	7636397	7637193	295	annot_exons
novel_circ_003046	0	31.5124	0	2	GeneID_100702242	NC_031972.1	-	7637047	7642188	1091	annot_exons
novel_circ_003047	79.6189	0	6	0	GeneID_100702242	NC_031972.1	-	7643672	7644348	243	annot_exons
novel_circ_003048	79.6189	0	6	0	GeneID_100702242	NC_031972.1	-	7646684	7648137	414	annot_exons
novel_circ_003049	39.8094	31.5124	3	2	GeneID_100695537	NC_031972.1	+	7747799	7749899	410	annot_exons
novel_circ_003050	0	31.5124	0	2	GeneID_100693937	NC_031972.1	+	7917473	7921856	1011	annot_exons
novel_circ_003051	26.5396	63.0249	2	4	GeneID_100700705	NC_031972.1	+	8034300	8036063	273	annot_exons
novel_circ_003052	79.6189	0	6	0	GeneID_100700705	NC_031972.1	+	8034300	8041115	547	annot_exons
novel_circ_003053	0	31.5124	0	2	GeneID_100692593	NC_031972.1	-	8343361	8377561	1359	annot_exons
novel_circ_003054	26.5396	31.5124	2	2	GeneID_100692593	NC_031972.1	-	8351725	8377561	1122	annot_exons
novel_circ_003055	238.857	157.562	18	10	GeneID_100692593	NC_031972.1	-	8370693	8377561	747	annot_exons
novel_circ_003056	690.03	661.761	52	42	GeneID_100711708	NC_031972.1	+	8619056	8622838	233	annot_exons
novel_circ_003058	13.2698	126.05	1	8	GeneID_100711708	NC_031972.1	+	8619056	8645983	495	annot_exons
novel_circ_003059	26.5396	0	2	0	GeneID_100711708	NC_031972.1	+	8662885	8710439	420	annot_exons
novel_circ_003060	92.8887	94.5373	7	6	GeneID_100692051	NC_031972.1	-	8756994	8760020	833	annot_exons
novel_circ_003062	172.508	157.562	13	10	GeneID_100697660	NC_031972.1	-	8932344	8941591	2339	annot_exons
novel_circ_003063	53.0793	47.2687	4	3	GeneID_100696591	NC_031972.1	-	9123036	9126706	1105	annot_exons
novel_circ_003064	0	31.5124	0	2	GeneID_100696591	NC_031972.1	-	9126582	9144123	978	annot_exons
novel_circ_003065	199.047	173.318	15	11	GeneID_100696591	NC_031972.1	-	9141755	9144123	853	annot_exons
novel_circ_003066	39.8094	0	3	0	GeneID_100695801	NC_031972.1	-	9276544	9277507	443	annot_exons
[truncated: 9,264 more rows]
