# Supplementary figures and images for: A comprehensive profile of the tilapia ( Oreochromis niloticus ) circular RNA and circRNA–miRNA network in the pathogenesis of meningoencephalitis of teleosts
Source: Royal Society of Chemistry journal article supplement (doi:10.1039/c9mo00025a), 2019-05-02

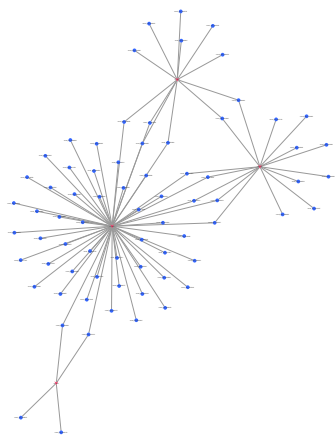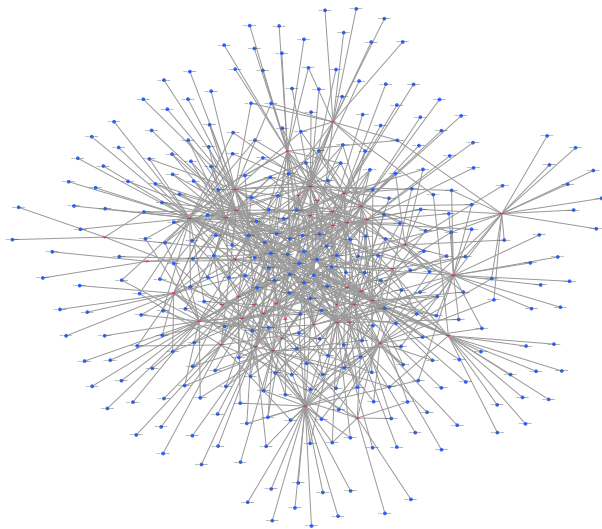

Supplement: c9mo00025a1.zip [file c9mo00025a1.zip]
